# Supplementary material for: Genome Features of Asaia sp. W12 Isolated from the Mosquito Anopheles stephensi Reveal Symbiotic Traits
Source: Preprints.org preprint supplement (doi:10.20944/preprints202101.0526.v1), 2021-01-26
Supplement: Supplementary file 1 [file supplementary]

## Sheet: Table S3 part1
Table S3 The putative prophages predicted in various Asaia
Strain Name	Region	Size	Status	CDs (Coding DNAs)	Putative Phage	G+C%	Position (bp)
Asaia astilbis JCM 15831	I	38.7Kb	intact	53	PHAGE_Acinet_LZ35_NC_031117, transposase	56.26%	137169-175964
	II	24.5Kb	questionable	22	PHAGE_Brucel_Tb_NC_019446, putative tail fiber protein	57.08%	470627-495198
	III	30.9Kb	intact	44	PHAGE_Pseudo_PPpW_3_NC_023006, hypothetical protein	56.04%	1054266-1085167
	IV	11.6Kb	questionable	20	PHAGE_Escher_D108_NC_013594, gp36+37 fusion long tail fiber distal subunit	60.77%	2570821-2582468
Asaia bogorensis NBRC 16594	I	33.5Kb	questionable	25	PHAGE_Burkho_phi1026b_NC_005284, integrase	60.80%	48333-81894
	II	48.7Kb	intact	20	PHAGE_Salmon_BP12C_NC_031228, integrase)	57.77%	1535418-1584181
	III	12.6Kb	incomplete	22	PHAGE_Mycoba_Shipwreck_NC_031261, gp10, site-specific recombinase, phage integrase family	57.97%	1693290-1705925
Asaia bogorensis W12	I	19.8Kb	incomplete	29	PHAGE_Aeromo_vB_AsaM_56_NC_019527, XRE family transcriptional regulator	60.43%	695590-715422
	II	13.1Kb	incomplete	11	PHAGE_Caulob_karma_NC_019410, exonuclease	61.34%	722791-735901
	III	19.7Kb	incomplete	8	PHAGE_Mannhe_vB_MhS_535AP2_NC_028853, plasmid maintenance system killer HigA	60.26%	1756200-1775995
	IV	30.6Kb	intact	45	PHAGE_Gordon_Ghobes_NC_031028, DNA transposition protein B	61.45%	1782874-1813524
	V	10.7Kb	incomplete	12	PHAGE_Caulob_karma_NC_019410, exonuclease	57.88%	2051277-2062038
	VI	23.4Kb	questionable	35	PHAGE_Mesorh_phagevB_MloP_Lo5R7ANS_NC_025431, ApaG protein [Gluconobacter oxydans H24]	59.04%	2439649-2463093
	VII	9Kb	incomplete	7	PHAGE_Cronob_vB_CsaP_GAP52_NC_019402, putative DNA injection protein	60.61%	2461031-2470098
Asaia platycodi JCM 25414	I	8.6Kb	incomplete	10	PHAGE_Xantho_phiL7_NC_012742, phage head maturation protease	63.63%	86594-95209
	II	12.3Kb	incomplete	15	PHAGE_Rhodof_P26218_NC_029061, pectin lyase-like protein	58.60%	1338747-1351106
	III	9.7Kb	incomplete	10	PHAGE_Sphing_PAU_NC_019521, glycosyltransferase	59.71%	1804183-1813963
Asaia platycodi SF2.1	I	16.6Kb	incomplete	18	PHAGE_Pseudo_MD8_NC_031091, DNA polymerase III subunit epsilon	59.60%	1616424-1633072
	II	14.3Kb	incomplete	16	PHAGE_Salmon_SEN34_NC_028699, putative portal protein	59.35%	1644629-1659008
Asaia prunellae JCM 25354	I	13.6Kb	incomplete	21	PHAGE_Pseudo_vB_PaeM_MAG1_NC_031073, putative endolysin/autolysin	55.19%	256301-269916
	II	20.7Kb	incomplete	12	PHAGE_Edward_GF_2_NC_026611, tail tape measure protein	54.80%	1602765-1623524

## Sheet: Table S3 part2
Asaia astilbis JCM 15831
Genome; Raw sequence .3147416, GC%: 58.03%, length = 3147416 bps
Total : 4 prophage regions have been identified, of which 2 regions are intact, 0 regions are incomplete, 2 regions are questionable.
REGION	REGION_LENGTH	COMPLETENESS	SCORE	#CDS	REGION_POSITION	POSSIBLE PHAGE	GC_PERCENTAGE	DETAIL
1	38.7Kb	intact	130	53	137169-175964	PHAGE_Acinet_LZ35_NC_031117, ......	56.26%	Detail
2	24.5Kb	questionable	70	22	470627-495198	PHAGE_Brucel_Tb_NC_019446, ......	57.08%	Detail
3	30.9Kb	intact	100	44	1054266-1085167	PHAGE_Pseudo_PPpW_3_NC_023006, ......	56.04%	Detail
4	11.6Kb	questionable	90	20	2570821-2582468	PHAGE_Escher_D108_NC_013594, ......	60.77%	Detail
Region 1, total : 53 CDS.
#	CDS_POSITION	BLAST_HIT	E-VALUE	SEQUENCE
1	complement(137169..137297)	PROPHAGE_Mesorh_MAFF303099: transposase; PP_00176; phage(gi13475316)	8e-10	VSYKQHQFPCELIAHAIWLYFHFPPNFRLVKEMLLERGIIVS
2	complement(137363..138001)	hypothetical protein Gdia_2310 [Gluconacetobacter diazotrophicus PA1 5]. gi|209544451|ref|YP_002276680.1|; PP_00178	6e-46	MPQSSSPASQTTPLTYMRSKMDEADTMFKEGLADISQPSDLTQLAGKLLDLCNDVSDHLAHICAVKPVACHNGCDICCKSLIQINPIFARLALEHARDIFTQERLEQLHQRLVEGTPFCPFLFDGSCSIYEKRPMVCRGYYSLDISMCQTGIFCEGETGYQGDDGHAAHQYRIFLFVLEKRIEEIERGFGIEPGPVFLHEAVRDLWSERVHG
3	138002..138211	hypothetical; PP_00177	0.0	VLFPNGCCNIDWDKPPDFGMNRRGSGPLALQGASVGCAEFQAPPTRGFIRGPRPNRRDITDLPRGYLYS
4	138545..138781	hypothetical; PP_00179	0.0	MQNKIDSLMEALTNTAIGFVVSFVTWGIVAPAFGIPMPLRENLEITAIFTAVSIARQYVLRRAFNGRSVWAAIKGARS
5	138778..139107	hypothetical; PP_00180	0.0	MIEGALRFNEGKLRFDLLPPDPVEELVAVLTMGAKKYSERNWEKGMSWMACQASLMRHLSAWMKGEDRDPESGRLHMAHVMWNAMAILTYQLRGIGTDDRPKIPTYVAT
6	139144..139416	PHAGE_Burkho_phiE202_NC_009234: gp6, pANL56; PP_00181; phage(gi134288760)	4e-21	MEIEFDPKKRDATLKERGLDFRDADKVFSGRTATLADTRVNYGEDRFITAGFLNERLVVVVWTERGAYRRIISMRYAHAKEITHWESHMG
7	complement(139625..139777)	PHAGE_Salmon_MA12_NC_031021: hypothetical protein; PP_00182; phage(gi100045)	3e-15	MIVEQHRTLAAKDAYASRGGWLSGRSACAITYHRKLGEVERLTISPDAVS
8	complement(139978..140739)	PHAGE_Escher_ECBP5_NC_027330: putative oxidoreductase; PP_00183; phage(gi849119787)	6e-61	MIPDSVIHDAIKETGSHTKAAAKLGVNRRTIDKRVQTWRKRGFSPEHDLTHSVPDGFRLKGASTLYDENGIKRLQWVKSQIDPERMEQITRAALEEMARKLPREKPRAAPAVALDDLATCYVLTDFHLGMLSWHEETGADWDIGIASDLMTRWFASAISKSPASGVGILAQIGDLLHWDGLEAVTPASKHVLDADTRFQKVVRVAISSLRRIIAAMLEKHGTVYVLNAEGNHDLRHPSGFGRCWQSSTKMSLA
9	complement(140800..142128)	type III restriction protein res subunit [Rhodomicrobium vannielii ATCC 17100]. gi|312114232|ref|YP_004011828.1|; PP_00184	9e-63	LRPYQERVSHEVGAILREGVRRVLVQMSTGAGKTVLASHFIERAQATGRRIFFLCHRIELVAGTSGTLERYGISHGVIAAGYAANPEALIQVCSIDTLKTRLGDVPTPWAIIVDETHHCRAAGWEQAISHFVDAGSILIGLTATPKRLDGRGLGAFFDSIVLGPQTADLITSGHLSGFRHFMPDAPDRFLVGDPVAHWQRRAVGLRSVGFAKDTAHSRRIVEQFNAAGVPAAHLDANTPKEERRNTIRAFADGHILVLINVDLFGEGFDLAAVAGRPVTVDCVMFYRRTKSLSLYLQWAGRALRPAPNKTAIVLDHAGNWYLHGDIDAVREWSLGDDTGKIAKPAERAPITCLNASARRVSRTLKRVKLFTRTANAADTPSRSKSGKSSRKLRKASCAK…
10	142271..143098	PHAGE_Entero_Tyrion_NC_031077: hypothetical protein; PP_00185; phage(gi100036)	9e-53	LNDSAFYKDGLPNAAYHAHEAISKSQLDHIARSPALLEWSKNAPRDEDAVKAFDFGTALHALILEPEVFGETYVREPEFNRRTNAGKAEAAAFAEEHTGKNILSDADYAALMLTRESALAHPIVRKIIEAEGVAERSYFWTDAETGVKCRCRPDRELTKMRWFVDLKSTDKLAQFHYSTVDYRYYVQDAYYSQGYAAVTGEDLEAFLFVAVGKTRSAGRYPVEVYTLPTEVKEEGAREVRRCLRLYADCLDKGVFPGVQTLEMPPSFMSRIAAKV
11	143100..144044	PHAGE_Entero_Arya_NC_031048: hypothetical protein; PP_00186; phage(gi100040)	3e-68	MANILNIRQAKRKGARLIIALAGTSGSGKTRTAIEFGYGLAGYQPSKLGFVDTENRRGSLYADVLHRHATHPTDEPFLIGDLDAPFTPQRYAQAVKEFQAAGVEVLVIDSYSHLWEGDGGCLELAKRGRGVGAWKEPKEHHKEFVNSMLAAGMHVILCVRAREKIDTSDSKNPRSLGILPICEKNLMFEMSASMLMDGMGKFQDVMKCPEELAPHLGRGKGYITSADGFAVRQWVDGAEAEDKATEAAYHALRHIVREGVAAYRNAWMKTPERERKLLEADGRHTKLKAEAEAFDKRRETQASDAKTLNDAAIQ
12	144151..144609	PHAGE_Entero_Arya_NC_031048: hypothetical protein; PP_00187; phage(gi100035)	2e-38	MAHSVNKVILVGNLGKDPESRRTQSGSLIVNLTVATTEKWKDKQSGEPKERAEWHRVVIFNEHLAKIADQFLKKGSKVFLEGQLQTRKWTDQSGVDRYTTEVVMTAYKGDIVMLSSTGESGGQSSTSSRNTGSNNTGGWDAPGGDLDDEIPF
13	144625..144801	hypothetical; PP_00188	0.0	MNTFDIGQRVVAATMRGEKKFEGEILKIEDTLRGAWYHVKRDLDGLIIKVRAAKMRLV
14	complement(144998..145294)	hypothetical; PP_00189	0.0	VVFPTLDLNSFIYLNIFMLIKERHGVLKGTNDALVIFFLVVKMSLTHPSFDEDIDSVNTLIIVIRLHADDLFGIDYLIFVRVPPNQVPILWHFTYGPP
15	complement(145336..146451)	PHAGE_Entero_Arya_NC_031048: hypothetical protein; PP_00190; phage(gi100026)	4e-63	MGLKPRFRITANDTSITDDLVTRFVSLRLNDETGFMSDDLEIVLADHDPAARIARPVTGALLRLALGYDNQLTDKGAFVVSGASRGAEKGGVRTLTVRAHAAPYDNTPGGITDFQTQLTRSWSDGITIGAMVKTIAAAHQMQAVVSPFLASVQLPHMDQVEESDISFLVRLGRLYDAIAKPAGGKLLFLARGLSQTASGAALPVINLTESDVSRWNWDEDRREAPGTVVTKYHIPKSAKTHAVSVGSGNPVRLLKRRFRTQAEAKAAAMAEMSRRARGAIRLEIEMPGNAEITAEATLNLDSTFGPDVSGVWLVNNVVHEQGKDGYKTHARAERPNSDPSVSAYLNGTVNDTILVPPVNTNPGAHRVTDGY
16	complement(146442..146627)	hypothetical; PP_00191	0.0	VLDGIIYQVFGYCNDDALAQVYALNQNLANSGPIFPVGVTIILPASIQATAPNTGVISLWD
17	complement(146644..147021)	PHAGE_Entero_Arya_NC_031048: XRE family transcriptional regulator; PP_00192; phage(gi100024)	1e-20	MLMLGNFKFSLNTAPFSEMTRTTAASWGTIPRFGQYDAMQFTGPGPDTVELPGVIYSEKFGFPASIDQLRSMMMAGQPERLILGDGSIVGAWVIIGIRESKTNFNSTGSARRIEFTVSLTKYADV
18	complement(147147..149558)	PHAGE_Ralsto_RSA1_NC_009382: bacteriophage tail protein gpT; PP_00193; phage(gi145708104)	2e-94	MAEKRLKASIIIGGLMDGSLRSAMSGTQSGFRRIGDAISGARKHASRLNEEIKALDSSGGSVEKLKLKYDTLAKAISRAEDAQKRLRSSEARSARIGEIGSGLRSRAVGVGATGALFSPMTISGVREAQKMEQQTAQIGALGVGEDVTRSAVGFARTVKQYGTSQVAAVEMMRDALSVFGSLTEAKIALPILERVRFANSSIYGHEKGEEATKNFVDMTRVIDNRGGGNDSASFKRQADFIQQVYSVSGGRIVPKEWLDLSTHASIAGKSMSDAAFYYQNMPLINDMGSGAKVGTGLRNIYSHVVQGSNTVREVRAMERYHLIGDVSKVQHDKVGQVSHINPGALIGSQLLGYGKNSVFDPYQWMKKYLLPTLAKQGITGRSEVLAAIGSILGGGTGGG…
19	complement(149689..149994)	PHAGE_Entero_Arya_NC_031048: hypothetical protein; PP_00194; phage(gi100022)	5e-08	LPTEREIPEYLTLSEDGTSITVKLSRPVELDGVKRDTVVLREPTAGEQKRYLPNSQTAKAIGDAEARLIAYLSDGLTPTNLDALPARDYTRLLEAFSFFTD
20	complement(150052..150561)	PHAGE_Entero_Arya_NC_031048: hypothetical protein; PP_00195; phage(gi100021)	2e-35	MAGPRLVLKNQNLFFSGKSYAGSVTEWNPPKIAANTEEFRAGGLDVPIKLTMGMNTLDTDFTVISFDPVLLGSVYAREGQDASFIIRQAYEDWDGTITAREIIMRGKVTEKDEGTHKAGQQSNLKITMNLLYYSDTFGGSLVDEIDVINMIWNKGGIDGLADIRAAIGM
21	complement(150561..152033)	hypothetical; PP_00196	0.0	MASGFLHGAEVINVTSANQSATTIDTSVIGIVGTAPYADPARWPLNTPVLVMGDDTSLIAALAVDAPANQGDVGTLVPAFSDILDECSPVVVAIRVEAVASNGGEAALSYDPATIPNVVGGLSSEGKYTGVHCLLSAESSVGKRPRLLCAPGWTHQASSNGIISIAVSNGGSGYTAGTYPLTITDAKGAGATATVTVNSAGVVASVAVTANGSGYTGTTFSMPSSAGAGTGASFTATIVTTQNAVVAELKGIAETLGAVIYADGPDTNAVDAITAAEEGGARVMLIDPWIIKENASGVNDSFPPSAKFAAKQAYVDSTVGFWTSVSNKALNGVIGLTRPVDFVLGSQSCQANVLNAANVATIVRTSKGYTTWGNRALDGSFLCVTRTVDVINASLMSAI…
22	complement(152185..152439)	hypothetical protein [Frateuria aurantia DSM 6220]. gi|383316770|ref|YP_005377612.1|; PP_00197	6e-11	VSNGGYGSLIDLSTVTEDSNYIPAPTLAKQASDELSSARGYVYNNYGILNEPTPDAWVSYLKALMAIANGTDKTSTTLPPEPVV
23	complement(153244..153822)	PHAGE_Xantho_OP2_NC_007710: hypothetical protein; PP_00198; phage(gi84662682)	3e-31	MDISETILSQYQNANGWKTIIYSFAEAVDPDVFFDAWYEKIWNPRTAVGIGLDIWGRIVGVGRVLQVASDGFIGFEEAEEGGTSTVIRGFNRGVFYSGQPTTSNVALTDEAYRSLIFAKAAANITDCSITSINSILMSLFGYAGRCYVIDTGKMTMTYKFEFVPTPVELSIIYRSGVLPQPTGVAVSYAFNE
24	complement(153888..154946)	PHAGE_Edward_GF_2_NC_026611: hypothetical protein; PP_00199; phage(gi764162276)	3e-53	MGGSANPALETPQGQLATSETAAIANCYDALLYVANSVDPAVASGRMQDAIGNIYFMERNPAIATTVVATVTGASEQDIPAGTVLATDGTYQYEVVSDATLPAVSGGLSTGPVTVQNTQAGAFPCAVGALSLYQYVAGVSTVTNLVDGIVGAAEEGRIAFEERRSNTVAGNSNSQAASVLGRVLQVQGVTDAYAYDNGTSSAVTYNGVSVPANSLYVSVAGGAAADIGLAIIQKKAPGCNTAGGSSVTVNDPASVYNGNGPSYTVQYDIAVAAPIYVSVSLKSGVDVPSTALDQIQQAIISQFASGGTSGARPTIASTIYASQFSCPVMALVLGFVLSRSISAHLHRHHPHS
25	complement(155050..155403)	PHAGE_Acinet_LZ35_NC_031117: hypothetical protein; PP_00200; phage(gi100026)	1e-13	MKSLLLDRTTWDLVVDRKGNLAICTEPYSVLQDVSCAIRVFLGECYYDTAKGIPYKTQVLGIQQSAAIFQRLAEAVAKTVPLVKDASCIVSNVGADRRLSGVMQVVLTTGEILDVQF
26	complement(155488..156126)	PHAGE_Acinet_LZ35_NC_031117: siderophore-interacting protein; PP_00201; phage(gi100025)	6e-26	MTEQVTLQDIFSRQTDAGAVHSLVKSAISELGTSVLVQVQAVHGNGATITGKVDVQPMVHQQDGQGKPLPHGVIYGVPYLRVQGGASALIIDPIVGDIGYIVIAGRDMQNVVQTRQPASPASFRMHSMSDCVYVGGFLNDAPTQYVMMNGDGMRIVSPNPVTINAKSVQVNCDVAVQGKITASGDVVAGSISLQNHTHSGVQTGSGSTGKPQ
27	complement(156129..156419)	PHAGE_Xantho_OP2_NC_007710: hypothetical protein; PP_00202; phage(gi84662686)	1e-07	VSSATGMIGYPTYNNSGVSITTLFDPRLNFMSPFAIDSQFLPAAWVNNQAGQIAPMPVNGTWRANMVTHSLDSEIPNGQWFTRVDAIRNDFAGSLR
28	complement(156434..157171)	PHAGE_Acinet_LZ35_NC_031117: XRE family transcriptional regulator; PP_00203; phage(gi100024)	1e-08	VVSRLLGGIMSETTTATASRLPSSFTAKKIEITFTTLTKGGNPTILDQETLKGFRCQVDVTNAGLAVGSSANARIYGLSLPMMNRMSLMPSPVAAIMSPQERTNLNHIQISAGDDERGMTTIYNGTIFSAFADFSSVPEPAFNITSHTVIVPSTSPIAPHSFPAGTDIATMASQIASDAGYSFANFGVNGKLLARHMSMGLSAIRSSSSVARIGSFMTSRTRVRRPQRPRLNTSRSGRTISVISP
29	complement(157144..157437)	PHAGE_Burkho_Bcep43_NC_005342: gp49; PP_00204; phage(gi41057702)	2e-13	MAGVVPLVATKNQSLTVYLGGQSVRIEVQQRRTGVYLNIYLNDVQKVAGALALTNTYIVRADYLGLPGDFAFIDLQGSDDPNYTGFGSRWFLVYSGA
30	complement(157437..158192)	PHAGE_Acinet_LZ35_NC_031117: hypothetical protein; PP_00205; phage(gi100022)	4e-15	MAFPTVPLPDVWDLPVVSGVPAVLGQSVGNAVSAAASDLLGQAVANIQISAAFKHWGIFDGADPVLTAGRVVELGHGAQYQVPTGPAEKGNFVSYNKVKAPGLTTVVMICDGSESGLALLEGFSGGITSGFQKVLGSITGAGPLQVRKSFFTTLEQVAGDTKLYDVHMPEYTYTNVNIVGYQFRRSEVDGLTMPVVEVQLQEIRNSATLSYRDTASKSPGASPVVESGQVQIQQLPNGAPDLAGIMDGITG
31	complement(158192..160243)	PHAGE_Aeromo_vB_AsaM_56_NC_019527: putative tail-fiber/lysozyme protein; PP_00206; phage(gi422937553)	5e-23	MSLIDSLVIQLKLDAKGFSPEANKTVQQLKDVEKQANSTGNGIEKSGGKGAAALSSVRREALAMFAVFTAGKGLKQFVGDTTKANAQLDYMSKRLNMDPATLTRMETAAKAAGGSFGEMSQAFSNLQQRMTNPEEAAKIALTFSRLQVPDFTDEAGNIKSDIVERLNKSIHDNKIDPRIATSWLKDLGFGDGAINEALMDPKKFADLQKQIKGMAAPTKEMTEAARHLNQEWVIFSEQSQQLASMFTSKLDPALDGFLQKLIGLEKEYPNTTGALAVVAGGVEELTKSFGGLIGVLGSLSALRIVKRMFGGGGTAKAGGLLGRTAEGLAGLGEKGALTGALALGGEATASLAGFSALPAAAGAFAAYRGYQENKASQDEIDRSRSEASNHADERRKYLY…
32	complement(160347..160460)	hypothetical; PP_00207	0.0	MSETEEEKELLARMKLLLHWSKKRAKVHALRKRSALA
33	complement(160457..161281)	PHAGE_Salmon_118970_sal3_NC_031940: major capsid protein; PP_00208; phage(gi100126)	3e-20	MSAAKKLNTTNASSLTILATAIRQDAEGRYCLNDCHKASGGMKKDGPSYWLATDQATAIAAKLTDTENPVSPVSSIKGGANQGTYVAKELVYAYAMWISADFSLTVIRAFDAMVQGVLREDRKIKRPRKPAFDTTYTRLLKIARTLPGFDENQQCLHAARGTFNMTGVNPLEIMGVTALAAPDNDSYLTATEIGQQIGLSAVAVNKLLISEGYQVKVEAASSGSDYQATEKGAPFGRMFDAARKGGKGSQAQLKWCNRIVKHLRPFSRPKEKAS
34	161763..162392	hypothetical; PP_00209	0.0	LGRYRFILYLLVVIGAYQCAIRKDRSETAWGIVVAIFPAAFLLIALLPKSRGSYSTSDDSPRLITCPACGKPTSSHAKSCPSCGNPISKSGFLPRLRETLGWVSFVILAAAFGYQSTQFSSQSGGTDFPRCDSDAAKREVIAAIANAPLGKVAGINIIGWDDIRTLKDDYDQRICHAMVSLNTGSKTGASYKFTVHNGEVFVEFEIEDK
35	162393..163361	hypothetical; PP_00210	0.0	MSFSIPAEKNMTAYRSIARRPHAAKHLMVIGLFALSSCAFSDPNDPSSLFAGGYSLHPELQPWQDAHIPYSDIAKWQGMGFTADDAVIAYKEGLTGPDEVAPWYHLYSPTGSTAGSLPGLLITYAAGSRNAFTPQDVSVVLGNTGASFLNYEEVSALARLVHNGTPGSDLTAARASMKREAIRNNEAAQKRQRDAEAAEKAREKQALVDRYGADNLSACNGKVVTVNMVVTNENPYSTNGICIEAAVRSVMGGIQWLNEHTVLITDGMQLSGQSPASIVIDPDGPLKLNSIALLKGVRPTTYTSVMGAQTVAPTFMVLKYLN
36	complement(163358..163495)	hypothetical protein APA12_05320 [Acetobacter pasteurianus IFO 3283-12]. gi|384041550|ref|YP_005480294.1|; PP_00211	8e-05	VNVSRPIAYVIGSGLATLHELKTVYDTEDLLDLIEIARVRDYNGG
37	complement(163492..163989)	PHAGE_Edward_GF_2_NC_026611: hypothetical protein; PP_00212; phage(gi764162263)	5e-06	VGAGLSRSDLMSEKEVTLVLNDGGVDKTFLIKRMDAFSADKWARHLIKALTRAGMALPEDAVQLGMTGLSAGSAQSLFGQLDDDAADQAIASLRGTIKRVLDPSNPLLTRAMNATDIEDPATLSKLDVEAFRVHVGFFKAAAFFLFPLLEMLTPQAAQSESPSPA
38	complement(163959..164354)	PHAGE_Aeromo_vB_AsaM_56_NC_019527: hypothetical protein; PP_00213; phage(gi422937550)	1e-17	MTIETIAPVPFQLENWSVDGAWEGESLEQVITRMSMDGKLNAGFVWRAPTTTLTFQPGSASIPVFQSLQLGQSSGTTVYRLGGTLFLPGVQKRFTFEQGVMTTASFMPNGGETLAEQAFTFQWERVYPVAI
39	complement(164393..165547)	PHAGE_Burkho_Bcep43_NC_005342: gp04; PP_00214; phage(gi41057654)	2e-47	VATGTPISLVVSVVPGVIPANGTLNFLNGLVLTSNVTAVPEGTIKAFSTLSDVGLAFGVASNEYKIAAPYFVGYDNAFQTPSTLYFAGYTEGTDVPATFMDKMAEASLQWTGFTTAFEPALTEKQAFATWTGAQNARYWYVPWDTDATAITQDATGSFGAWLKTQDPTGTSVFYIDPAASGMALGWMAALNFSQVNGRQNLTFVSNGQVTPVAYTASQANALISNGYNWYGAFSSPAGDLNWVYNGTVSGPFLWADSYINQIWINAILQFADATTLSSFGNIPFNTQGDAIIAAGRQSVISQAVSYGAIQTGVAISDSQKLQINRFFGVTGAADAIMNQGYYDQPGASTASSANRAARTIPASKFAYADGQSVQMINLLSREVI
40	complement(165554..166060)	PHAGE_Burkho_Bcep43_NC_005342: gp05; PP_00215; phage(gi41057655)	2e-12	VEINTSLRSWLLTVVPDGYRVIQGQQNGTAAPSGPFIIFTPLFRRRIATNASSYTSTTRDVVEPMELTFQISAFGDTSGEAVQRISALWRDMYAADWLSNYTSGVISPLTASEPRQTGFINSDKQYENNWTIDLRLQVNFTVSAPQQFAQSITVDLQEVDASFPDNKE
41	complement(166078..166461)	PHAGE_Aeromo_vB_AsaM_56_NC_019527: hypothetical protein; PP_00216; phage(gi422937547)	2e-10	VFGMASGVVGIVNPATIITVVCFDSDYDNPDGSTSKQSFTLEVSADIQAVSSGDLEHVANLTQQSEMRAVYVQGGLKGLSRPLRVGGDILRFYGSDWRITQPVEEWGYGEWSKVIVTRQKQGGRSPT
42	complement(166463..166990)	PHAGE_Acinet_LZ35_NC_031117: RecT family recombinase; PP_00217; phage(gi100012)	3e-12	MAKTAFKGGDKLQKALNDLARKVNRGGSVEVGIFEDATYPDGTSVAQVAQWNEFGTKSTPPRPFMRQTINDKQGSWGNALGKALHATDYDAGKALGIVGEYIAGQIRETIANGSFAPNSDLTNLLKDRYPTGDYGSSEFLKAVSDLKSGERGPDGKPLVWSGQLLNSIRSEVSDD
43	complement(167464..167850)	PHAGE_Aeromo_vB_AsaM_56_NC_019527: hypothetical protein; PP_00218; phage(gi422937543)	8e-10	MADTVTVLCRLPHGLELRIAPEGDVERRAQLSAAGKPDRSPVGYIKSVTVNGANRAPDYHPKDNVLLGRVGRTQVEKGFWDLWLAQHKDSDLVKNHCVFAEVTERAAEAKAREFATEKMGSRASILKT
44	complement(167853..168896)	PHAGE_Burkho_BcepNY3_NC_009604: major capsid protein; PP_00219; phage(gi149882911)	4e-55	MASFRAEAPRLAMDWGINLRGVTHYTDEKAGAFDAAPVFGAVTAPNSGIPAILNTTVDPQLIRQLITPTKSEEIYGSEKKGDRTNKTVMFPVIESSGYAVAYGDYEQGGDSSANANWVSRQSFHFQTWAKYGDLESEMMGTASIPWVAEQRTAGVSVLAKQQNLVNLFGVSGLETYGALNDPALPAAITASVKSGTATSWLSTSDPNAVFPDFVTLYAALNKALMGNLDNQARIKTVAPSELSPVMAYTNSFGITLEDMLKKAFPNMEIVFLPEAGVTMSGGYTSANVMQMFAPEIDGVETVSTAFTEKLTMHRIEQYSTNARQKMSRGGWGTIWKRPMAVAQMVGI
45	complement(168896..169408)	PHAGE_Acinet_LZ35_NC_031117: kilA anti-repressor protein; PP_00220; phage(gi100007)	4e-18	MGFPNKINYNWSVGFPGGIASANPRRSAIPGPLGYRAGSSGVTVGAFGWVQADGVTVLNKPVGSEAPTGFVLRDQQGLITGYLAESTMLLPSGFNVQLMSGGDYFAVASTAATAGQAVYASTTDGSLQTGAAGTAPSGTVATGFVVTQGGAAGATIIISGAVAPISGSNE
46	complement(169421..170587)	PHAGE_Acinet_LZ35_NC_031117: XRE family transcriptional regulator; PP_00221; phage(gi100006)	3e-41	MTETMLALDASVRRVDDDGHLHIERCILSAAVVSPYYGAEIKDAERLGLKPDQVYQVYRDADALRDAAASMNGKPIIEIHQPVSADDHPREITVGAVSNVSFDAPDLVGELAIWDGDAIARIQDGTKRSVSAGYAYDIVPESGSIDGRAYTLKMVNIRFNHLALVEKPRVDTAIIGDSAPPKLERKSMAVNKPKSPAARLAAALNSGRVAMDASEEEIKKCMDEDDDEIVEDDDGDEDDKKAADADKDNDKAEDEDDEKKAEDEEEDDRKAADAAPRMIPLAEARRMAQDEARRAVAQQERKSAALRVALDAVRGRVGEVHGLDSAASVYRYALAQEGVAFDGVSDAKSLAAIWNAATQRRSAPQPMAADSAVASDSPLAGKSARIRA
47	170622..170786	hypothetical; PP_00222	0.0	MDPAKINREEQISGWDNNYKYYGNDVIPSMKDPNIKPASPFSKCRSFLYPITQK
48	complement(170867..171511)	hypothetical protein DT104_18631 [Salmonella enterica subsp. enterica serovar Typhimurium str. DT104]. gi|550901248|ref|YP_008670340.1|; PP_00223	1e-48	VAQDASPASVLQGIMNKLTARWRTRFNEVADELARRFVKQAQGHADRQLNFDLQRNGFAIKFRPTAGMRQAAALSAAENVTLIKSIPEQYLSQVEGAVMRSALRGGDLGSLTEELKDRYGVTHRRAAFIARSQNAAVGGAMSRARAVELGGSKGTWIHSGGGKEPRESHVKAGKERLVFDLVKGAYIDGEWIWPGSRPNCRCTFRLIIPGLNDD
49	complement(171675..173927)	PHAGE_Aeromo_vB_AsaM_56_NC_019527: putative portal protein; PP_00224; phage(gi422937534)	9e-49	MMQRAEFRKPVDVIAKECTREWIRFRSKKQTGGNGDDKDAARRISEIETAFKAFNVRDIIGEQIRHGLGYGIGHVWADVGGLGFEATSQATPLRANENGMKKGSLARFKNIEPIWTTPADYNSDTPLRENYYEPSVWWVQGSRVHASRMKQMVPFPVSQMLMPAFNFGGLSLTQQLKTYVHNFLRLRNSVSSIAANFSKLVLLTKMAGRMQGSQSGAFGSIDADEVTGRAAFLQSVSDGQGTIVADKESEDAKILATPLGGLNELLAQAMEAMASIPGIPLVKLFGIQPTGLNACLVGDTLVETNRGAVPIKEVTVKDLVLTRNGFAPLTFAGATKYAVELYEISTAEKSIKCTGNHPIWMPELEKFVPAENVQVGQRLLLIGENPDAPKMHRPSHGGG…
50	complement(173924..174247)	hypothetical; PP_00225	0.0	MKSWFSRKPAEPAARVEPRPAEKKEPRVSFAGFAADEQNAHFQRAEEAARAFQPYAAPAGVRGEVIATDSAMSLPAGFGAWAGENIGILEGYIADGLSFQATRISLR
51	complement(174252..174416)	phage terminase, large subunit [Nitratiruptor sp. SB155-2]. gi|152990214|ref|YP_001355936.1|; PP_00226	6e-05	MYSYKVDPRDARLILPKLEDKWNHGIDALRYALSPLIQNRRTMPSFASFSPNRR
52	complement(174485..175468)	PHAGE_Bdello_phi1422_NC_019525: putative TerL large-subunit terminase; PP_00227; phage(gi422936857)	2e-75	MSQTRIEIPPAFGDFGRGYRYRVWYGGRGSSKSWTVARVLVALAATRPIRVLCVREFQNSINDSVKRLLADQIEALGLTPWFKVQETSISSKAGAEFLFKGLARNIQGIKSTEGVDICWVEEGQTVSQSSLDILIPTIRKAGSELWFTYNPEHDDDPMHRLMLMLQEEDGALVRKVGWQDNPWFPPELNAERQLLLRHDPEAYEHVWEGECRTISEAVVFRHRVSFEEFETPDNARFYFGADWGFSQDPTALIRAFIDDDVLYIDQEAFGLGVEMDELPASLIACQARVIGRSSQTVRGPRRLATWQTGIASASCQPTSGKAVSKTE
53	complement(175449..175964)	PHAGE_Entero_Sf101_NC_027398: terminase small subunit; PP_00228; phage(gi849122263)	2e-23	MAKRAGKVAEAEAEAPVPRGRPSGYCAELARDICLLLAEGQSLRRICAEERFPAESTVRGWVVDDREGFSAQYARAKEMGLHSMAEETIEIADDGTNDTYKKEDGSEAVNSDVVQRSRLRVDARKWFLSKMMPKVYGDKVTQEMTGVDGAPLQMPTLVIAPFQAKDEPDEN
Region 2, total : 22 CDS.
#	CDS_POSITION	BLAST_HIT	E-VALUE	SEQUENCE
1	470627..470694	attL GCCTTCACACGGCAGGGGTCACAGGTTCAATCCCTGTCGCACCCACCATCCTCACCCCCAGAATTCAG	0.0	GCCTTCACACGGCAGGGGTCACAGGTTCAATCCCTGTCGCACCCACCATCCTCACCCCCAGAATTCAG
2	complement(478046..479593)	PHAGE_Cronob_CR5_NC_021531: putative tail fiber protein; PP_00581; phage(gi514051519)	1e-10	MASWLWTTDGEKVTPGQLAQRRQIAQSLLQQGQQTPAYNWAQGAANAMNSFLGGFMQGRANKAEEAIDADSDKFVQSLISGGSQQQGGSQDDHLLSAVRAPQSPQVAEATQNAASDIIADRYYDRLKQVESGNNLTAKALTSSATGPYQFTDGTWRGVMKQHPDLGLTLDGRTDPTQADAAVRALSSDNIAYMMQHGIQNPDAGQRYLAHFAGAPTASRLINADPATPVSAVMSPGQINANPFLRGKTAGDVLGWATNKMGGVDAAQMPAPQTAPSTQQQSAPMVAPLPAQTGPSQAELLQALANPHLNQQAHTIAATLLQNQMQQQQADRASQQEQQTWLARQNYQQQQQANDPLRQAQIAEYGARADALRQKTNAPAGPGYSMLSPQQAQSMGLDPR…
3	complement(479593..479901)	hypothetical; PP_00582	0.0	MIWGSDGQLVSSDQHRMAIAQALLQQGQQPANNIAQGAANAISSFAGGYMAQQARNPADPFSGSGVDAFSSQAGPSQPESALLPNAGQAENPYLQKIFGGGF
4	complement(479903..481507)	PHAGE_Brucel_Pr_NC_019447: structural protein; PP_00583; phage(gi418487858)	2e-25	MNTGTQPMVSSPKAPDPYETANAQSQYNMMTAQTQQLMNMTDQYTPYGDVKYDQVGSTQITGPDGKTYQVPRFSQTTTLNNQQQQTLGQQQQAATNIASTANSLSNTGLSNLSQAVDTSGAPALQSNLGSGFSQSPGANYSSSVGGGYSSGLGSGYTSNLGSGYQNSLGNGYSSSLGNNYSTALGNGYQTSFGGDVSKAYSDAKNAVMDQYTPTLDRNSEASRAQMIASGIRPGSAAYTANEQTIGDNYTRAADQATQTAQSVQNQLFNQQQAQASFSNNALTNQMNTQNAAALQGQGFTNSAALNSANFGNSSLLNQAQFGNQAALQGQGFTNSALLGQMQAQNSAALGAQGFTNSAALQQAQFGNDARNQYLSQYYQQRDQPLNELSALLSQSQVNN…
5	complement(481461..481886)	hypothetical protein [Rhodopseudomonas palustris DX-1]. gi|316933871|ref|YP_004108853.1|; PP_00584	2e-30	MLRIISSAENDARIPRFLGERLGVAFYPPFTTMGLERNGEIIAAFLFNIYTGPDIHVTIAGSGWTRRFLREMGQYLFEQLKVERFTAITENQSVVDIVKRVGGRKEGLLRNHFGPDRDGILLGVLKNEYRYATHGKLTQS
6	482384..482503	hypothetical; PP_00585	0.0	LERATASFPAAARSSAGVAHPANKSKADVAMSFFTELLT
7	complement(482520..484295)	PHAGE_Brucel_Pr_NC_019447: structural protein; PP_00586; phage(gi418487856)	5e-120	VSFPPPTAGWISNQNLVLNTSDKPGAVVLDNFWPTPQTVRMRRGCALYSQPDQSQVCDTLMSYDNGSIQRLFACIGSKIWDVTSASEPEVVQSGLTGGEWSYVQFATTGGIWLIAVNGVDPMQLFDGSRWWPITGADILRIPLGTSSKVFSAGETVTGGTSGATGTILYANSSEIYLTSTNAKAFSSGETLTGSNGGNATASAASETWFPGIKAASSSSIADIETSDFSFVWAYMGRLWFVQSGTMNAWYLAADAFSGNATPFPMGGIFSDGGELMFGSSWSLDNSSSGGLSEQCVMCSENGEVAVYQGVDPNLASSWSKVGLYRIDKPRGKRAFIRNGGDLLIATDAGLIPLTQAVQRNPSDLALAAVSYPIQDAWSQYVAERPTRNWQVMVWPEMQM…
8	complement(484340..484795)	PHAGE_Brucel_Pr_NC_019447: structural protein; PP_00587; phage(gi418487855)	7e-18	MLVKADVHSSIWSVNYEPAKDKDEWIQLQRFMPSTIPGYWIIYGGQMHLLPTPRANENPTFWYISAKLVRGADGTMKADFDSDDDSFVLDEQLLLLSTIWRWKQAEGLDYQEDMQNYEVRLSQLAAKDQGSRPIRANRSGLNRLGIWAMAR
9	complement(485025..485744)	hypothetical protein [Rhodopseudomonas palustris DX-1]. gi|316933868|ref|YP_004108850.1|; PP_00588	4e-23	MDLAFSRVDAALTDFAVTPFFRHETVEDVMASQREKRAVMRTIEVCELRIAGEKNYVPVVPADSIWQIQNGQAVTYAERFSEQYRQFKTGGAQEASGTPLQELSPYGITPAQISLCRAMKIHSIEAVHSLEGHALKALGVQGNDLKRMTSAYMANLTRGGQVESELEQLRRQVAELTAALRAPSPVGVPSEGEHDDGVDEASFSSMSDDQIKAYIRERSGSTPRGNPSRDTLVRMAMEA
10	complement(485786..486079)	PHAGE_Brucel_Pr_NC_019447: structural protein; PP_00589; phage(gi418487853)	2e-06	MATLRTNPSLGPGLDTVLAPGDAWFDVAANVSPLYGDVAFDGSGHKRIWVTTASALTAGAAIAIDNSGNATANASGTYAAPVAVPAGGSFWAQSTAN
11	complement(486092..487096)	PHAGE_Brucel_Pr_NC_019447: major head protein; PP_00590; phage(gi418487852)	7e-96	MAVTSNRWLRQVLTTSLEDRSKDIQDLVFSSNPVLAILRENDRFKEYSGPDIRVPLTIDKLDGQWFTGYDKLNNQPKELINSAVWTPKNVAVGFSLTGTEILANEGRAKIIDLVDTYMENAEDSMKNVMEEAIHGDGTGSGGREMIGFGGAIPIVANTGVYGGIDRAQVPMWRTSSFNATTDFPDIGTAFDVTTAMRILRRIIAQRSKGTRKADLIICDIKSYDVIQSALTSIQRITSANVGKLGFDALELSTPAGPVAILCANGVGTVMPDNTIYGIDSQALEMRYHPSRNMVPLFDGDGARPINQDAIVQYLVWNGEMVLKNPRYTWRLVTA
12	complement(487112..488239)	PHAGE_Brucel_Pr_NC_019447: structural protein; PP_00591; phage(gi418487851)	2e-43	MSETLEAPVNDAPSTQIEREQSTALGAGNEQQDTQADTKPEPDAKPQTRREAIEAAVDKAEKSDPAPEAAKKPPEGREAPESKPATEPAEQREAPAEEGKDKAEETEKRQIKAPRRFLAKAQETWANTPNAVKSEVARMERDYEALMRDGMEDRQYRQNLREFEEYAGKSGAKLTDALRLYTDIDRHLAENPVQAIAEIMKRVGLSPEQYSQIVTQNSPQYQALMMQRRAQMAQPQQEPAETQHLRAQLYEEQSKRVHAEVVAPFRTSHPRFDELQETIAQCLNSGMIPQGLSHNERLEAAYDMADRLTPRSMPTQASLAASEQDHSAQTANPRAGKSLSVKGAPSSGISSNPVRRGKLSRREAIDAAMARADRR
13	complement(488236..488601)	PHAGE_Brucel_Pr_NC_019447: hypothetical protein; PP_00592; phage(gi418487850)	2e-07	MIQISEQPRYAWFDNGNGRQVFRRVLPPSLARSDLPCPMIISDTIDPTESMADGNTYTSKTALRRTYRPDGNPQGREYVEVGNDQRPHEQKRGSVTRDRSKSSEIIQKAMATADRGERTQA
14	complement(488659..488811)	hypothetical; PP_00593	0.0	MSKPHDFHRADVRIAYPWPVEVQMPEDVSGVGIDEAIYGEKPAEEVSGSE
15	complement(488804..489655)	PHAGE_Brucel_Pr_NC_019447: putative portal protein; PP_00594; phage(gi418487847)	3e-42	MTPQQQQPPQAPPNPMQMLQQHRQQVEQQVQQQAQQIEQTITIDRVVKFLRDERVRSFSIEIETDSTIMPDEAAEKASRNEFLGAFSQASAGVQQLLQLGPSGAELAGGLLKFALAPYRVGRQLDGLIEQFCQQAPQIVQQQMQAQQPQGQDPALAQAQQQLAQAEMQKAQAQMQRVQAETELKTQQNQLAIAKAQSDAEHRQNTQSMEAQRLQAELQQAQADLQETMANIERVRVETQMLVENAQTSRQTADNDTARVIAEVGAQQFQQDQAMMQPIDIANE
16	complement(489652..491163)	PHAGE_Brucel_Pr_NC_019447: putative portal protein; PP_00595; phage(gi418487847)	5e-131	VDTEQPAFADTLEDVNEPRSSSIVLAAIRAAYQSLQKWQDECERIDKIFSRARSVGGVATYQDPDFDLFWSSTEILKPAVYARAPVPVVGTRFSIRDPFMDQVSDMLERAISTSLDQTCIDEVMKGIRDDLIMTGRGVAWVSFEDSDTPRITVEHLEQTDFLHEPARKWSEVGWVARCAWMTKEEMRERFSDASDMAYQSAAFSSQRDENRHGMTDHSEKAAVWEVWSKSDNRVYWVSDGVDVLLDEAKPFLDLEHFFPCPKPAYATLKRRTLIPVPDYARYETNLEQINDLTSRIYGLLDQVRARGLIAAGSDVGTATQALLAEADDDMMLIPVPASSLVGNGDMIQWLPVEMFANTVQGLIAARQQLISDFYELSGISDIMRGASDAQETLGAQQLK…
17	complement(491163..491462)	hypothetical protein BBK_4338 [Burkholderia pseudomallei NCTC 13179]. gi|556572411|ref|YP_008740792.1|; PP_00596	2e-14	MDGINAARRTLPLCVFDSDTEMTGFSALESYKRKWDDTKKAFSQGPEHDWASHYADSFRYLALSWRRAREVAPAPQTPTIEMVADGLTPPPLRPARRRR
18	complement(491462..492562)	PHAGE_Pelagi_HTVC010P_NC_020481: phage terminase large subunit; PP_00597; phage(gi460042259)	6e-38	VPGHCLSGPTLAQIILPNNWTPRPYQLPLWRYLQAGGKRAFEVAHRRWGKDDVCLHHAAISAHERPASYWHMLPLYSQARKAIWTAVNPHTGRRRIDEAFPPELRENTNDQEMFIRFKSGATWQVVGSDRYNSLVGAGVAGVVFSEWALANPAAWGYIRPMLQENNGWGVFITTPRGKNHAYSMFQHAEHDDGWFAERSTIGLTGALTPEQARQAKAEYISIYGEDVGCAQYEQEYDCSWTAAILGSFYARELSALRNEGRLCTIEAVPGVPVHTSWDIGISDDTALWHFQVVGAQILVLGCHAQSGVGLDYYETYMRDIHSQKCWLKGVDFVPHDARAREWTGGRTRIETMMAMGFNPELVPNVG
19	complement(492520..492717)	hypothetical; PP_00598	0.0	MRAWWYEPFLFACGLATIIGGYHMLGGLMVGGVVYSRAPAMAWQGAKNIAFMCRVTAYRVRHWRR
20	complement(492717..492845)	hypothetical; PP_00599	0.0	MMRIEKPGDYVKVVASLVPSQFQAVDGDGEASGLQIIIRKDI
21	complement(493036..493194)	hypothetical; PP_00600	0.0	MKNSSIWSAFGMAVFLEVAIGATGGLTLAGLGGLLAFWAFVLGVWVSGEEEI
22	493534..493818	hypothetical; PP_00601	0.0	MRLAQGTLRSISRTPFNRLLGERVRRLIERDGRSMEAISLAIGMGVNTVARIVHGHAVKVETLLAVMYELDAGPSDIEAIYADFAEHQREGAYG
23	494007..495143	PHAGE_Burkho_phiE202_NC_009234: gp10, site-specific recombinase, phage integrase family; PP_00602; phage(gi134288747)	8e-24	MSLTIRPRKGRRDLYIRGTVRGKSIYESSGTSDPKQAEAYRAKREAELWAESVYGKRAVVTFAAAVSAYLEAEQRSETTLNHVERLLKHFGKRKLTSITQGDADEACKALLRDGADASPATKIRGVLTPLRAILEFAAVRGWCDKPAFQPPRVPQTKMLFIRPDEAVDLVNEATAHVRPLLVFLIGTGARMSEALDLDWSDVDLPAARAVVWQKQGTERHIDLPPVVVLALAGLPYRSGRVFRPVRSTRGPQGLVMGDAYYDTGRNGGGQIKNAWAYACKRAGLPGRERVWTPKGEAKERRVFVPNLTPHCLRHTWATWHYCIHKDLLKLKEDGGWQTITMVTRYAKKMPDHHREGVIRWLENTDWPDIVYSCQIGAT
24	495198..495265	attR GCCTTCACACGGCAGGGGTCACAGGTTCAATCCCTGTCGCACCCACCATCCTCACCCCCAGAATTCAG	0.0	GCCTTCACACGGCAGGGGTCACAGGTTCAATCCCTGTCGCACCCACCATCCTCACCCCCAGAATTCAG
Region 3, total : 44 CDS.
#	CDS_POSITION	BLAST_HIT	E-VALUE	SEQUENCE
1	1054266..1056227	PHAGE_Bacill_AR9_NC_031039: hypothetical protein; PP_01277; phage(gi100044)	1e-82	MPPSAPTDQIPVTIEEEMRSSYLAYAMSVIVSRALPDVRDGLKPVHRRILYAMRESGFTSDKPYRKSARAVGDVMGKYHPHGDSSIYDAMVRMAQSWSMRVRLIDGQGNFGSVDGDSPAAMRYTEARLAKSASFLLDDIDRDTVDFQPNYDESESEPKVLPATFPNLLVNGASGIAVGMATNIPTHNPGEVIDATLALIENPEATLDDLMKIIPGPDFPTGGIIMGRRGIRQAFETGRGSVPMRARAEIEDIRKDRQAIIITEIPYQVNKATLQEKIADLVRAKEIEGVSDIRDESDRSGMRIVIELKRDATPEVVLNQLYRFTQLQTSFSVNCLALDDGKPRTMGLKDVLEAFIRFREDVILRRSRFDLNKVRDRGHLLVGLVIAVANIDEVIALIRS…
2	1056266..1057105	DNA gyrase subunit A [Gluconobacter oxydans H24]. gi|414342273|ref|YP_006983794.1|; PP_01278	1e-96	MKLDEGDSLVGVATCREGQDVFLATRKARSIRFQITEDTLRVFAGRDSSGVRGIRLATGDEVNSLCVLTHVDASVEERSAYLRAANAKRRAEAAANAAGTEEEIEEIASDDADEAIDAGDLTQERFDELAAQEEILLTVTDAGFGRRSSAYEYRVSGRGGQGIANMTLTNPKRGREVVATLPTLDGTDVMMVTDVGRLIRVPVSQVRVMARQASGVTLFRVGAEERVTSIFPVAESEGTDADDAETSLEESDAAASGAQDTPAPESTASDEATPDDSAN
3	1057089..1057655	phosphopantetheine adenylyltransferase (Pantetheine-Phosphate adenylyltransferase) protein [Ketogulonicigenium vulgare WSH-001]. gi|385234168|ref|YP_005795510.1|; PP_01279	7e-31	MTVQTDLSLDGSRVGFYPGTFDPFTVGHLDIARRALGIVDRLVIGVALNPGKVPRLQLDERCAAIAETFALEGLSAVSVAPFETLMIEAARAHGAHYVIRGLRSESDLTSEMPMAAINHRLAPELETLFLTAREEHRLIASSLVRELLAYGAISAPTCPRISPGVSCPMRQRSRHRPRGLLRPLQTQG
4	1057662..1057946	peptidyl-prolyl cis-trans isomerase [Gluconobacter oxydans H24]. gi|414342275|ref|YP_006983796.1|; PP_01280	2e-21	MSETNNRLVMKLKTGDVVIELRPDLAPLASERLRTLSEQGFYDDVKFHRVIEGFMAQGGDPTGTARAAATFPTSRLSSRAKRSSNAAHSAWRAP
5	1057943..1058134	cyclophilin type peptidyl-prolyl cis-trans isomerase [Gluconacetobacter diazotrophicus PA1 5]. gi|209542722|ref|YP_002274951.1|; PP_01281	4e-23	MNPNSANSQFFIMFQPTPSLDGQYTIAGQVVSGMEHIDQIKRGAGSSGMVKDPDTIISMRPEA
6	1058232..1058307	tRNA	0.0	GAACCGGTAGCTCAGCCGGTAGAGCATTCGACTTTTAATCGAATGGTCGTGGGTTCGAGTCCCACCCGGTTCACCA
7	complement(1058342..1058536)	PHAGE_Azospi_Cd_NC_010355: integrase; PP_01282; phage(gi168495175)	3e-11	LRKAAARRLAEAGCSTHQIAAITGHATLSEVQRYTRAVDQEKLAREAMRRMESVKPKPAIVKPL
8	complement(1058533..1059390)	PHAGE_Brucel_BiPBO1_NC_031264: capsid scaffolding protein; PP_01283; phage(gi100037)	1e-10	MSVIRLRYIQRFKDRHGKLRVYYRKPGNKRIPLPDERDPGFFEAYQRAASTHAVPKPAPPPRFKSFADLIRVWMESARFKQLRPSTQETYRRILYRMQREGWSAYPVSDFRQPHIRKFVSKLSDRPSAANHWLKLFRLLFDHAVEDGWCEVNPAKDVKRLREKAEGVESWTDEQIEQFEARWPVGSQPRRALSLLLYTGQRRSDVVRMGRVHVRGDLIEVQQQKTGARLLIPIHPFLHVEIAAAPEAGTFLQTPSGNAYTPNGFYMRFKDWREAAGLPDGLSLTA
9	complement(1059387..1059635)	hypothetical; PP_01284	0.0	MSAKIQPRLLRTEDAAEYCAVSVSAFNKDVAPHCRKLNPSGVRVAWLRDDLDAWIDWLAGMKAGDIKPAPQVPPINPLDEYL
10	complement(1059632..1059775)	hypothetical; PP_01285	0.0	MNLRAITAALETVLHYARIGASANEASRKECDDATTILRGIMGMLPV
11	complement(1059772..1060098)	hypothetical; PP_01286	0.0	LVNDEEGLIASERLTLSPRFPVHIGEFDNRDGSSRETEPLVPLAKALDYAAALVTAERERCANRLADVAKNLGRHWGSHLTEEGIAIKEACAARVEQEAAAIREGGEG
12	complement(1060127..1060594)	hypothetical; PP_01287	0.0	MTQEQKPESAEFRTREERIDGQIEDIFEIHEAEDAERVISKGDLRLMIEAAHKSAEARGAAEQSRKDAEGQEPVGYVVARLQELFTKPDNPLVAAMIFSSIDAPHIQPLYDRPANIAALEARVKELEAQIGAMQYGTVRQVIHSPLRHFKPEDRS
13	complement(1060591..1060818)	hypothetical; PP_01288	0.0	MTSSTNYHDACKPGVEVGFKRKVHAHLSPGASYEVMCLTTRGSPMIEDDAGNIGFISNEFWNDGGGFVIGSGDPA
14	complement(1060815..1061306)	PHAGE_Lister_2389_NC_003291: helicase; PP_01289; phage(gi17488553)	3e-16	VACVILCRPTKSLGLHIQQVGRGLRPMEGKTCLIILDFSGNTLRFGLPDTDHGWSLDAPANDTKRRASSRGWLCECGVVHAARAGSCAECGRERPAVSGRKEKDELQPVGLEEFDKTKERAWREMAYGDLIKVAKTEEDLRDIAKARGYKTGWVSKAMKEIAA
15	complement(1061333..1062220)	PHAGE_Entero_Arya_NC_031048: hypothetical protein; PP_01290; phage(gi100043)	6e-37	MGSGGDIVNALRSYQKKCVTEVGQQFRLGHRAVLMVAPTGAGKTVMFSHMADTFRSRGKRVLIVAHRKELIKQASSKLRAAGIQHGIIAPWAEQVPELVQVGSVQTLRGRLGRLPRFDLIVIDEAHHSVAGDWARLIASQPQSLICGVTASPQRMDGKALGVSEGGVFETMVLGPTIAELIDLGFLTPSKVFAPSIPDMIGIRTRKGDFDTTQLAKLMAKPECIGNVSNTISVMQAGCRRFVSAPQSRLRKDMPQRFVPLDIDPLPLTAKWKRMIAQRRCPDWKREPSRSSRPAT
16	complement(1062196..1064778)	PHAGE_Actino_phiAsp2_NC_005885: Pas55; PP_01291; phage(gi48697456)	2e-28	VLHAPSRTPGGLSQVRTGVKNVSFEKINAVALPLLRSLVTEWVPGGKFRGKEYVAGSIRGGKGESFSVNVTNGKWADFSSNGTDRGGDAISLYAAVFTSDDQKRAADELATRLAISDETPLPESPRNQPKDWEQVAPDANTLEPNLSRWERAWPYHNHEGRITHYVVRKGNGKDKIILALTWGRKMDEKTGELVLGWHLKQPKAPRPLYRLNGIAKAKSVIICEGEKAADAAQLMFPRILCTTWMAGTNNVANADWSPLSGKKVLIWPDNDEPGHKAADEIASILSGIAASVSKLEVSDLPEKADAADVKLENPAEWLKKRAGSVIGGKEKQVRQPQVPPEVKGRRSANLDPIQVVTGDIDLAAKQGAEALIKSGYVIFRRGKDLVKPGKTKVSAADGR…
17	complement(1064732..1065151)	PHAGE_Pseudo_PPpW_3_NC_023006: hypothetical protein; PP_01292; phage(gi564292520)	3e-27	MTDHTDERSVQTGIRNDLAGTCLAYRANVGTGWTGTGPPLVVDRKMVVSVSPGDVVLRKARRFSTGLPRGFSDLFGGVPIKITQEMVGRTFLQFFAIEVKDDKGRASTEQNAFLKAVKRFGGRSGVARTVEDARRIIAS
18	complement(1065135..1066028)	PHAGE_Pseudo_phi2_NC_030931: endonuclease; PP_01293; phage(gi100011)	2e-40	MTESFKSLTEKGVFKRNKLFSIQIENLHVQSGFNLRENDEDLKSHISDIADYIAKGGQLPPLLIRIAEDGRVMIVDGHCRHAGYTLAKERGHAVDWIDVLPFRGDDNDAVAMIMHSASGKPLTPLETAEGYKRLNDAGMSSTQIAERFGKTRQSVDGLLLVSNAHPKLKELIRTGVVSAAIAATAIRQHGEDAYAWLMTQHEAATSQGKSKITQGTIAANDSGIIKDAAQTDLEDLTGKPGKTSVKSLRAGIATFLESVGKSHLSVDGNKTVSVSVDAIAALKRLLPPDMRMNDGPH
19	complement(1066032..1066739)	PHAGE_Pseudo_phi2_NC_030931: hypothetical protein; PP_01294; phage(gi100013)	4e-08	MTMTSAAIITLLRIREWGACSDGGDWFREKFPQGGDYGTVMTALHEDRRLADATWLADKAFSEAANVSALVRSEITAVQSATKDKDHSGNYARIGCSGANALIGSSGANARIGSSGAYAHIGSSGNDARIGSSGNYARIGSSGNDARIGSSGYYARIGSSGNDARIKCEGKNAVVASAGIGANVTLGKGGCASLVWHDGTRSRFTHLYVGEDGIEAGVAYRLDDAGKPVRVDGED
20	complement(1066739..1066906)	hypothetical; PP_01295	0.0	MSTILCGLTALAVVGFAFGEIRTWVRCCELQAQLRLLNKLKAAHEAGQGRSVGGR
21	complement(1066903..1067103)	hypothetical; PP_01296	0.0	MSAELKQELTEALEALLSDARDLLVEAARTPGRKNLTADELEERGIAPESFAKARAALAKAMGESS
22	complement(1067251..1068189)	PHAGE_Salmon_118970_sal3_NC_031940: major capsid protein; PP_01297; phage(gi100126)	7e-21	METARPVDTTRANSFTTVPHSLTILSTGIRRDNEGRYCLNDCHKASGGDASKAPGQWMANKQTKALIAEIETVEIPTVSETAGKSVATLEGRNGGTYVAKELVYAYAMWISPLFHLKVIRAFDALVQGNTHQPATVIPPEAVTLYQTLTNVGMTAHGMTRKRAVTFANEAVAERYGIDFMGMMGIPKVGVSGRKRIERPTAEEANPKFPEVLANLAAVFGVGKRPFSTAEIMAHPRACGDIARVLGYHVCDADGEISSRRLGRYLLAHSGEQVAGACVAPYGYTRDKVRLWAIDLSLREVCNDTEPDTAAAH
23	1068205..1068447	hypothetical; PP_01298	0.0	MVSGADWGKGASFPQSPLKLAFLCSYLCVRSSVSLARLVNFVYKKIHEYVNDKIYREFQKERKAAHGHRCAAFHDACSSV
24	complement(1068662..1069060)	hypothetical; PP_01299	0.0	MCGAMTVTKDNTDFLLRDDERHAEIRLINNKWNLPSKIEGIVSIKSGKYQRDFKAFGSDSTMLDIDIAEADLKELVAVLSSARSASMTFGKNKTQNIPISGSAEILNGFKDCVRHIGNMDLGDPVGQTNSPF
25	complement(1069365..1070192)	PHAGE_Paenib_Tripp_NC_028930: antirepressor; PP_01300; phage(gi971756997)	2e-33	MTKSLEKFSFEGAPVRVMERNGITWWVLADVCAVLAIRNARDAADRLDDDEKGVATTDTLGGSQEMTVINESGLWSLVLTSRKPQAKRLKKWVTAEVLPSIRKTGQYGSAVGISAAALEQFRTEVMRNRLLPRFFAQDPVVAANEQVKREHDVDFLAALGISNPDGRLLAATSYEAGQISAFVEAFVGEFGVGGDHVTLDTIMKRYYRSAELQESVPKTVPHGVEGNVFSDGLAKFLTAYSFLVVGDCFIEPKPTRKGASKSWRVNRVTPRKRIN
26	1070783..1070920	hypothetical; PP_01301	0.0	LALEKARELLKTGANLPRIAREVGISRATIYRMAARRPEQASAIA
27	1070917..1071219	PHAGE_Escher_vB_EcoM_ep3_NC_025430: holin; PP_01302; phage(gi712913194)	2e-09	MISEAKETGALWLAGVLGAVVALPYHTEMKTKRQRFTFLFTGIATSYYLGPVVAAHFAIAQPVAAFLCGLLAGSVIAKAVNLIASVRVGDFLTGFLGGPR
28	1071216..1071467	hypothetical; PP_01303	0.0	MIILQIVSASVMLAWAVYRLAADKDGLIGKAIYFLSAASCAAMLWPVSMAPYFVEMRHTTLEATCALLIVYHNTLRIYRKCHA
29	1071455..1071934	PHAGE_Salmon_64795_sal3_NC_031918: hypothetical protein; PP_01304; phage(gi100010)	3e-32	MPRLIGLTPNQSAFLHMITVSEIGHPLMDVSDEGYNVVVGSTVARPYLFRSYATHPMRFNPAVKSDAAGAYQVMGRYWAYYKKYLQLLDFSPASQDRIAICLINECKAMPAIEAGDIEKAIHLTRSRWASFPGAGYGQNEHAMDFLIRAYQEAHGRAAA
30	1072092..1072274	hypothetical; PP_01305	0.0	VKLFLYFVVVALIIVLSVDLACFIARWLGGSGVEAGLAVLVIVMFAALCAREKTRLGQKA
31	1072271..1072465	hypothetical; PP_01306	0.0	MSDFLNAAAWFVVTVWFIAAVLIVSGGIGALVVWIGLSFPYGFLAVCIATLFLAVAYLVIDHAG
32	1072455..1072841	hypothetical; PP_01307	0.0	MLAEIKGSITAAKLLAILAVCGLCFWFGHHVAANAGAAKLSAAEAAFSEYRRKEADETATAYQAAQVDAQANAVSLAQTLSDTQDARDKIDAAYKGISHDAQTLPHVSCGLSANGVQLWNRANAAIGH
33	1073337..1073735	PHAGE_Entero_Arya_NC_031048: serine recombinase; PP_01308; phage(gi100001)	1e-22	VEWQFDTASVIQWRQDRAKDAAEGKLDDIEAIEQETARVKLERERLKYATEAALVVPLDQLERRLSVVFAEVKAAMRNLPGRTVSQLLGETDERVFKRTLSEEIDRALTALSEFDTTTLDESLDEDRSGSAE
34	1073707..1075695	PHAGE_Entero_Arya_NC_031048: hypothetical protein; PP_01309; phage(gi100002)	0.0	MKIDLAALNNWRGAARAIGGALQMFRPPPDLAPSAWCEQNLKIPEGNAVPGYYRIMNAPIQREPMDQFINPDCRRVSLMWSAQVGKTMSALGCQAYAIGQRPRSQMMMQPSQGDLKTWLETKFQPMVDASDEVRNLIAKPRGREGVNNQSMKSYPGGFLMFAWAGSTKTMRGRSAPFIVCDEVDGYRATDEGHPVSLLWQRSATFGDDRYLLEISTPTIKDASYIEAAFLAGDQRYFQVRCPDCSELQALHWANVQWVGRRSSDLADAEKDAEHDDHEPDTAAYTCEHCGSLWSDGQRIKALRDAEAVGGGWKATRPFKGHASYHAWEAYSTFRKMGDIVRDYLDKLKVDDLQSFANVSLSRTYEIKGDGAEAGTLYAVRYTFPDHLPDGVLYITLGAD…
35	1075692..1076180	PHAGE_Entero_Arya_NC_031048: hypothetical protein; PP_01310; phage(gi100003)	1e-21	MRRIRLPDTFTGGTTFHVETGDNVTLYLRGPGSINLQSVDGFIAVSASDTANWLAGSYAYSLRFLDISGNVSEISSGTIQILADIASLPAGSDTRTQNRRIYDAICAVIEKRASLDQESYRINNRELKRAPLADLLRLKTRYAALVRAENGRGGIREIRVTF
36	1076180..1077745	PHAGE_Entero_Arya_NC_031048: hypothetical protein; PP_01311; phage(gi100004)	2e-107	MGVFDFLKRDTKQKRDMMPGTAIPGRRARNAMRLVGGIDAARVDRFAETWPGTPVTPDEMLMLWHRILQARSRDMAINDPYMRRFVRGVRANVIGHGPKLRCATKIASTSKSDAKTNTAVAQSWEDWGEAENCDVTGAKSWLQTLLLAASTLAIDGEVFVKTVSSGPFGLQLQMIDAVRCPVDYQLSDTGKGTFIRCGIEYDQVEKPVAYFFTSDDDHANYYAFDGRRYERVPAAEVCHVYRHDMVGQRRGFPWAMSALFRLKRLKGFEDNAAMNAEVGAGKMGLITWDPDSGPEADDDEEIRITAEGGTFLELPAGANLSKWDPSFPDGVIATFTKSLLRGVGAGLGMNYPSLGNDLEGVNFSSIRAGTIEERELWKEDQKLLIEGFCIPVFRRWIAE…
37	1077742..1079679	PHAGE_Entero_Arya_NC_031048: putative Cro/Cl-type repressor; PP_01312; phage(gi100005)	1e-160	VNIEGIITRLNKDGGSVRAAVVEGVNREERTVELAFSSEGAEVPRWFGREVLGHDPGEADLTRLNDSASLLMDHNTRDQIGVVVPGTARIDNDGKGRATVRFGRSPRADQIFNDVADQIRKHVSVGYRVTGMKLVETREDGEDVYRITGWEPYEISFVGVPADHSVGVGRNYSHLSVEPDEKPVENTASKSNSSADTAQTQTQARSQVDENEIMVRARSAEQKRVKDILDLGREYNASDLAAEHAGNPDGSVESLQRALLVRQGKEAPVGRKNSDVGMEKRDLANFSMVRVARALANPQDRKAQEAAGFERELSEAARSKQVKQDSGNWVIPSDVLRSAVFEGFEQAQRDTGMSLGSNGQTGSGATGSSLVATNLLASSYIDILRNRATFTHGIAMLGG…
38	1080053..1080604	PHAGE_Pseudo_PPpW_3_NC_023006: putative minor tail protein Z; PP_01313; phage(gi564292490)	3e-10	MDLEIKIDGFKGWGDFLPIIDAIDPGGKYIERAVGSTNLRMSQWVVTRSLRGLSALLKIRQSIIRRRLKRFRIHGDISGAKVWYGLDGVPFTDLKPRKGAKGVITGDGAYYEEGAFTTTSRRTGRLRVLKRKGKNRYPVDDVNVDIDQRALAFIGRHVLQTNEFENRYIERLEQELKWRTRTT
39	1080583..1081140	PHAGE_Entero_Arya_NC_031048: hypothetical protein; PP_01314; phage(gi100010)	9e-26	MADPNNLTTDLEALHNAIQSQIAAAFPALQTIEFYRDDEDENIQLPACLIELDEMENRDEDPGTGQICMSLRFSARLILTRENGPDAPMQARLSAAALSAFINKNRFGGHASPAHVLMGSRDDFSPSLSGRFSIWRIEWVHREAFFGASVWSGGSIVPQTVYLGRAPEIGPDHIGDYKEIWKSGA
40	1081254..1081727	PHAGE_Pseudo_PPpW_3_NC_023006: putative baseplate assembly protein V; PP_01315; phage(gi564292492)	1e-17	VTDWLYWASRRAYDAFDYDSLTVGEQVIVLSLWGDVSQGVIVGAVPQDAQVAPASGNVWGKRFKDGSTITYDPDSHALLVQAGSSPITIKCQSANVQATDSVTLDTPKVHVTGTLTVDKDVSIGGGVTAQGDVMGGGKSLDEHVHPIASSSMTGPPK
41	1081814..1082143	PHAGE_Entero_Arya_NC_031048: RecT family recombinase; PP_01316; phage(gi100012)	9e-23	MNRENGKVLQGTDHLLQSIVDILTTPIGTRVIRRDYGSRLQELVDSAMNKSGVMDIYAATVEALSNWEPRISVTKVNVAPYAGGITIDLYAKDTESGTSLTITGIEVAR
42	1082140..1082613	PHAGE_Entero_Arya_NC_031048: hypothetical protein; PP_01317; phage(gi100013)	7e-40	MTTQIYSAIDLSGLPAPQIITDVSAETELSELLADFTARYPAYSAVVESDPVQKLCEAFAYRLSVEKQARNDAFKAVMLAYASGADLDQIGANYNVARLTITPADPSTIPPTAAVMETDDNFRARIQLSFESYSTAGSEGGYAYFAKTASAQVLMCR
43	1082751..1083044	PHAGE_Entero_Arya_NC_031048: hypothetical protein; PP_01318; phage(gi100013)	3e-18	VQSATILPFAISAVLTLYPGPDASVVVAAAQAAAQAYADRVHKIGYTVATSGLYAALQQTGVEKVVLDGWAGDITAAQDQAPYCTGIAVTTAAETNV
44	1083168..1083563	PHAGE_Entero_Arya_NC_031048: replication protein DnaD; PP_01319; phage(gi100014)	6e-22	VVAWLAWAWRVENWATDWSELQKRQTVASSYMVHRKKGTAYAVRSALEALNLNIQMLEWFNDSPKRDPYTFRLVVKIGSNDISIQNWKSVLNIVQTNKNARSHLSSIDMEGESEGISYHGGATCYGITINV
45	1083572..1085167	PHAGE_Entero_Arya_NC_031048: hypothetical protein; PP_01320; phage(gi100016)	4e-68	MTNTYTTIKTNAGLALETSSQAGGDKITLTHMAIGDGGGSAVTPNADQAALVREQVRLALNAIAPNPDNASQFTAEAIIPASSGGFTLREAGLYTADGVLFAVANLPQVYKPTATEGAFGQVVVTMTFIAANASEVNLTVDENVSVATRLWVQNYVIPAHVFAGGTSGQLLAKSSNEDGSWTWVDPTASVHVLVDTVEEDQILAANQTAITLSKVTANGLGVFVNGIRLRDDEWSKVDDTHITLKQARNDGDRITLLQNEQTGYSDVLRASRNLSDVDDADVALSNLSGLSLKGGRVAGGFAVDSGKIELNGQAATTRMIAMQSNNNNRFAIALSPASENGGNAGSDFTITRYDDNGAELDSPLSVKRSDGSVNVGALTCADVPNLQDSSNNAANTRFV…
Region 4, total : 20 CDS.
#	CDS_POSITION	BLAST_HIT	E-VALUE	SEQUENCE
1	complement(2570821..2571912)	PHAGE_Vibrio_nt_1_NC_021529: gp36+37 fusion long tail fiber distal subunit; PP_03038; phage(gi514050719)	4e-05	VKRFLILAGLLPAIACAQTQTTKPQFVPPNGLPLNTPLGTARNADGAGVTTFATMQAGIDAAVTPSELTEALTPYLTQASAESQYFPLTGGSVNGDVTFNGKIYARGYVSTPPNDQSAYMCADTGTGYLYPANAPCIPSYVDPRYSTPDQVSSAVDAEKTRAMSVEEGLQTDLTNVSENYVSNSDFSAAIAPYLKSADAASIYLTQGNASSTYLTQTNAANTYLTPSSASGTYLAKSDAASTYLTQTSAASSYLTQAKATSTYLPLSGGSITGNVVLSGYVRILSGGYLWLTNPTQDANNQNIYISFDSSDNSLYFTNRGAQASNYLTSKFNILKATSMTGTGNAYACVNSAGQFYRSTSACQ
2	complement(2571909..2572355)	hypothetical; PP_03039	0.0	MALQPPLAWPDNNINGGADYSVDFSAILGPGESVQALAFDAGSAGSQSWTYLSGTTVTAWIKWVQSGAIPVTVCVLGSSGATYQATVSIIVSSTPSLVDASPPSAPGIDISAVNSATMSAWLDSLPTSPPSGGGWWNNANIPTYEAPS
3	complement(2572433..2572687)	hypothetical protein [Frateuria aurantia DSM 6220]. gi|383316770|ref|YP_005377612.1|; PP_03040	1e-11	VSNGGYGSLIDLSTVTEDSNYIPAPTLAKQASDELSSARGYVYNNYGILNEATPDAWVSYLKSLMAIANGSDTTSTALPKAPTA
4	complement(2572770..2573207)	PHAGE_Entero_SfV_NC_003444: tail/DNA circulation protein; PP_03041; phage(gi19549005)	8e-05	MGKQGRQYHVSGLLVGPACYAQRDLLVRAAEIEGPGVLVHPTVGLFRVSLMRLEWRERDGMSNVIDLSFDFIEKTDLLGGLVTTALHAAIGVASALLRSSSLSDHRAATAAPFRRGTCLTITRSLLACSTTMKSRILTCRQTLSQ
5	complement(2573212..2575551)	PHAGE_Haemop_Aaphi23_NC_004827: putative tail length tape measure protein; PP_03042; phage(gi31544043)	8e-11	VAGKSVSVAITAQDRASSTLERINSRLAHMQVPARRTFGALQRFSQVSGLTRLRGGLSSVAREGVSAFRSIGQIAPVLGTITGATSVAGVYRLASAWAKMGTEIRTTSHAIGIAPDRLAKLQNAARLSGGTGEAVSGALQSLSQTQWEMAHGFAPEAQATFQALFKGTGASLKQVEQMKPEELFDRLIKRLRGIKNPAAQAVAAQKLFGGAAAGLLPILQQTEKDYQANIRLSERYGVNNQKGADAAANLQRSFTGLALAGEGLGFSIAQAIEPRVRTVIDAMSGWIAENREWIALRIGRIFDQVADAVGRVVKWLQDGGWDEITGKIGKIVDTLGGWRQAAIDVGIVVGALYAAPALAGLAAFAASVLSIYRAFQKVTAAAEAANAAANPVASAGKKS…
6	complement(2575669..2576334)	hypothetical; PP_03043	0.0	MNTPTDAEVMAALADAAQENETSDEGRLVLTFEPAISVKGNEYSRLELSEPCVFHVLEASKKIGNRPTQETVYDSQIDLVARVSGWPLTALHALPSRKLDEAIIFVTDFEEKARRQPDEAPSYDDERVLFAKREIEAVNSLWRDMTLREPSVAERRVFKVAQGKGNVTAYMRGEMQLVSSISKWPDAAILKMPISLFARAADYCTGFFIPGPQTGSSSAQT
7	complement(2576331..2576714)	hypothetical protein Bxe_A3054 [Burkholderia xenovorans LB400]. gi|91782771|ref|YP_557977.1|; PP_03044	3e-11	MSESAYRGPLAGTATLTINGETWNIVGDAQWQATGFANETLKGQSATEGFGRMPQQGFFQATLRDRRDRATSNFQGASGLDITLEQANGKIITVVAGWQTGEITVNTQEGTFELHVESDIVTEDTVG
8	complement(2576780..2576965)	hypothetical; PP_03045	0.0	VADGAKASAGTKVMTAQLVGKYCAARYRWQEAQYWVQNGDYFAANIVAQCRRGRGQADDAL
9	complement(2576958..2577272)	PHAGE_Entero_SfMu_NC_027382: tail sheath protein; PP_03046; phage(gi849255269)	8e-11	VALSMRANPATPVTALALNALPPSDAGRFTFEERNSLLHDGLSTHLVGDDGTVSIQRLITTHQKNAAGQPDNSYLVSRHDAGHGLPSGHGGLSGHPVSGRHSGG
10	complement(2577502..2577810)	PHAGE_Entero_SfI_NC_027339: tail sheath protein; PP_03047; phage(gi849250296)	7e-11	MVTTGDTAATIAGNVVAASEAISGLAATIASDGPVPGVVKVTALNKGLACNDTRLAVSLLGTAGGQSVPKGLTVTVAQMAGGTGAPTALPGALAPWANASMT
11	complement(2577804..2578199)	PHAGE_Salmon_ST64B_NC_004313: Tail Sheath protein; PP_03049; phage(gi23505458)	1e-08	MSDTITIPGYSADNRVPGVYFALDNSRANTATAARRVLVISGKLATGSATSGVAELSLGATDAASKYGVGSQAARAVAWYRAIDTQGELWVMSLDDDSAATAASGSFTISGTATARARCRSMWAISSSIRW
12	complement(2578196..2578396)	PHAGE_Entero_Mu_NC_000929: hypothetical protein; PP_03048; phage(gi9633529)	1e-07	MRVKPAEGRAVRWPGTLRLLEDTGEDVPETAFWLRAKATGDVIEAAASPEVIEPASGRKSAAGGKE
13	complement(2578408..2578935)	hypothetical protein ROD_25921 [Citrobacter rodentium ICC168]. gi|283786262|ref|YP_003366127.1|; PP_03050	2e-17	MTIPYRLLLRETACAVLRASGTDAGEKVFTARSTPTSVESLPQIVLQVPIDHGESLGRSAPGLTRVACLVVVGKVSHKSEDKTQLALDRLGSQIEYALMQSPDLQRMIQQVTELDIRTQIDASSETFLGMVTVRLGLEYTEYFKVTGLPLKQIDGHLSANGNDDFADLRVTFSNK
14	complement(2578904..2579263)	hypothetical protein Bphy_1881 [Burkholderia phymatum STM815]. gi|186476636|ref|YP_001858106.1|; PP_03051	1e-11	MIDFDGLTLGPCMQAYGEEVLYEPTDGPSYHIKGIFDDTFVPTLPDDGTELTPSHITSYSAVLGVQLSQMHALPVKDDGLTVREQAFTVREARADGRGSMLLMLKFRDVDDDPLPPLIA
15	complement(2579260..2579481)	hypothetical; PP_03052	0.0	MSTETRTVTVRVLPGRVFIHDDARVDEGDVITLSAAQADTLIKGGHVERVDDVEPEEPKKKSGTDKTQEQGAT
16	complement(2579485..2579715)	PHAGE_Provid_Redjac_NC_018832: capsid protein; PP_03053; phage(gi410490797)	1e-11	MIPDGTVLGVSDQLNGTRAYGAIKDPEFAYGAMAYAPKSWTQKDPAQRFLMLQSAPLVIPSRVNACLAATVTSAAS
17	complement(2579712..2580539)	PHAGE_Burkho_AH2_NC_018283: major capsid protein; PP_03054; phage(gi399529101)	3e-26	VNAISIYDTNVLVQVIANLKTAQTFFLDGFFGNIIESDTQYVSIDVDVGKRRMSPFVSPLVEGKLVEQRRIQTNVFEPPYVKDKRAPDLMRPVRRMLGERIGGGPMSAAERMEANLMFELNDQIDMLKRRQEWMAAQALLTGKVTVSGDGFPTSTIDFMRDPSLTIVRSGASMWDAPNSTASPTDDVTAWSAAMLKASGANLTDLSSRTALTMRCSKTRRSRPPFSTLPSGRMTTPISSSAPRWRRVLSSRVTGARSASGFITTGMSTKTTRNSR
18	complement(2580552..2580971)	PHAGE_Aurant_AmM_1_NC_027334: head decoration protein D; PP_03055; phage(gi849119857)	4e-08	MSDSITQGIYPQTPGAFDATFLPDQLIAGVFQPVTGNVTLAGGNGVLKRGTVLGAITAGGKHVPASSSASDGSQNPVAILADTYDTTSGDVVGAGVYLTGEFNINAVTLGAGLTPEAATAALRPLSIFLKSAVSAADPS
19	complement(2580968..2581582)	PHAGE_Ralsto_RSL1_NC_010811: hypothetical protein; PP_03056; phage(gi189427003)	4e-07	MIGNYKFGHLFGGSSLSSSAASRVDPVLPHSVAARRAEDDDNEPNHPDPETGKRGKKGKKARRAEEQDDETGAEEGDDETDAEDQDDEDTAKARARERGRIAAIMSSNAAAGNPILALDLALNTRMTREEVVGTLTRTGASLSPAPATAQAETPLSQLDARTDPRPHGPCTLRGRSQPPRPEHALRCGSPPERDPSSDDRTLTP
20	complement(2581653..2582468)	PHAGE_Provid_Redjac_NC_018832: ClpP; PP_03057; phage(gi410490795)	1e-43	VKGSLAAMVQPSLFLNRPIAFAESSLALLRLAFESGGSAVALLGERLSEPAPYEVIKGIAIIPVTGMLLPGSGLSWSEATYYQDIRQSLEAALEDPAVRSLALLVNSPGGTVSQCFDTAELIYQARGSKPIWAILDDAAYSAAYAIASAADFITVPRTGGTGSIGVVGMHLDVTASLADAGIKVTTFQFGERKTDSYPTTAMTEPARTRMQADIDELGEMFVALVARNRNISPESVRNTQAATFLGEKGVALGLADRTATPQEAISALLKV
Asaia bogorensis NBRC 16594
Genome; Raw sequence .3198265, GC%: 59.81%, length = 3198265 bps
Total : 3 prophage regions have been identified, of which 1 regions are intact, 1 regions are incomplete, 1 regions are questionable.
REGION	REGION_LENGTH	COMPLETENESS	SCORE	#CDS	REGION_POSITION	POSSIBLE PHAGE	GC_PERCENTAGE
1	33.5Kb	questionable	70	25	48333-81894	PHAGE_Burkho_phi1026b_NC_005284, ......	60.80%
2	48.7Kb	intact	120	20	1535418-1584181	PHAGE_Salmon_BP12C_NC_031228, ......	57.77%
3	12.6Kb	incomplete	30	22	1693290-1705925	PHAGE_Mycoba_Shipwreck_NC_031261, ......	57.97%
Region 1, total : 25 CDS.
#	CDS_POSITION	BLAST_HIT	E-VALUE	SEQUENCE
1	48333..48344	attL ATCGTATTCCTG	0.0	ATCGTATTCCTG
2	complement(48625..49620)	PHAGE_Pseudo_D3_NC_002484: integrase; PP_00040; phage(gi9635596)	5e-24	VSSNLYQAANGTYYARIQIKGRDIRRSLRTTDRRTARQRLKELLEKAEDQRAGLKPPEVRNWEDAVVRWEELQFADLRPSTQTRYRTSLRQLHPYFAGRDISLITSRDVHEFVAARRRTKTSGATIRRDLMVMGRIMRVARRAGWITANPVPDEMEEIKERREPIRPVALRDLARLTRRAPPGMRDMIRFLARTGCRQEEAASLSWEQLDLNAPCPTVTFARTKTRSPRVVRLSPRQARELQRSRPENASGYVFRNPSGQRYTNVPGRFRVLLASAIPDKARHFRCHDLRHTYAIRALQQGASIYDVSQQLGHSSVKTTEIYAAWLSRRIR
3	complement(49793..49969)	hypothetical; PP_00041	0.0	MTKMLWSAIARNPITACLILFLLHQTVSSARIWLRCRDLETQLRTLDALKTSDFEEDS
4	complement(49966..50271)	hypothetical; PP_00042	0.0	MSASPVQTVFLPDRPTTPPLTGRDTIKAKRAMASYMNSLAEQAGFAGRTAAERLWRNAAADKRHEAEQMERAAQGRSIIPDAPNANPVLALLARHGRLGRS
5	50396..50524	hypothetical; PP_00043	0.0	LLFWREVASLYKNLTLLFGLSFHFCFGLVSGQKPANRSAQSF
6	51000..51593	PHAGE_Aurant_AmM_1_NC_027334: hypothetical protein; PP_00044; phage(gi849119911)	9e-13	MQHENPSCSAGYWLHVAPSSEGCPGKIASLPTGLHRIEGPAMTTHAIKTATQAVIRAVGGVDAAASFVRVGRSQLSDYQNRHSQSVVPVDVAIEMDRCAQEPIVLAAMALAEGYILTPLKVGEGDLAIDIEKVSHSFNETIATTLRVLADGVVETHEVTAMRATLSSLHRAVGHALHNLRATEKAMEEPVAALRGVS
7	51590..52183	hypothetical; PP_00045	0.0	MSGALASARSLGLRGKSASSGEQAQANAIFNRLCRTRIARVALAGLIGRQPGTVVKWHQVPSNHVRPFLRAYESGRLERAIRAMSPVVTSAECRQARDIVRRIRARRGGKRVLGEALKVAPDSVKFWNEIPLRHVRAVLACLGADRGLAESDVPPVKPSASTAQVSGVWHRKCLYCGADFSVNSPFIRRCETHRGQG
8	52183..52377	hypothetical; PP_00046	0.0	MARPALDRTRLAPAVQGYHRRGFPARLIAMRLGISERTTRGMLKALGLTAPRPQSRQIMEIRHG
9	52370..53902	PHAGE_Strept_315.1_NC_004584: putative DNA polymerase III delta prime subunit; PP_00047; phage(gi28876155)	2e-55	MGDVQPLGHLASVNEPENMQAEAALLGAILTNGRRALPMVEEYLRPEHFYEPLNGVIYAAALRMHMAGVEPNVILIRNEISDSEVLMGRDVAEYLGQIMMATVGILNAGDYGRAIFDAWTRRQLRNHCIDVSRLCLTPGGQTGEDLVEQMEAGLLEIAQNMRESLPNVTISEAIREAIACGQENLLRGSALAGLSWGYPAMDRMTGGLLGEGLYVIGARPAMGKTAFALGVAMRVAALGERVLFWSGEMAARQIGARAGAAYAGLSTLSVFAGRRYDIPEDIETGLRVPLDGWQWQDLQAGEKAAEAVPLELDVRSGLTVAGLRSRARRMRRSKRGLGLIVLDYVGLMHGSDAARRRGRYEEMTEISAGLKSLAKELGIPIIALAQLNREVEKREDKRP…
10	53899..54207	hypothetical; PP_00048	0.0	MTRPASPRPVSRRRYGIHARAIMADPRWSVLPLAARGMWLHLADIADVVTELRAPVRGQALTVPDLARLLAADPAEVIGAVSHLVNRDIIEPVADGYRLKAY
11	54209..55189	hypothetical; PP_00049	0.0	MSKSSIERRALAMVASDLRLFTLAAEAVVVWVRLISAILEYGADGILHAGKDGAPDLAALARFRFHVTETQLETYMETYARTRLITYDAASGLVGLPETLQPTRRAIASRLNGKKGGRPPKNVNPSPQHDPRQRTAMMPISGGKTVSCETQHKTQGSYARDKLGLACNISSEDKAKLGTQVSDAQIDTAYQRIGPMAFEAAGFDPARDMGNYRVVRQWVADALHDGLSPEETERLILGVVESVAERQRSKGASISHLGYFGKAIGTAIANRDVPDAPLSEAEIEADRAWKRDMDTWRERVASGVAGAVNEPIPNRAEYLERVRVAA
12	55186..55662	hypothetical protein Mmc1_2067 [Magnetococcus marinus MC-1]. gi|117925357|ref|YP_865974.1|; PP_00050	4e-08	MSKMPLRFDPERSLPEQVGEWLDEAALTLAALPAAGLRPAGARSTWPDYLRDLEDLGWDRESDEFLPRPTADQIDRLDNVLTWIPLVEDRKLRTVVNMRLIVHRISGRHKWEWRKIGPKLGVDHKTAQAWHQRACVVIAKKIKPSAFSTTHIPQFADI
13	55737..56057	PHAGE_Mycoba_Bernal13_NC_024135: HNH endonuclease; PP_00051; phage(gi640883745)	4e-06	MAVRGLQCVLPAVRSVKTGIATALPKQAKTIYLSPEWRGLMSRLLAQRGRRCEACGRTGCRIFGDHIHELKDGGALLDPGNVRLLCGSCHSTKTARVRAIRWRETV
14	complement(56066..57289)	hypothetical protein GbCGDNIH1_0407 [Granulibacter bethesdensis CGDNIH1]. gi|114327071|ref|YP_744228.1|; PP_00052	2e-28	MASRLISERHPWVKYLALISMGVAIYAGAIWISFSLIVALAWGAVIAIAVRPIQRKLGQFIGAKMAAISLIGLTCVLFTIMAGIAGYGAVTEIGSLSEKAHHLIAPHPTSAPANGPDAAAQDRAASPQNDESAGKPEPTDHNGEEAGSGDSATPALPPAVSTRIDKVKSVLPASLANKIDPQQIMKMAKAQAKSVSKIAGLAAFKILKSIPHLLEAFFIAMLTAACCLLSYGRVTSSLRRVSIELTQRDDILLHIVRSIRGAVNGLVLVGIGEALVCSPLIFIADASHAVILTILLAIAASIPFCGYPAAILVGGIVAASGSMNMGIAVAGWGLFVLFCGEHFARPKFISDETRLPFLHTMIAILGGLHMLGLVGLFIGPAIVAAAHMLWCELDGSRRG…
15	complement(57345..58799)	PHAGE_Burkho_phi1026b_NC_005284: gp59; PP_00053; phage(gi38707949)	8e-67	MTKDPSSHPHLGWFKHRRQLNHQDITVVDSDMLRRAVGAAALGNAMEWFDFGVYGYIAVTLGKIFFPDTDASISLIATLATFSIAFLIRPIGGVIFGPLGDKYGRQRVLAATMIAMALGTFAIGLIPSYATIGIWAPIALLAARLVQGFSTGGEYGGAATFIAEYSTDRRRGLMGSWLEFGTLAGYVAGAGLVTLLQVSLSEETMLAWGWRIPFLLAAPLGLLGLYARTRLEETPSFKAYALEAEKRENARPGWRHLFAMHWRQLAKCVGLVLVFNVTDYMLLAYIPSYMTVSLGYAESKGLILIIVVMILMMPINIIGGFLSDSIGRRPMILGASAALLLLAIPCFHLIQSHSDSLIFLGLMLLGIALAGFTSSMPSTLPALFYTPIRYTALSVAFNL…
16	59131..59481	hypothetical; PP_00054	0.0	MAHGGARPGAGRKKGSRNKKQVDWNGPLVVDPSALAPGLDALSGMNPQDLASCSPLAFLTHIYRNRGLAAAIRADAAKAALPYAHARLAAPRDDQPALPGLDSGWGDDLPPINRRN
17	59484..61184	PHAGE_Entero_BP_4795_NC_004813: putative large subunit terminase; PP_00055; phage(gi157166040)	2e-139	MLDLSRKDWEARVRAGRSLLPDLKPVNPDLAARAVRCFDRLRIPDVPGTPAMAQACGDWFREIVSALFGALDPDTGVRAIQELFLLVPKKNSKTTNGAGLMLTAVIVNERPNAEFLIVAPTKEIADLAFSQALGMVQNDRTLMRCFQVQQHLKRLRFHATGATLQVKAFSPDVMTGVKPAGVLVDEQHVIAMRNDAGSVMRQIRGGMISQPEAFLAIITTQSDGPPRGVFAQDLIRAREIRDGKRFQPVLPVLYELPPDIQQPSKLPGEAAPWEDPAYWPMVLPNLGRSITLDRLKREYEDAREKGVGELASWASQHLNVEIGLALRSDRWVGADYWQGAGDDTLTLEALIERCEVIVAGIDGGGLDDLLSLAVLGRDTITGQWLHWQKSWVFEGVLAL…
18	61181..62020	PHAGE_Pseudo_phi2_NC_030931: terminase large subunit; PP_00056; phage(gi100031)	8e-49	MSIATRLRGMAYKAASAAFQSVTGVPLTDLRLGAFMAGGPSISGQRVSVDTALQLDTVWACIRPLSETIGSMPLKLHEQQGDGQSSLARDHPLYRVLARAPNADMTPIEFWSCMAACCLAWGNGFAQIMRRGDGQILALNPLRPDRMTVQRDPSTGAVVYRYSYQGKTLVLDEGDIFHIKGFCFDGLMGISPITAGRQSIGAALAAEETAGRMFRNGLLSQTYISAPTYLSAAQKEQAKAILADYSGAINAGKTPLLEGGWKVESIGLRAEDLQLLQTR
19	62054..62506	PHAGE_Entero_HK97_NC_002167: portal protein; PP_00057; phage(gi9634156)	3e-31	VQPVMIGAMEKSTAWGTGLEQMNLWFLQYGLMPWLQRIEQAVSRCLLSPAERDRYFARFNVDALLRGDSTARAGYMQTALRSGWMTVNEARANDNLPPMPGGDVLMVQAQMIPLTDIGKPRNLTATSGQDPPASNRPPGTQSGITGDDNE
20	62499..63128	PHAGE_Azospi_Cd_NC_010355: phage head maturation protease; PP_00058; phage(gi168495135)	1e-20	MNDYLAAAFEWKFAPDAKEGSFEGYGSVFGHQDAHGDIVLPGAFAETLAERKAQGRSIPMHVMHGILGGDGLPVGVWEDASEDAHGLHLRGRLSGMDTDYGRRLYGLVKDGALGGLSIGFSVRKNGATPGTDPGGPRRQIRAANLHEVSLVDDPSNALARVTEMRRRFYPVASLPPEQSPELRTAERELIEALRSGFSLPDPRRVCRSG
21	63204..64409	PHAGE_Pseudo_phi2_NC_030931: membrane spanning protein; PP_00059; phage(gi100033)	3e-74	MSDYEQAARDLKAATDEVKRFAEASTTELRNLGKVTEETKASADKALAEMNGLSARLGDLEQKAARRSDTAESKSLSLGEEFMASDAARNLKSSFQGRVRTEMERKALTTGPATMGATTSAGTSLIPAMRLPGIDMIRLPQPTLRSLIPSGATSSPIIEFVRQKSFINKAAPVAEGAAKPYSDVSFELSRANVAVIAHLFKASKQALDDAPELVSIINAQGVAGLEQVEEYQFMYGDGTGANVLGLMKQATAFAAPAGLTVPDAALDTIRMAMLQASLALYPATGIVLHEIDWFRITSVKDGIGRYVLGDPQSVATRSLWGLPVVVSNTIRQGDFLVGAFATGAQIFDRQSVAVEVATVGDDFEKNMVTVRIEERTGLVVYRQQSFITGTLPPDATAAK…
22	64422..65081	PHAGE_Azospi_Cd_NC_010355: hypothetical protein; PP_00060; phage(gi168495140)	9e-05	MTLTILEAPDKNLPLVSLDALRDQLAGEPGGQNNDPALNEYLAQATALVQATLGRPVLAGLYRQTLRVGDGERRLSLALTASPVVEIVTVTQDGFTLDPSPEGWECAAWSGLLYPSHLQGAWWWPGCYRVTYRGGWIVPGMKDDQGEPLAPTVPADIRAATLSTARALFFTAQRGDPLLRSESEQGVGASSWATPDASLGGLPPDAASILARYAQAGLS
23	65078..65401	hypothetical protein APA12_20110 [Acetobacter pasteurianus IFO 3283-12]. gi|384043001|ref|YP_005481745.1|; PP_00061	2e-27	MSVGVSRRRRQILRAGRCMVLSRADLSESLTVLGYALPPQAAQLAEGAGKAPFIAQITADETSRSGYRPRLRDTLRDGPKTYTLTDASPVYDRGTLCGWTLIASGGS
24	65401..65826	hypothetical protein APA12_20100 [Acetobacter pasteurianus IFO 3283-12]. gi|384043000|ref|YP_005481744.1|; PP_00062	5e-20	MLSDTVWNDAYARASRVADQQSLPLVDVLMQPAEERPDIHWRMETQTSRSDRLGLGESAMEEEGEIALHLTMRVSRISTPDALTLCKTMSTMFRAQMREDAPWPDGLFYDGQSLYPPDPDATGNWISMSLMIRYRYQVYL
25	66383..66928	hypothetical protein APA12_20090 [Acetobacter pasteurianus IFO 3283-12]. gi|384042999|ref|YP_005481743.1|; PP_00063	1e-14	MKFFPLVETADNSGLFVLTGAVFDASSASIALDKVAASVATGLRVAVSPYRAMGGIPSPITPSRAEEGASYVLLVEQEDEPGIFASDGQYLTSQSSDAAPLALTLQLCYGRRVALMRHQPEDRPDATTPPEKTSSTNNASGSTGPSSVTSAGSSSNSGASANAGSAVNSGGSSATPAVKGA
26	66930..68129	PHAGE_Pseudo_phiPSA1_NC_024365: hypothetical protein; PP_00064; phage(gi658307746)	3e-06	MAFSGATAGFQVGVQANDTILAYAREVTYGVAPSGPYQRLRLTGESFRRQNTRQRPEEINPNWEASQAVTTQQAVGGTLSGALSFGSYDVLLACACSGTQNDRSVAFPQGVRIDLNAFSWSGGKVVLATIGQAIWNVLPSVGFVRLRSPVDKIDAIFPYEARGDFLDPAEGVFTTGRGLLDAGASVQCPRIVNGATFNSLTFIEQLGDETLVRTGGFVKQIQISIAQGQFATFSADLDFRDEQRVTSSPANDLLPPTDSFVLDPVKGWGSLWLDRKRVTAPIRQFQLTITRDGAGQDFAMGSVAAVGQRPGSFMVSGQIQLFFRDSTEYQKFQDDWQGAVQVLLKDKKGNGYGLTFYNASLQNPQINAGSKNSTIVATFDIEGNPRPGGGTFALSIFPA
27	81894..81905	attR ATCGTATTCCTG	0.0	ATCGTATTCCTG
Region 2, total : 20 CDS.
#	CDS_POSITION	BLAST_HIT	E-VALUE	SEQUENCE
1	1535418..1535431	attL ACCCAGCGCGAGGA	0.0	ACCCAGCGCGAGGA
2	complement(1542396..1543142)	PHAGE_Mycoba_Bobi_NC_022055: integrase; PP_01418; phage(gi530545402)	9e-14	LGHLRIDQIGQKRWDTFAAGRFKKRGEANVPISPGTLRRELNVLRAALRRAWKDGYLVRPPEIEPPRDSAPRDRFLAKVEARRLIDAAQTPHVRLFMALAIYTGARKGSILALTWDRVHWTTNMIDFQEPGRALTRKRRATVPMTKALREEMEAAFDERNGDYVVNWHGKPIPTGLRWSFNKACERAGLTWKPTPHHLKHSLASWFKMDGVPIDQTSDWLATDPQTLRRVYRKFDPSYLENIAEGFKL
3	complement(1543542..1543790)	hypothetical; PP_01419	0.0	MIVSRGRTQESVAIEAGISTSTLSFLIRGQNSTINTVLSVLATLKAPPEVMAEIYANFVEHRKERADGCGIASAAYRQESSL
4	complement(1543837..1544025)	hypothetical; PP_01420	0.0	MSDNAWNALYLATAITMVILWFATTEVRSYLRRRDLRVQLRLLDHLQALSCQHQHTKQGKAQ
5	complement(1544022..1544186)	hypothetical; PP_01421	0.0	VHQKHPLVDISLNEQTLKLRFRRPSETPGTINAEPALRRACHLPMTGRHKEQAA
6	1544411..1545193	hypothetical; PP_01422	0.0	VSETQLETYMQTYAVSRLITYDAASGLVGLPETLQPTRRAVASRVNGKKGGRPPKNTNPSPQRDPRQRTAMMPISGGKKVSQETQGKTQASYTRDKLSLADNISLEDKAKLGVQVSDEQIDAAFKRIGPKAFEAAGFDPVRNLGNFHIVRQWSADALRAGLSVDEAERLILGVVESVSERQRSKGASISHLGYFGKAIGTAIGNRDVPEALMSEYEIEADRAWKRDMDAWRERVVSGAAGAVNAPIPNRAEYLDRAREAA
7	1545190..1545579	hypothetical protein Mmc1_2838 [Magnetococcus marinus MC-1]. gi|117926120|ref|YP_866737.1|; PP_01423	3e-05	MSKMPLRFDPDRSLPEQVGEWLDEAALTLAALPATGLRPAGAGSTWPDYVRDLEDLGWDRESDDFLPRPTADQVERPDIVLTWVPMIEDRRLRTVVNMRLIVHRISGRHKWEWRKIGDELGTSHVTAKA
8	1545844..1546068	hypothetical; PP_01424	0.0	MENSTTPKIQRPAELTVEAVNAAFRNGGLDAQLADQGDGNMVMTGRDINAANALLMGWMEEQNSVVTYYDHSDR
9	1546220..1546822	PHAGE_Rhodob_RcRhea_NC_028954: terminase small subunit; PP_01425; phage(gi971760163)	4e-10	MEASPGVALNKAEMAKRLKVSLPTLTNWLDRWPDFPFVDRGTNGKSWRFDPHAVFDFLAARQEEEQRKSAGRDEQLERLQLQFDELFEPEEQPRSLGTVSAKEQIDIWRLRELKRKEAERCGKLVVAEQLQDMFSSAFATLSRDTGMLLRRLAREQDWPEAVLRKAEADLADTQRKSVTAVLDTLKQEADTDHERQRHLA
10	1546797..1547510	PHAGE_Salmon_118970_sal1_NC_031930: RecT family recombinase; PP_01426; phage(gi100012)	8e-20	MSDSDTSPDDVLFADPRLILAEAIKAYLPPERINTADYASKHRILDNRGGGYVGRWNHDEAPFLVGPMEALDELRFLNVAVVGPARSGKTTIGQNWILKSVDVDPADFLVYAQTDDMIESYVKREIAPMIDLHPQVKEKLGLRPVDNSLKFERFLAMWIEFLAAAYNNLINKSAPRIIMTEIDAYPANLGDPCAFASIRRETLGQKSMLLAESHPDRANGHAAGGSITSLSSAFGDL
11	1549472..1549585	hypothetical; PP_01427	0.0	MRNILRGSFLGFGDLFPNSLFCNLSRFSFGSSLHEQF
12	complement(1549565..1552036)	PHAGE_Cronob_vB_CsaM_GAP32_NC_019401: long tail fiber proximal subunit; PP_01428; phage(gi414087138)	7e-24	VPVQVNGATVLAPKLYLAPGNVALTGGTIAAKDVSLAGASVNNSGTISGSNSLSILARNGDITNTGTLAGGSVSLVAQNGSIINSATLNDYLVNGGNQGQLGSVGTISASGAASLSASNDITFNGGRLSSGGDLSMLAGNSLTLEATKTQSEASASHHVAGISLSSQGAQGTLGYGMRDDKSSSSSTVWTPSVLASLGGNVALNAGKAITIDGSALSAANDLTLSGSSISLLAKENSLTQSMAHKEKSIGASIGLSPTSIMGQVVNTGLAASQTSGKGSGTLAALNAMQGAAIIATSIINGGEAVAGNIVGVRQSVGSSSLHQSSTETQTHAVGSTLNAGNTLSVVARGDNTADAQNGSLSATASSLSGKNVVLAASKDITLQAGWDTTHSESDMKSKS…
13	1552246..1552374	hypothetical; PP_01429	0.0	MTEYGNNAEEEKNHHHSTFPFHPKHTILKYFRQILFEVHLMA
14	complement(1552652..1552942)	PROPHAGE_Mesorh_MAFF303099: transposase; PP_01430; phage(gi13475314)	3e-13	MLKFYGAARRRLGLAIRHLSLQGLNNRAENSHLPLRKRERIMQKFRSPGGCQRFVSVFSAIRNLFVPSASITTAVSRHIHRIKAFAQWGSATAPSP
15	complement(1552988..1553185)	PROPHAGE_Mesorh_MAFF303099: transposase; PP_01431; phage(gi13475314)	7e-12	LGTAPARSLHRKATRPDDIWHLDEVRVMIRGKPHWLWRVVDQEGIILDEILQTRRNIKAARRLLT
16	complement(1554179..1556182)	PHAGE_Escher_121Q_NC_025447: long tail fiber proximal subunit; PP_01432; phage(gi712914769)	2e-11	VQASVGFSTSKTASQQSQTTLQGSSASAGGTLAMVARGDNAADAQNGSISVTAGQLSGKDVVLAASKDITLQSGVEKGETKGSSSSFGASVGVNAHIGAGSKDSTGINVTASVGGSKQHSQSDSTTHVATTVTGTNSVTMVTPGTTTLNGAVVSGGHIGMQTGNLVIKSPQDTAHYESHATSDGASISVPVAGVGQTGGGAIIAHSAITDEYRSTGKDQSGVYAGKGGLDVEVSGDTHLTGGVISSAAEAGRNHFSTGSLTAESLENISRWSGTSVSAGGGYSKGEAPSDVLKTGTFAVGHEDHSESSVTQSVITGNIDVQSGSTTGHYGTDLAGANGHLDNDFNARKLNTTLQIQTAGQTLAESAVEVGVQIAKKYSTAGNAKTSGSKGEDNKRSNDA…
17	1556138..1556389	hypothetical; PP_01433	0.0	LRGRLAGRETNTRLHTDDVVLPGTARRERADRAKLALIAVIDQIEGSRTSIKLYRFAVASMSYDRKTTLEWRFSTPPSMDAIK
18	complement(1556463..1556672)	hypothetical; PP_01434	0.0	MSEKTVQYYYKKIENELKKYDDKLYREFLEKKRKEMPRDIFIWLDGLCRLGNIPKSCEPFVTELFWLIH
19	1557004..1557177	transposase IS5 family protein [Gluconacetobacter diazotrophicus PA1 5]. gi|209544851|ref|YP_002277080.1|; PP_01435	2e-23	MSGIARKTKRYPSDMTDEEWARIAPLMPEPGRMGRPREIEFREVINAVRYLVRSGCG
20	1557181..1557801	PROPHAGE_Xantho_33913: IS1480 transposase; PP_01436; phage(gi21231089)	1e-21	MSPIHFGHWRTVYGWFRELARRFLFQTIHDVELMLDRERSGRETSPTAGVIDSQSIKAPHAQTRGYDAGKKVVGRKRHIAVDTDGRLLMVNLTPADISDSAGAQVILDAIRKRWPWVKRLFADGAYDRLQLMDKAAYLDFVVKVIRRRDGAKGFEILPRRWVVERTFGWLTRWRRLVRDYEHRIDVSQAMILVAMGANLTRRNAHP
21	complement(1558202..1573258)	PHAGE_Escher_121Q_NC_025447: long tail fiber proximal subunit; PP_01437; phage(gi712914769)	8e-43	MNDTRMKKNLRKLLAVFLSADMALFPAVASAQQAAPSIVIDNHTMPSAPAPSLDRTANGVQQLNIATPNGTGLSHNLFTEYGVEQKGLILNNATKATQTQLGGYVYGNANLNGTSAKVILNEVTGPHASQMLGTTEVAGQRANVVVANPNGITCNGCGFVNTSRVTLASGHSEIDTTGKLAALKVQDGYVAFEGQGGNFTAVPVLDILSRRVTFNAQVNAQNARLIVGQNRIDYETGQVHPLDKDGSPAPAFAIDSTALGGLYAGQISMLVNEAGAGVRVNGTMAANAGDMTLTADGQLVLNGKMSASGRIEMAAGEMQQAGSIQSGASTQLTSTGAITQSGQIEAGQAIALSAGSLHNTGSVKSAGNGGIRIATHNETRNSGTIAASGGGLSASGQSL…
22	1584181..1584194	attR ACCCAGCGCGAGGA	0.0	ACCCAGCGCGAGGA
Region 3, total : 22 CDS.
#	CDS_POSITION	BLAST_HIT	E-VALUE	SEQUENCE
1	1693290..1693303	attL CTGGCGGGTCAGTA	0.0	CTGGCGGGTCAGTA
2	complement(1693557..1694711)	PHAGE_Burkho_phiE202_NC_009234: gp10, site-specific recombinase, phage integrase family; PP_01550; phage(gi134288747)	1e-24	MSLKIVARKGRQDLYIRGTVRGQSLYESTGTTDPKQAEAYRAKREAELWAESVYGKRAVVTFAAAVTAYLEAEQRSETTLNHVERLLRHFGKRKLTSIGQGDADEACKTILRDGANASPATKTRGVLTPLRAILEFAAVRGWCDKPAFQMPRVPQTKMLFIRPDEAVDLVNEAAPHVRPLLVFLIGTGARMSEALDLEWSDVDLPAARAVVWQKQGTERHIDLPPVVVLALAGLPHRSGRVFRPVRSSRGAQGLVMGDAYYDTGRNGGGQIKNAWAYACKRAGLPGRERVWTPKGETKERRVFVPSLTPHCLRHTWATWHYCVHKDLLKLKEDGGWQTITMVTRYAKKMPDHHREAVIRWLGTTDWPDIVYSCQIGATMLDGGK
3	complement(1694901..1695158)	hypothetical; PP_01551	0.0	MTDPTPFNRLLGERVRRMIVAQGRSQESVAVEAGISTSTLGFLIKGQNSTINTVLSVMAALKAPPEVMAAIYADFVEHRKERADG
4	complement(1695341..1696111)	protein TolA [Methylomonas methanica MC09]. gi|333983205|ref|YP_004512415.1|; PP_01552	1e-06	MSHSLANAWADRELSEAEARGAAEQRRKSEIEDEAENARFADADEESTLNALMRRHGINREEASEELNWWQERDKRFPLNKAEQRRKDTEASANDTKEFVEAMDELLKAASDLLEDAYRETALPATEAEHLQEMRFLEQEHFGKAFAAIEKAKKRLTAPDEQKREMIAAKLTRPANVAALEARVKELEGVLKEAARALEQVTDGERGGYNARNGKFVCLRMSDGERADIIHSEVTEDCERALVTVRAAIREGGEHG
5	complement(1696505..1697317)	PHAGE_Escher_TL_2011b_NC_019445: enterohemolysin 1; PP_01553; phage(gi418487630)	2e-30	MNEVATVGAPGSFVIEGMQGAMKLAQAMASARMVPQHLQSSPGDCLMVIEQAMRWQMSPFAVAQATAVVKGKMCFEGKLVAAAIQTSGVLEGRLNYEFTGEGDNRAVICAGLIRGEKKARSVEVKLSEARTENQWWKKTPDQMLTYHAARVWARRHTPEVMLGVYAPEEMADAQDDRREPVDLTPEPKRTPPTIDHAARISGWLERATRPEQAVAVRGKWIEIVAKSDEAGNPIAEDVQNAVAGMIEARLDELAEAHAVQEADELEHAPA
6	complement(1697314..1697763)	hypothetical; PP_01554	0.0	VNTLDIANAAYAEHVKPSFDRMIDALKQMRSANDPDTGAVLCIEALDALAKDCAAMRDELREGVRQSCDESGTVSFEAGPYLVTRTRPDPAATVTDEAALRAAMPALFSPQPDKLDRATLTKRLRRGETIPGATLGAAPVGTIQIRTRK
7	complement(1697760..1697924)	hypothetical; PP_01555	0.0	LEELYADARELLVSATSCAGRQDLNADDLEERGFAPDSFAKARAVLAKAKGEGA
8	complement(1698092..1698268)	hypothetical; PP_01556	0.0	MTPAQHDLAKANAVLKHLRNEAWGLDATPLRKSLIQQWEAQRTEADRRMISELWETRS
9	complement(1698456..1698734)	hypothetical; PP_01557	0.0	MAYPDGMQFRSSDTRSPYYRASAMSNFQAAVSQDAEIAEEIRELITRTEQQVNAKLSRVNDRGAFDTDELDCLFCRLGEALPNRAVLEQRAG
10	complement(1698815..1699003)	hypothetical; PP_01558	0.0	MSIYKAKAFHDAFFDASREERESVSVDRAKHTCSYLKDLVSEDERIASFTVAEIIENLNRYL
11	complement(1699245..1699970)	PHAGE_Liberi_SC1_NC_019549: putative Bro-N family phage antirepressor; PP_01559; phage(gi423262499)	1e-31	MATEPTIFVFANAEIRVVMLDDAPHFVGKDVAERLGYSNAADAISKHCKGVAKRYPLSTEGGMQEVRVLSEPDVLRLIVRSKLPEAQQFEQWVFEEVLPSIRKCGGYMVAAPDETPEELAARALIVMQATIERQKAQLAAAQPTLESHERLVNAKGRTNLREVGKELKIGSQKGIELMRQVGWIFKDARGKWKAYASAVDAGYVEMKYATFTNTAGEEVATQTVYVTPRGVTRLDARLAQH
12	1699955..1700089	hypothetical; PP_01560	0.0	LARLPSGFPIGVDGVNVRCFRTSVKRFFRTCRTKRNPAGPGLHD
13	complement(1700567..1700893)	PHAGE_Escher_HK639_NC_016158: hypothetical protein; PP_01561; phage(gi356870648)	3e-06	MSFKKIIPRRRKIYLELLSDIDLQLKKAYSEENTKSGLSKADLARKLEKDKSFVTRIFNGTRNITVETIADMAYALNRKINFELTEENHRAGKNEQIKPSVIMMGVGK
14	complement(1701439..1702188)	PHAGE_Brucel_BiPBO1_NC_031264: nuclease; PP_01562; phage(gi100068)	6e-10	MTDELPRLKLKALRNRAGWTVRAFADAMGYGEKQSSYRTYEDTYKKPFLPIDFVEKAVPLLVDRGEPPIELREVWELAGVFPGEMGIREGIERAKRVEAATHPVQGAVVVNEYDISPQAGSGALIDESAGGGEGHAPVASWAMPRGFLENYLPDTSGLAVVRVIGNSMEPDFLPSERVLVDTRHRQLSHDGVYVLWNGHGVVIKQLQLIPNSVPERVRIISVNPSYPIDEVALTDIHINGRVVGKWLWK
15	1702273..1702494	hypothetical; PP_01563	0.0	MTIATDIITRLGGTRAAAKLLDKPPSTVQSWKGSGFIPARYQGEILEKARHAGIEINAADLVGARRTPTEARP
16	1702915..1703220	hypothetical; PP_01564	0.0	VRDCGGIDALAAHFAISKHAIRYWNRVPTRRQYEIRDLSGIPLAVIERVKKSEVVAEHPQSKPKITRIDPLPAGSAETWGAMMPGVSWADAQRDIAQMGAR
17	complement(1703243..1703458)	hypothetical; PP_01565	0.0	MDDDTTTHEHDKPLVEADARRFTQRLDTPVIALDIMRAARLWSVLHPHATGQTRQRLVEQFAAAVGVVVV
18	1703564..1703887	hypothetical protein Gdia_2478 [Gluconacetobacter diazotrophicus PA1 5]. gi|209544609|ref|YP_002276838.1|; PP_01566	3e-32	MMDAATYADTVSEILRRNYGHLRHAAKQLARSVGTSPRTVENWFAGINAPRGAELIRLMQQCDDLRDEIFRIVEEGQCPKASASTSDGVDLATIPGPQEHSGWVFYR
19	1703967..1704185	hypothetical; PP_01567	0.0	MTQPLPFANLRNYLADQIEMEGSLSRWADRHGFHKSTVSEVLSQKREMPDTMANALGFAVQKIAIPMRGQNV
20	1704226..1704450	PHAGE_Agroba_7_7_1_NC_019519: hypothetical protein; PP_01568; phage(gi435844355)	1e-12	VAADRLRSIIERHIRLEEEVKALRGDQKDIMSEAKSAGYCPKTIKQVIRIMNADPKDVQEAEHLLDTYRRALGC
21	complement(1704447..1704686)	hypothetical; PP_01569	0.0	MSKPPSPVPLPFQGADLGFKQVDLAVFGRQQRQRPTSLSFGFPQLMILASVDDLSCSEQRNEPVVFGFQSAASAEEEET
22	1704685..1705041	PHAGE_Achrom_phiAxp_2_NC_029106: hypothetical protein; PP_01570; phage(gi985770107)	3e-05	MKRPEDTLHEAVWLALKLALPPEAVAISHENRQNGPREGARRKKRGCLPGWPDLEIVHAGRHHLIELKTPVGTLSKAQREMHARLTQAGGSVAVCRSVDAVLAHLAACGVPVRARVAA
23	1704947..1704960	attR CTGGCGGGTCAGTA	0.0	CTGGCGGGTCAGTA
24	1705038..1705925	PHAGE_Pseudo_phi297_NC_016762: putative DNA replication protein O; PP_01571; phage(gi374531278)	7e-36	MSKPEPLTPSDCDLRGLPFMQLDVSRLVDSDMFALSTGEEFKAAVALWCKSWLQIPASSLPNDDRVLAHLSGAGSRWSRIKEMALRGWVLCSDGRLYHPTVAEKARHAWESRVRQRERAAKRWEKSDRATGNATASDSQEPRECHGISHGNAIERERERESIDSSLRSESVSASAPDEKPSVRVVGYSEPKAPKGCRLPDTWWPSDDLQQFARSNGCNPNKVAEAFCDYWRAVAGAKGVKLDWDATFRNWCRRDSERGGKAASVPRERPKSILAQQADRMEAEWLERQGMGEMQR
Asaia bogorensis W12
Genome; Raw sequence .3315162, GC%: 60.98%, length = 3315162 bps
Total : 7 prophage regions have been identified, of which 1 regions are intact, 5 regions are incomplete, 1 regions are questionable.
REGION	REGION_LENGTH	COMPLETENESS	SCORE	#CDS	REGION_POSITION	POSSIBLE PHAGE	GC_PERCENTAGE	DETAIL
1	19.8Kb	incomplete	50	29	695590-715422	PHAGE_Aeromo_vB_AsaM_56_NC_019527, ......	60.43%	Detail
2	13.1Kb	incomplete	30	11	722791-735901	PHAGE_Caulob_karma_NC_019410, ......	61.34%	Detail
3	19.7Kb	incomplete	60	8	1756200-1775995	PHAGE_Mannhe_vB_MhS_535AP2_NC_028853, ......	60.26%	Detail
4	30.6Kb	intact	150	45	1782874-1813524	PHAGE_Gordon_Ghobes_NC_031028, ......	61.45%	Detail
5	10.7Kb	incomplete	40	12	2051277-2062038	PHAGE_Caulob_karma_NC_019410, ......	57.88%	Detail
6	23.4Kb	questionable	70	35	2439649-2463093	PHAGE_Mesorh_phagevB_MloP_Lo5R7ANS_NC_025431, ......	59.04%	Detail
7	9Kb	incomplete	30	7	2461031-2470098	PHAGE_Cronob_vB_CsaP_GAP52_NC_019402, ......	60.61%	Detail
Region 1, total : 29 CDS.
#	CDS_POSITION	BLAST_HIT	E-VALUE	SEQUENCE
1	695590..695760	PHAGE_Burkho_Bcep43_NC_005342: gp32; PP_00761; phage(gi41057684)	1e-05	MTLFGDSGRCYVIDGQNMTMTYRFDFVPTPVQLSIIYRSGVLPQPSGVNVSYSFEE
2	695761..697338	PHAGE_Edward_GF_2_NC_026611: hypothetical protein; PP_00762; phage(gi764162276)	5e-60	MSSSSGTTSIPALTITSAGVVAPDELDVLTGALTDISAAMGGNVNQDLSTPQGQIATSEAAAIGNCYDAILAVANGVDPKVASGRMQDAIGNIYFMTRVPATATTVAVSIVGTAGQVVASGSVIATDGVYQYALTADVTIPAGGTASATVANTETGALACSANSLSLYQYTAGVSSVSNASPGVLGSDAEGRIAFEERRNNSVSANSTSQTASILGQVLKLSSVTDAYAYSNGTTAAVTYNGVSVPANSVYCCVAGGAPADIGLAIMQKKSPGCGTTGGTSVQVQDPAAVYNGNGPTYTINYAVAQATPVYLAVTIKNGVDVPSDALTQIQNAVLAQFASGGSSGLRPTIASTIYASQFGCAIMSLGTWARLVTLQIGTAPPRQSEPGHDDNGAGADHG…
3	697339..697692	PHAGE_Acinet_LZ35_NC_031117: hypothetical protein; PP_00763; phage(gi100026)	7e-12	MQSLLLDRTEWDLVLDRSGNIAICSEPYSVLQDVSNAIRVFQGECYYDTSKGLPYQAQILGKSQSVPIFQRLAEAAARTVPLVQDASCVVSRLGGDRSLSGIMQITLTTGETLDVQF
4	697693..698331	PHAGE_Acinet_LZ35_NC_031117: siderophore-interacting protein; PP_00764; phage(gi100025)	2e-20	MVDHVSPQSTFAGLTNGSAIDAAVDRAISAMGTPILVQVKAVHGGGASLVGQVDVQPMVHMQDGQGKTYPHGVITGVPYLRVQGGTSALIIDPMVGDIGYVMVSGRDIQNVITSRQPSAPGSFRMHSMSDCVYVGGFLNGAPNQFIIMNGNGIRIVSPGTVRIEANAAEIACGLKVDGPITATGDVTGNGISLDNHTHTGVQTGSGSTGKPQ
5	698332..699366	PHAGE_Acinet_LZ35_NC_031117: XRE family transcriptional regulator; PP_00765; phage(gi100024)	1e-17	MSGSLSSYASYGGSLPRSFTKKKIDITFTVRSGGQAAGGVVDQEKLTGYRCQVDVTNAGLRMGSAANVRIYNLPLPLMNRMSLMPSRIPGVLSDLTRTTLNSIMIEAGDDEAGMTTIFNGIISSAFADFSTAPEPAFNIVSYDVVGPNMNVIDPHSFPAGASLAGMISQIASDAGYSFVNYGVSAKAKGPTYLHGSMTDQIEALKKTYKFIYAIPMLGTTGQASPYQVTIWSNNLKDLQGKTIPKVSAKTGMIGYPAYSNYGVSLVTLFDHRLQFMNTFAIDSAYLPAAWVNNQAGQVAPMPVNGTWVAQMVTHELDSEIPNGRWFTRVEAMRTDYAGNISYNG
6	699367..699660	PHAGE_Burkho_Bcep43_NC_005342: gp49; PP_00766; phage(gi41057702)	1e-14	MTGIIPLTATPYQTLNIVLDGQNIRLDVQQRRTGVYLNVWLNDVQVVAGALALTDTYIVRAAYLGLPGDFAFIDLQGSDDPDYSGFGTRWFLFYSGA
7	699661..700395	PHAGE_Aeromo_vB_AsaM_56_NC_019527: hypothetical protein; PP_00767; phage(gi422937557)	1e-09	MAFPVIPLPSVWDVPVMAGVPALLGQSIGNGVSASVSNLLGQEVANWQITSAAAQWGVFLNGTQILTSAHVLGIEHEVAYQVPSGPTENGGFVSYNKVKMPYVSRILLVCDGSESGTTISAGLTQVLGAITGSGPAFVRKSFFDTLEQIVADTNLYEIHIPERSYMSANIVGYRFRRTEREGITMPVAEIMLQEIRSGATQGYKNTSAQSVSAAVPVQSGQVQLQSLPSGAPDLAGIMDRISGL
8	700396..702501	PHAGE_Synech_S_WAM1_NC_031944: RecT family recombinase; PP_00768; phage(gi100012)	2e-25	MSIIDRLVIQLGMDTKGFSGEARKSVEQLREVEKQAQATGSGMERDGVKAASFFSGVRREALAMFAVFTAGKSLKAFIGDTTKANAQLDYMSQRLNMDPAGLNRLETAAKAAGGSFGEVTQAFGTLQQRMTDPQELAKVSQAFARLGVSDFMDKSGNIQGDIVARLNRSVHQNHINNQVALGYMRDLNFGEGMINQVLMDPKKFADLQNQLKNMPAPSKAATEASRQLYQDWGILTKQSENLTNILTAKLAPGLDQVVRRLLELERDHPDIAGAIGGITLAVGELSKAFGGLGGILAGMAGLNIIKRLFGGDTKAMRAAIAELKAAREAAALPEAVAAGGIGGRGVLSRLGPWGLAVAAGAAVMAPGKTNEGEADVLAQMRAEGRTGTHSRGVASKSPL…
9	702649..702885	hypothetical; PP_00769	0.0	LTSASGEEFARTWGKVITSLPNWAAGLESDLREVYLARQGVPTKRKALSENAVKALTALYQEYGGVSAQADRKSPALA
10	702886..703749	PHAGE_Shigel_Ss_VASD_NC_028685: hypothetical protein; PP_00770; phage(gi966200469)	3e-17	MTNALTTIDFHGAKLVAIAGDRPENTLVAMKPIVESMGLDWSFQRKKLNAHPVLSKGVAVTAIPSDGGEQDGTCLSLDLLNFWLATIHPDRLKDEVRTTVIRYQSECARVLFNHFFGKVIAAGDHLTHSEHGGITKAVITRALSPVTTRMDAQEARLAALVERLETAITAYDPSAGFTTDYRPMRFFVENAGVLQKGRGDLIRKMSRRCVNWLLRNDMGGSIRWNRDKERKLFHVDVVPRWMQFEGAEMIRAHMDKMTGQGTLAPKGKKGRTELSPRPFSRPKEAVS
11	703792..704019	hypothetical; PP_00771	0.0	LADADWLASLSHEALTKEAIRRNQVIAEIVVACEMRAEGRYAAADFDKEIAEILEGDGWFSSAVLLERFRKGDVA
12	704032..704166	hypothetical; PP_00772	0.0	VPRCLLFRKFEPDFDQASNCFIPATTTGRDPVCVNPFANRRPDA
13	704167..704328	hypothetical; PP_00773	0.0	LELIITYFDLLDEDMTTQDISSESAKVTVFFELRPDLLHQIVDGIARLKSLAK
14	704329..704748	hypothetical; PP_00774	0.0	MRDEAAKQQMAADAQAQAQQKQARVDRYGAVVLAACKGKVTQANMIVTSENPYATQGLCIEATIRSIWGQIQWLNQHSLLLTDGLPNGQEPMSTIITDPNGALRLNAQAVLMGVKPITYTSVLGAQTVAPTFVVVKYLN
15	704749..704880	hypothetical; PP_00775	0.0	VSRPIAYVVGSGLATLHELSTIYDTEDMLDLMEIGMVRDYNGG
16	704881..705348	PHAGE_Acinet_LZ35_NC_031117: general stress protein; PP_00776; phage(gi100019)	8e-10	MALRETTYTIPDGEDAGKVFVITRMPAMQADRWARHLVKALTRAGMALPPDAMEIGLSGLGGMAQAMFGQLEDEAADKALDALMATVKIQRDPNNPASRGQIIDADLEDPETLPRLQAEAFRMHLGFFKAAAYLISPLVQMLVPQAASDKPQPAA
17	705382..705780	PHAGE_Aeromo_vB_AsaM_56_NC_019527: hypothetical protein; PP_00777; phage(gi422937550)	3e-19	MLTVQTLFNAPVRLENWSADRAWEAAAIEQVETRMSIDGKLNAGWVPNPVDMTLGIQPNSDSAIMFEGLSTAMAGARTPYILGGEITLPGLGRKYTLVTGYLVSASPMPSAGRLLEERQFTIRWERVYPVGI
18	705781..706935	PHAGE_Burkho_Bcep43_NC_005342: gp04; PP_00778; phage(gi41057654)	3e-49	VAVGTPISLVVSVVPGTIPANGTLDFLNGLILTTNVTAVPDGTVKAFTTLADVGVAFGTSANEYKMAAAYFTGYDNAFQLPATLYFAGFVDGTDTPATFMDKMAAASLQWTGFSTAFEPSLTEKQGFATWTGAQNAKYWYVPWDTDATATTQGSTASFGAWLVAQDLTGTSPVYMDPAAAGAFLGWMAALNFDQVNGRQNLAFTSNGQVTPATYSAATAATLLANGYNWYGQFSGRAGSFNWVYNGSVSGPFLWADSYINQIWINALLQYADASTLTNFGNVPFNTQGDAIISAGRKSVISQALSYGAIQTGVAISDSQKLAINRFFGVDGAADSVVNQGYYEQPGASTATSSSRAARAIPASKFAYADGQSVQMITLLSREVI
19	706936..707358	PHAGE_Burkho_Bcep43_NC_005342: gp05; PP_00779; phage(gi41057655)	1e-10	VAAPPGPFIVFTPLFRRRIATNASSYTSTTREVVEPMECTVQISAFGSVSGEAVQRVVALWRDIYAADWLRNATGGVMAPLYASEPRQTGFINSDKQYEDNWTADLKFQVNFTVSTPQQFAESITVDLREVDASFPSPKE
20	707359..707739	PHAGE_Acinet_LZ35_NC_031117: hypothetical protein; PP_00780; phage(gi100015)	3e-06	VFGLASGALGIVNPATTVTVKCSDGQTIEPDGSVTRKTFALTVEADIQAVSAGDLELVASINQQADMRAVYIRGGLKGLSRPLQVGGDVLNFYGSDWLVTQPVEEWGFGEWSKVIVTRQTAAPCPM
21	707740..708267	PHAGE_Acinet_LZ35_NC_031117: RecT family recombinase; PP_00781; phage(gi100012)	2e-12	MAKQVFRGGDKLRKALDELAKKVARGGTVEAGVFEDAEYPDKTKVAQVAQWNEFGTKSAPPRPFMRQTINDNQDKWGGDLAKALQATDYDAEKALGIVGERIASQIRDTIREGDFAPNSDLTNLLKDRYPKGDYGTAEFLKAVADLKNGARGADGKPLDWSGQLLNSIRSQVSDD
22	708268..708711	PHAGE_Edward_GF_2_NC_026611: hypothetical protein; PP_00782; phage(gi764162257)	3e-20	MTDTTPQPGVVTFDYAAWSAAYPELASSVTEAAAQARFDMATAILDNSAYSAEPDVTKRTRLLYLLTAHIAFLFLPQSQGGRGSDSVGRLASATRGSVSVSFDAGSTAANQSWFAQTQYGLMFWQATTYLRQMRFIPGRSARARIWP
23	708712..709137	PHAGE_Acinet_LZ35_NC_031117: hypothetical protein; PP_00783; phage(gi100009)	2e-07	MADTVTVLCRLPHGLELRIAPEGDVERRAKLSADDKPDRSPVGYVQSVTVNGANRAPDYHPKDNVLLGRVGRTQVEKSFWDKWLAQHKDSDLVKNHCVFAEVTERAADAKAREFATEKTGFEGVSPEDLKRKGMEAETAT
24	709138..710181	PHAGE_Burkho_BcepNY3_NC_009604: major capsid protein; PP_00784; phage(gi149882911)	5e-57	MASFRAEAPRLAMDWGINLRGVTHYTDEKGVALDAAPVFGAVTAPNSGIPAILNTTVDPQLIRQLITPAKSEEIYGSEKKGDRTNKTVMFPVIESSGYAVAYGDYEQGGDSSANANWVSRQSFHFQTWAKYGDLESEMMGTASIPWVAEQRTAGVSVLAKQQNLINLFGVSGLENYGALNDPALPAAITASVKTGTATAWTSTSDPNAVYQDFVNLFAALNKALMGNIDNQTRLKVVVPSELSQVMNYANTYGVTLAALIKQSWPNMEIVFLPEAGVTMSGGYTSANVMQMFAPEIDGVETVSTAFTEKLTMHRIEQYSTNARQKMSRGGWGTIWKRPMAVAQMVGI
25	710182..710694	PHAGE_Acinet_LZ35_NC_031117: kilA anti-repressor protein; PP_00785; phage(gi100007)	7e-19	MGFPNKINYNWAVGFPGGIASANPRRSAIPGSLGFRAGSAGVAVGAFGWVQADGVTVLNKPVGSEAPTGFVLRDQQALITAYLAESTMLLPSGFNVQLMSGGDYFAVASTAATAGQAVYASTTDGSLQTGAAGTVPTGTVATGFVVTQGGAAGATIIISGAVAPISGSNE
26	710710..711858	PHAGE_Acinet_LZ35_NC_031117: XRE family transcriptional regulator; PP_00786; phage(gi100006)	6e-43	MAFDRSVRRIDDDGHLHVERCILSAAVVSPYWGSEIKDAERLGLKPDVLYQVYRDADALRDAAASMNGKPLIEIHQPISADAHPREITVGAVNNVSFDAPDLIGELSIWDGDAIARIQDGSKRSVSAGYAYDIVPESGSINGQEYSLKMVNIRFNHLALVEKPRVDTAIIGDSASPTLERKSMAGHKPMSPAAKVSAALKAGRLALDASEEDVKKCMDEEEDDRKEAEDEEEEDKDRKAEDSDDTDDDDDDAMDEEENDKDDRKAADAAPRMISLADARRMARDEAARAVAKQEQKTAALRVALDAVRPVVGDVHGMDSAASVYRYALADQGVAFDGVSDAAGLAAIWRVVTQRQAAPRRMAADSAVATDSPIAGKSARIKA
27	711859..712602	Phage protein [Achromobacter xylosoxidans NH44784-1996]. gi|528981826|ref|YP_008027143.1|; PP_00787	4e-61	VEAAYRKALTDLVEEMAASVDYWVRANYRKIEPQVAQDASPASVLQGIMNKLTARWRTRFNEVADELACRFVKQAQGHADRQLSLDLQRNGFAIKFKPSQAMKQTAALSAAENVTLIKSIPEQYLSQVEGAVMRSALAGGDLGTLTADLKQRYGITHRRAAFIARDQNRKVGEAMTRTRQMGLGITEAIWQHSHGGKHPRESHVKAGRDKLRYRLDKGAYIDGQWIFPGSEPNCRCVSKPIIPGFDD
28	712603..714195	hypothetical protein APA12_05210 [Acetobacter pasteurianus IFO 3283-12]. gi|384041539|ref|YP_005480283.1|; PP_00788	2e-85	MAAWFTRKAAAPAARVEPRPAERKEPRISFARFAQDADLAELARIEAATQSFQPYQPPAGVRGAALAMDDAMSLPAGFGAWAGENIGIIEGYIADGLSFQGYPYLAQMMQRAEFRKPVDVLAKECTREWIRFRSKKQTAQPGEDKTAAKRISEIETAFKSFNIREVIREQIRHGLGYGVGHVWADVGDLGYGALDQEKPLRVNKTGMAQGALRRFANVEPIWTTPANYNADTPLRDDFYKPSVWWVQGSRVHSSRMKSMVPFPVSQMLAPAFNFGGLSLTQQLKSYVHNFLRLRNSVSSIAANFSKLVLLTDMFGNMATPQHADYGDINPSSLTGRANLLQSISDGQDTIVADKEKEDAKILATPLGGLNELLAQAMEATASIPGIPLVKLFGIQPTGL…
29	714196..715422	PHAGE_Bdello_phi1422_NC_019525: putative TerL large-subunit terminase; PP_00789; phage(gi422936857)	1e-101	MSQTRIEIPPAFGDFGRGYRYRVWYGGRGSSKSWTVARVLVALAATRPIRVLCVREFQNSINDSVKRLLADQIEALGLTPWFKVQETSISSKAGAEFLFKGLARNIQGIKSTEGVDICWVEEGQTVSQSSLDILIPTIRKAGSELWFTYNPEHDDDPMHRLMLMLQDEDGALVRKVGWQDNPWFPPELNAERQLLLRHDPEAYEHVWEGECRTISEAVVFRHRVSFEEFETPDDARFYFGADWGFSQDPTALIRAFIDDDVLYIDQEAFGLGVEMDELPALFDRVPGSRDWPILADCARPETISYMANRHRFRIMPAEKWKGSVEDGIERIKAFRKIVVHPRCEQIAKEFRMYSYKVDPRDARLILPKLEDKWNHGIDALRYALSPLIQNRRKAPDFSA…
Region 2, total : 11 CDS.
#	CDS_POSITION	BLAST_HIT	E-VALUE	SEQUENCE
1	722791..723726	PHAGE_Burkho_DC1_NC_018452: nuclease; PP_00812; phage(gi401723085)	9e-31	VSEVLTITGEEWHALRARHVGGSEIAALFDAQPDYALGLHGLWLVKSGRAPAPEVDNPRTRWGTRLEEAIAYGCAEQEGWKIRKGGHFTDLSCRGLGATLDFVIEGGEEGRSTPGALEIKNVDYRVHKQSWVDGEPPLHILLQLQHQLACSGFTWGAVGELIGGNDLRIYRYEARPKLIAKIRQKVAAFWKSIDEGNEPPVDNSTQTGAILRAMNSPVRDEIADMEGDNELPEICSGLLHAAAKRKEIEREEQGFKNRLIEKLGTAKKARSQGFFISTIVTPEKAPRAALPGEMIPGRKEARRYEIKEANA
2	723262..723277	attL GTCGGCGAATTGATCG	0.0	GTCGGCGAATTGATCG
3	723727..724512	PHAGE_Mycoba_Charlie_NC_023729: gp48; PP_00813; phage(gi593779211)	1e-38	MSNALATPTEKLRTQITSMTGEFRNALPSHIKPEKFQRVVMTVVQQNQGLMNADRKSLLASCLKCAADGLIPDGREAALVMFGQQVQYMPMLAGIQKRIRNSGEIASIQAHVIYENDHFVWHQGVDASIEHRPLFPGDRGKAIGAYAVAKFKDGSDPQFEVMDVAAIEKVRAVSRAGKSGPWVQWWDEMARKTVFRRLSKWLPMDTEAEDLMRRDDENDAQDVAAPTIRVEAEAPSKLDALERDDDGVVLEETRELEGSAA
4	724513..725103	PHAGE_Vibrio_VvAW1_NC_020488: exonuclease; PP_00814; phage(gi460042915)	1e-29	VSILFFDTETTGLPNYGLPTNHEDQPHVVQLAAILTDERGEEQAQLSVIIKPDGWVIPDGAARVHGITTEKASRYGIREVVAAGAMYDLCCAADTIVAHNIKFDRQIVGTMFARAGRGWKLPERQACTMMNASPIVNLPPTERMIAAGYGDKPKAPSLAECIRHFYGEELDGAHDALVDVRACKRIYFEMLEQVPA
5	725110..725289	hypothetical; PP_00815	0.0	LSLRRYPGANCILCRLLFRQAIRYFPVAYLCDIQRFEQATLYLAKGCGGHAGTCSSISK
6	725299..725556	hypothetical; PP_00816	0.0	LEGEVERLKKPEFYSVEDQETGWCDLESLMESLDGDVPYFEPVEIDCFRSVPKIWAFYDGNTVHEFATEDEARTASAAAIREGGE
7	725557..725727	hypothetical; PP_00817	0.0	VAVEARISTSTLGFLIKGQNSTINTVLSVMAALKAPPEVMAAIYADFVEHRKERVE
8	725734..726903	PHAGE_Pseudo_PMG1_NC_016765: integrase; PP_00818; phage(gi374531680)	1e-31	VLNGEDLPDDQFRRSARNPHQNHDPHSPGRNSRDRKPDRMSEAGKPRLCRVSGRDTWHIYHQRKRISTGCTDRASAELVLARYAAELSRPTTRAVSVTEILSLYLQDRREALKPGAERLGWAHKPVSAWFGEKPPEAVTDRECRAYAQKRMESGIAASTARTEMQALRAALRWAAAQKIIAECPNVPLPSRSPPKERWLTRDEAHALIDGCEAFHIRLFVILALGTGARVSALLELPWSRVDMDRRIIDLRDPGKARTAKGRARVPINDGLLATLQEAHAIRETDWVIEWAGDRVASVKRGFRAATIRAGLEGVTPHTLRHTAATWMAQAGVPLWEIAGFLGHSNTAMVEETYAHHSPGHLKGASRVLDMTLLQQFPVERVNTSIRKRQ
9	726904..727623	hypothetical protein PSEBR_a2016 [Pseudomonas brassicacearum subsp. brassicacearum NFM421]. gi|330808801|ref|YP_004353263.1|; PP_00819	2e-48	MNRPHILCHMMSSIDGRIDTDRWTLPADGQARDTLVNQYFALEESFDADGWIIGRTTASAHFLKTDDPMPQGARLLPRMSHIAAAFEKKLAILIDPSGKLRHERADLDGDPVVAILGESVADAYLEHLRGVGVSYCFAGEDGHDLPAAMRALHRDFGRRRLLLEGGGRINGAFLEAGLVDAISLLIYPGLDGQAGIASVFDYSGSATTQPAQGVSLRLDHVETRNDGVVWLRYSVNSPP
10	727624..727773	hypothetical; PP_00820	0.0	VGAFYKALCLRFMKLLFQRGDAVPCPAFRPSAALALAKTAKALYRWNEV
11	727774..728760	PHAGE_Lactob_jlb1_NC_024206: putative minor tail protein; PP_00821; phage(gi971848929)	1e-06	VSHRVYLLAALIGLGILCCASLMIGRYPVSFSALFQFCLGQGNASTHLVLTQARMPRIIGAIVIGAALSVSGGAFQAVFRNPLVSPDLLGVLSGAAFGAAGAILLHATGPFIGLASFCGGCCAVACGFAIARLVGQAGVLPLLLGGLISSALFTALLSLLKYVADPYEQLPAIIYWLLGSLARTSWAELAVVVPMLCLGMALLWMGARVLDTLSLSDDEARSLGLPVGVLRMVVLVLATSLGALTVSMAGIIGWVGLIIPHMARIMVGPSHRILLPLAALLGASCLLLADTASRSLSASEIPLGMMTELFGALGFILVLRQLRREGRL
12	728761..729528	PHAGE_Plankt_PaV_LD_NC_016564: ABC transporter; PP_00822; phage(gi371496158)	2e-15	MPHLRLEKLSFTRQGRVILRDLSLSFAEGQLVCLMGANGAGKTTLLRLILGLLRASDGGITLDGRAVHDFGRRDLARILAYVPQNRETPPPYSVGQIVAMGRLPYTGLMRESRPDDQGIVTRILMQLGLDALRDRPCTSLSGGEYQRVLLARALVQETPILVLDEPLSGLDFGHQIRLMVLLGALGKAGRLILMTAHQPDLVYRYATHVVLLEQGRVLAQGTPDTILEARRLSTFYDVSLTHHDIGEARFFAGES
13	735901..735916	attR GTCGGCGAATTGATCG	0.0	GTCGGCGAATTGATCG
Region 3, total : 8 CDS.
#	CDS_POSITION	BLAST_HIT	E-VALUE	SEQUENCE
1	1756200..1756215	attL GACAAACCCGACCTTG	0.0	GACAAACCCGACCTTG
2	1768495..1768824	PHAGE_Mannhe_vB_MhS_535AP2_NC_028853: plasmid maintenance system killer HigA; PP_01898; phage(gi971749638)	1e-07	MALKMHCSLAVHVGDWIKTELLEPQNIRVNTVAEHLGVSRQAISALLNGRCGLTAEMAIRFEKAFGVRAETLMRMQSTFDLAQARAHASDLHVQHFSLQDKADTVERRV
3	1768825..1769115	PHAGE_Mannhe_vB_MhS_535AP2_NC_028853: plasmid maintenance system killer HigB; PP_01899; phage(gi971749637)	2e-12	MEIESISYKGLRRFFETGNAKGLVRDASRLRKMLAFIDAAESLDELTVPPNYSLHPLVGERAGTWSMTVTKNWRLTFRLNEQGQLCDMALEDYHGA
4	1769116..1769256	PROPHAGE_Mesorh_MAFF303099: transposase; PP_01900; phage(gi13475314)	3e-11	MITDKLKSYAAARRKLGLSIRHLSHKGLNNRAENSHRTLQKRERVM
5	1769257..1769508	PROPHAGE_Mesorh_MAFF303099: transposase; PP_01901; phage(gi13475314)	1e-17	MLLERGIVVSYETIRRWSLKFGAVYARSLRRRKARPGDLWHLDEVRIVIRGKPHWLWRAVDQDGYVLDEILRPAGTPKQPGAC
6	1769509..1769811	PROPHAGE_Mesorh_MAFF303099: transposase; PP_01902; phage(gi13475314)	2e-19	MITDKLKSYGAARRKLGLSIRHLSHKGQNNRAENSHLPLRKRERIMQKFRSPGGCQRFVSVFSAIRNLFVPSARITTALSRHIHRVRALAQWNNATTLSA
7	1769899..1770042	PROPHAGE_Mesorh_MAFF303099: transposase; PP_01903; phage(gi13475316)	2e-12	VEEMFLEQGIVVSYETIHRWSLKFGTAYARSLRRKAARPDDVWHLDG
8	1770049..1770918	PHAGE_Escher_121Q_NC_025447: long tail fiber proximal subunit; PP_01904; phage(gi712914769)	2e-07	VAGQTSLTAGVIDSQAEAAKNHFNTGSLVANSVTNVSQWKATQTGMSMSLGTDVLGSTMGILGAVGTNLASGAAGMMGGGRTHDETSESQSAISGNITVNAGSISGHYTTDVAKANAALENGFDAKKLTNQLQAQHLGGQLAGEVGGLVADQLEKAGVAGFGEKGIANSYGRIALETAANTAVAAVSGGNIGAAAAGTAAGGLATSAALAGVSRWALAHSNGNIDDAVMLASAMENLIGSGAGALGGMIGGAGTGSTGINALNGASQASSNIISGVTSEKLWPRNSSLQ
9	1770919..1771710	PHAGE_Mycoba_Milly_NC_026598: hydrolase; PP_01905; phage(gi764160985)	2e-09	MQRREILTGLPIAAALGGISAAEGTPMHRPVVLVHGLNCGGWVWRFVAPLLTARGFDVITPTLTGTGDRAHLLSHEITLETHIEDVIATIDMLDLEDVVLVGHSYGGMVVTCVADRLRERVSRLIYLDALVAQNGKTAFDILPVGMADTRRERAHTKGADVAFPVPPESAISFPDPERKDWFYAHLRPHPVGTYETQARLSHQPGHGLPVTYIAYENPALASIEPSRAYARSRSDWHYRSEAVPHDAEVVYPEKVAGFIAESV
10	1775995..1776010	attR GACAAACCCGACCTTG	0.0	GACAAACCCGACCTTG
Region 4, total : 45 CDS.
#	CDS_POSITION	BLAST_HIT	E-VALUE	SEQUENCE
1	1782874..1783854	PHAGE_Escher_D108_NC_013594: DNA transposition protein B; PP_01916; phage(gi281199648)	2e-38	MAVIDKGNAEMAREELRARVRTEQARLGLSQKQIADQAGMSSGTFSTWLSNTYKGNYEAYDVLIVKWLESCSARSRIRAVRARAPEFVHTHTARKLMALMEAAQYGPELGVVAGAAGVGKTMAAKAYAGQNPNVWIITADESMKSAAATLIEIEDVLGCASERGSRRVRRVERFLEGRQGLIVIDEAQFLSTKAIEQLRSIFDKTQTGIVFMGNAPLNDRFGALGRLPDHAQLFSRIDEWEIIKGPVSQDVDAILDAWGELDSDVREACRAVAVQQGALRSMNKVLLKASTMARVRNAETISVDDVKAAWKKHMTGEMPAFRRIAA
2	1783858..1784055	hypothetical; PP_01917	0.0	MTPIEHLPARDKLTAVNRALSFHRTMPFGLHKTPERLRMIAELEALRSVAIAASRVRFPEPGDVQ
3	1784056..1784256	hypothetical; PP_01918	0.0	MTDAVCGLMVLYLISMVIVLIGLSQLMEWVRCRELQANLRLLDELNSPPETQPWADRVRHAHGEEA
4	1784257..1784994	hypothetical; PP_01919	0.0	MTQTRYEACLSLLEQIEQQADLIEDRYPKEDGCYGSCESEAGEIRVAAHKLGVLLKAARAQPLGMEGGGKEPIIWALLDLDCCNVLAITDELKHVESLNAKFGYPVMTPLFAAIPEEELQTERRKEQGRLLHALDSEVERIHAHCCSGADMTVLWRELRNLSARIVGITEPSNALNDRVKGYFVFKGELVDALNELVRVQEDFGQADRADLQGQITAAPQHMARLAYAVREVIGAWRTVREGDAP
5	1784995..1785294	hypothetical; PP_01920	0.0	MTLSKRDAMLARLKSCAEGTIFEQQERLEGTAIAIRQMIRSNAPNANASELAMIARCFPDAFSGTSARRAVVAEFFDSFPDDLPAVRIAEGLENNHAQA
6	1785295..1785531	hypothetical; PP_01921	0.0	MGQELVRLGTDMLALKGTITAAEMRALAKYLTQAGARHQSVVNAANILSAKDRLNRPFRPHEVTCDGLTLIPVIGVVS
7	1785532..1785810	hypothetical; PP_01922	0.0	MSGKTDFLQLWKKACSGTSFAQDDVSELLRKHAISTLVKQPPGRSAMETADRSRAMIKRNQGDQEQARIVVSFLSSVPAGTPIKTVVGGLWV
8	1785811..1785993	hypothetical; PP_01923	0.0	LSEFLAHFDAQTAGSVLPEPHIVALAKDIAATALALSIHTSALSLALSGTDGGAVTVTRH
9	1785994..1786617	PHAGE_Rhodov_vB_RhkS_P1_NC_031059: hypothetical protein; PP_01924; phage(gi100016)	2e-19	MNTIDKAPVKTIPDASGRQVPVNCIRASTVLQHEVAEKIRDHFRELAAFNKAKKEQIFEAMQAYRDLLAQEYGLRSGGTRGGMTIRTYDAHTEIKLEERDYHRTTPEISIAQELVAQIIDDYTERADVGLRELVMRAFETDKKNGRPNVGDILKLKSLNLEHPLWPEAKRALEDSIAVLASKTAVTCRVRPNRDSKHEQLVVDFSRV
10	1786678..1786848	hypothetical; PP_01925	0.0	VQMVKSGASPIEAACAIGRIDHNAPVCVMSLMSATPADAPLPETLPPGDDHPGDPT
11	1786849..1787325	PHAGE_Rhodov_vB_RhkS_P1_NC_031059: general stress protein; PP_01926; phage(gi100019)	9e-12	MTRRPHLVQHVSANTGRNVFYVKLHVARKELALDEDSYRDILQRVGGSYHAKDMSISGLEAVLAEFKRLGWKPKPGKRRTPDSVKAQVRMIYALWKDLEPYVRSSDKLAALRSFVLRQTRTAANPQGVSAPEFLDAAQANRVIEGLKDWLRREKEKQP
12	1787326..1787463	hypothetical; PP_01927	0.0	VLCVASYALGACQGTGRSLNFDAVKVCDKAGRLGEIVHRLKAMQS
13	1787464..1787718	hypothetical; PP_01928	0.0	MSEGVAVQAQVEKAHLEALEASLMHLRRHVGVAIVGGLDGNRDALEQKIGQMQAILHIMGQHDEVSPARCLAYATAFLENLKVR
14	1787719..1788108	PHAGE_Rhodov_RS1_NC_020866: hypothetical protein; PP_01929; phage(gi472342899)	9e-07	MTVPAPANIEFLAQAVGDDAALCFIEQLAGQEIFIPAVAAGSRLETLYGPEIASALSSRYPKEMWRVPVCRDWRIRRYLAMGLTVNQIAARAGVTSDSVYRSLRKPYRGKMAARPEKPRYSDHRQISLF
15	1788109..1788666	PHAGE_Sulfit_NYA_2014a_NC_027299: putative endolysin/secretion activator protein; PP_01930; phage(gi848469659)	5e-12	MVQWCGDAKLVTAETMKTISDATFRAIYSALYWRPVAGDDLPGGIDLMLADFCFNSGVRRASNQLQQIIGMLKDEIDGNIGPETLAALAAVTPQTLAPWMRGVYAERLQKDLGVAVDGKIGPVTLDAAVRQGAVMRMVVYALAGRQEAAYRSFESFNIFGKGWLARLDARLTRALELLEPQRAIA
16	1788667..1789041	hypothetical; PP_01931	0.0	MNWKSLLSSLSSTILSVAQPLLGSIIAGKATKYQDIAQTAVKSAVTKIDGGIDQLAESYNTFREDNPVFVEAQDEFLALAKNAGIVIPDLAVVQTHLKEAIFDLASGLFPNAGLTPPVASTPAV
17	1789042..1789362	hypothetical; PP_01932	0.0	MTPQTPAGSVVQAVAAGAAAGAASSPILVLILLAFVLLAIGLSIAAVLMGFGNRGRIEEIERDHAERRAFENRTERAIETIARDLRNNTDLLHVMIRGHMDKKDIP
18	1789363..1789674	hypothetical; PP_01933	0.0	MNAVKRALEEDRRWFVLDAVAQMETRTLNEQLILRMIHGMGRPVNAEDLRNDLLLLERASSIRIEKLPRPTGGELWVVTLTTEGLEVRDCVRVVHGVAARKPL
19	1789675..1790214	PHAGE_Pseudo_JBD25_NC_027992: terminase large subunit; PP_01934; phage(gi100031)	4e-09	LEIRDEIGRLRGEGYTIDEILAALRELDVVTISRSTLGRHVKGMERLGAKLRHSRNIAEALVRQLGDEPASRAAQLNIELLHTTITDLFLAQNDDGEIDENGKAALNGSPEGIMLLAKAMDHLTKSAKADAEYAARIEAKVEARFKKQAEAGLAAVAREKGFSAENMAFIRQQILGTSK
20	1790269..1791780	PHAGE_Vibrio_12B12_NC_021070: portal protein; PP_01935; phage(gi481019169)	2e-105	VLSHNITVIEKSRRIGISWVLSWLAVTVAASAPSGGGMDVFYMGYEKEMTRQFIDDCADHAKILLSAAVEVSEELFVDDERPEQSIKAFRIEFASGHKILALPSVARAFRSKQGLVILDEAAFVDDLRAVIKAALALRIWGAKIVILSTHKGDTNPFNSLVEEVRSGRKKYHLMRITFEDAVAQGLYRKIAAKQGIAWTQEGEDAWKAEILDEFGDDADEELHVIPSPSSGTYLPFALLEARTDRNAGVARWQCDAQFALQPEAIRTGECAKWCGEVLLPLLDALDQKTPHVFGEDFGRSGDLTVIWPLAIDAGMKRRTPFTIELRNVPFDQQRQILFFVLDRLPRFRGGKMDARGNGQYLSEVAVQRYGARVEAVMLSESWYRENMPPMKAALEDDSF…
21	1791781..1792011	hypothetical; PP_01936	0.0	LNSASIIALSAIAAAILGFGVYVIHLARGAQATKEAKEDARDTEQAANTQHAMDAAQIQAQADPDALERSLQDGTF
22	1792018..1792158	hypothetical; PP_01937	0.0	VAYSRQDDDALLAELATLPRDRYPQLRRYLTDWHAARTSMRRCTKG
23	1792159..1793925	PHAGE_Rhodov_vB_RhkS_P1_NC_031059: putative head morphogenesis protein; PP_01938; phage(gi100034)	2e-70	MKLLDQWGNPIQPARLSEPVAGPDVFGNRPAIISTPIIGLDPEMMGAAMRAADQGDSLAWQTIAETLEERDLHYLGVLNTRKRTVAQLPITVSAASSDPEHEKHKEFIEAWLRDELVAHMLFDMLDAIGKGWSVHELTWALNPGENRIVDAVFRPQRWFDVSNQDGSTIMIREFNSAPMPAVVPGGVDQIGFIALDPRKFVVHKHPSWSGLPLRSGLTRAVAWASMFKAFSSRDWGLFVQAYGLPMRVGFYRPGATEQERRVLMRAVTDLAGAAAAIIPEGMKIEFHEPKNGAGANDIHQRRCEWLDAQISKAVIGQTGTADSKQGAHASGAIHRMVQEDIERADARLATRTVNMQMIEPMIAMTFGPQKAYPKISIGRPDEVPMDIVTTALQWLGPQD…
24	1793926..1795278	PHAGE_Pseudo_JBD25_NC_027992: putative head morphogenesis protein; PP_01939; phage(gi100034)	5e-49	MADDDATLKAVRLPPNDALAYFRGKENVSTVHWTDLWHEAHARGFMVAGAAAEGLLKDLRAAVDKAIKGEIVFKTFQKEFEAIAERHGWKYNGEPGWRARIIYDTNMATAYSAGRYRRMSTPVAREMFAYWRYRHHACPHPRVQHMAWDGMILRNDDPWWNTHFPPNGWRCHCDVEVVSEGMLERNGWTVSDSPKIEMTSWINPHTGQVHQVPVGIDPGFGYNPGKAWEDNEAARVGRPAPVLVPEGLIKPPTLRPGPADADPEGSEITYPFDTHPLAPRPEEARPDLARPNPLSPEQRRVSQRNAIDAFMRMPVGKPEVGTVPESVRQILGAETPHVLLSDETLTKQNLRHPEITAEEYGKLPDILAAPHIIAQDGARRVVFFRRDGKDYRAALKTTQ…
25	1795279..1795785	PHAGE_Rhodov_vB_RhkS_P1_NC_031059: hypothetical protein; PP_01940; phage(gi100042)	2e-14	MASITITGSFQPMREALTRIAAIGRDPRPVLAAAALPLEDNVRHRFDTGTDPKGLKWSDYAPLNPLYAQDKKGPGILNETGELRRTITSVVEGHAIVIGSPLVYSTIHQFGGVIRAKNAPALFFVMGGHGFRRQSVTIPARPYLGFSTEDREVIVSELARFFRKAVSG
26	1795852..1796778	PHAGE_Rhodov_vB_RhkS_P1_NC_031059: capsid scaffolding protein; PP_01941; phage(gi100037)	1e-15	MHVLPAGRFTGRNGVGPFVLDDAQAVIQASLADGKIAIDVNHATDLKGARGEHAPAVGWISAMEARADGIWAKPQFNKAGRHMMSELEYRGVSPVIDSAPSGRVQRILRVALTNTPNLTLTTLHSSQTSETSMDPEEIRALLRLAPDATDDELRAALKAAGSRTTLHSTIAGVVGVPTNTDQAALVAALTSKIGGDNAAVAALKAQLETIQKERSQGQASQMLDKAAAEGVVITQEMKESIVTLHSSDAKLAANIVASWPRTNLNKGSVTLHSAQANASGGEVFESLAAGFGIDAADLKKAMGDRHGA
27	1796779..1797252	hypothetical protein Daes_2403 [Desulfovibrio aespoeensis Aspo-2]. gi|317154106|ref|YP_004122154.1|; PP_01942	9e-06	MALEADRALVRLMVARGPVFGYAVAAGYVVYRGSITALLSDGTVIPAGVAAPAGLTVVANIGLASQQQNNMANQNVVSPNYGPGPVEIDRGTWALPFDEAPSWANYGASVYAIDDQTVSLSDGSSPASGNTPAVAATRLKIGVLAGFDERGTPFVTI
28	1797253..1798197	PHAGE_Rhodov_vB_RhkS_P1_NC_031059: major capsid protein; PP_01943; phage(gi100039)	8e-61	MQITGPNIAALSTAVSLAFNKAIGTAPSRYSRFAQVVPSEAGENFYPRLPEMPGMRKWIGSREIHQLSTMQQYAIRNETYEETIAIKREDIADDRWGVFMPYIEQLALDAAELPDQLCFGALENGTKTTCLDGQYFFDTDHQAVNANGETFTYPNMAGPKAGETGGPAWYLLCTTRALKPIIFQTRSPFTVTARTRLDSDNVFENREFQWGVDGRCAAGVGFWQFAYRSTRPLTIQSFGDAKAAMASLCRADGTPYGIVPDLLMVPSNLEQAGRTLLKAQLAPLSAGNNFATGTNPWIGAADLMVAERLSQLNG
29	1798198..1798686	hypothetical; PP_01944	0.0	MAKTPTRAQSGAHDKTPDQEAPVQGANAPGAEAPVPANGEAVNYPLADEDGARMIASGGAAGGFHDSLRDTQPHEFGGVGHTLTIGHGHPHGESKAAGHILLPEGRTRPLQVGDLVITCQEPGFRRAGVAHPAFAIHDKGRFSPNQIDLLRNESKLTVIEIG
30	1798687..1799103	PHAGE_Haemop_SuMu_NC_019455: Mu-like prophage protein gp36; PP_01945; phage(gi418489087)	8e-13	MAYATPDDLIARYGEVEIIQISTPDGQAMDQVNVPRVAIALGDASNMIDSYLRRRYVTPVATPPLALTQSCCAIARFLLCQMGGTTSAEKVKEAYQAALSWLRKVEDGSVTLDGELLPNTSPNWAEFQGRERTVKCWS
31	1799113..1799739	hypothetical; PP_01946	0.0	MNPAPDATEIQAFQAIISGGVTGAAFQAIQAQLKAFFDPAWFFHAVIPAKVSQATWKDITRTKNLIGLGWSHWSPESDNAGTFRGTLSFPLILMVSFDKPEQRYLGAQIGSGAYLPGMMGLQEYAIAALHGFTIEDIGTCRVTQVSSTELADWNQDGKATVVLEITIPDVALDLPTVTATLNDFLRLQEQLISDQTDLGTTTITVREE
32	1800013..1801512	bacteriophage Mu tail sheath protein (GpL) [Thalassolituus oleivorans MIL-1]. gi|473827894|ref|YP_007681177.1|; PP_01947	1e-49	VSEFTQIPGIYNVPGAYTEVQFTPPDTVFAMPVRVLFIAIQQGLAAATLHQNVSASQMQATMGIGSSASIAIAAFTAACPGVAMDVLALPPGAGAQASAATIVFNGPATASGTRALYVGGQRITFGVSSGDTPAIMAANFLSAYGAGTTSSVLAQTGLIASATLSSDGKSTVANSVTLTALEESQYGNDIDVRDSPYVSDAVAGATLDITPAGGGAGAPSISAALGLISATWYTDIVTLLYDTPNLQTLAQEAQRRYGAMVKQDARVYAALRGSYGSLLAVTAQLNSMLLNVIGAQNPMWTQAAIVGAFAGQCCMSLNSDPSVQLRGLTLDAVAGMGPQGLDAFIPSQRNVLLGSGISTFTIGSDGTVALERVVTTYQNAASGVPTGLPQDIMVPAIAS…
33	1801513..1801875	hypothetical; PP_01948	0.0	MAATVGIVRLWWAGTQYNVVKGSSIRLSGIRNVTQVAGYQAFRSAEFQAGEVRATLLIAKGMKLSSLMPGEEQELQWQADTGQLYTSPDAFILDAPVLSDDGGKAPVVWNFSSYIELDAS
34	1801876..1802319	hypothetical; PP_01949	0.0	MDFDPTRPSVHHEHAHVTPQVLDASERADKPVTVDMRPKLPEGARWNTDGTVTIALDEPAGITRRSGEHEDIEQIREITCRRLRGGDMIDAVDAEGASGRQLFLLKRMTGLEDMKGELFIRALSHADYLTLVEVLGVFTRRGQKTGR
35	1802320..1804614	PHAGE_Geobac_E2_NC_009552: putative tail tape measure protein; PP_01950; phage(gi148747742)	5e-16	MSDSLHTQFRIDLADGISGPIDKIIGMLARIDQALSRVGGTDPFDKMWEPIEQTTRATNTFSETIGRAEASMQAAIGATTALGEGLSRTDASATATAEAMGALAGAADRVDQAFAEGNQAHGFDRLHEPVERAAQATRALDEALRRTDASMASAEGNTRVFDESLAATASGATEAGDALNRMGQNAQRAAEQAMSAMRAVQGTLNSGYGASGNGGGGFPSGPTGSRAYLGNVHHSLENVHRSVEEGMGRAFGAAAAGFGLIEPVHAAAEFDNTLTHIGIGLGYDGDANHKFAASYGMQINQLARATSQRGVDLADAAGFFSREGYAGDKLDAVLPTVAHIATAYNAAPEAVAKSTFALQENLGVSDKALGGALASVAIAGKQADLPFEKLAPLLPQVAA…
36	1804615..1806021	PHAGE_Entero_SfV_NC_003444: tail/DNA circulation protein; PP_01951; phage(gi19549005)	3e-17	MSGSLSTAGLGEIGASTLSSLGGIAGLASSALGRILTTASFRGVTFFMPDVREAGGRRVVRWLFPGRDIQRFQDFGAIEGPIQITGLIIGDDYVIRAQRLRKAFLSAGPATLVHPWYGRLRVRLAEQPPEISFSDREIRVARFTASFYRDPETSGAPGLFASITDTLTNLMTQADGLVDEGILACQGVLSVLAIPLALSGAVGSLISQISGVWDGLLGNAPQPLQDATAAAQVTLANGVSPPLVNDDTSYADAVSTAFAVVPAAIASVAMPAQAAAIAPASIVANGVTLTVAPATIVTILLQGASKIGTVALNTSQTSQAPASVLALGVVARMVTLAQAVAASTSVSYVSQPDALSVRDILVAAVDALGADMGNAAAAGAPLPMSAMWGALRDLRLAIL…
37	1806022..1807380	PHAGE_Escher_D108_NC_013594: baseplate assembly protein; PP_01952; phage(gi281199689)	3e-27	MSDTRTVSRRPMTVKIAGRILETWTSCEVGRDLADIAGSFRIRYLDELRSAALLGGETPEVAAIHPRDSVEISINADVVLKGWVDDINLTADEHTAEAIISGRDVTGDLVDCSANPTGPGEYRQIRLESLVGHLTNPYKITLDQQIETGAPFTLVALDPGDTVMDAIEHHARQRGVLVTSDGIGKIVLTQAGTTRASDSLSFPGNVRGIEVRISSRNRHSDVWVKGQFKSQLRPVKTTLDANAAPLSAAPAQPPAAPSHRKVELASTTRYGHWVDPEVQRYRPRVWMAKTQSGGSVATQQTTNPPLDSTAQGLSDEVGPPLAFHAGTRHKKRKATKPREDADPWTLQDQAEWRGRTTRAGSTAHVYIVPGLRNSKGDLWLPNQLVSVTDLYSGLTQDML…
38	1807381..1807932	PHAGE_Salmon_118970_sal3_NC_031940: siderophore-interacting protein; PP_01953; phage(gi100025)	7e-06	MLAAFHMALRSLFSRGVIADIDDTGGDQTVTLDTHYGVTRSSVPVHHPFGLAAHAPHDGAVTHVVANGSDPADLVALPPANPSVARMGNLAEGEVCLYDSMGQKLYFQGGKIVRVDCASELQVRIGGTTVFDVNQDRIYTSLDIQTDGKITAKGDVVAGKVSLQTHIHTGVQAGSGTSGPPQS
39	1807933..1808424	PHAGE_Escher_D108_NC_013594: hypothetical protein; PP_01954; phage(gi281199691)	5e-07	MSAASFSSMKLGIKPGPGVIDLFIDPVGNGRGRIAIDRTPATPLLVALCSDRRAASDDVAPEMQTAPAGTQAPLFSRRGWVGDVLLEDGQRFGSRLWLLSRGRASEATRVAALDYANEAVASIVDYHGIEVDIDAAWYDKKPGILIITAQALGLSVNAPVTTL
40	1808425..1809522	PHAGE_Salmon_118970_sal3_NC_031940: hypothetical protein; PP_01955; phage(gi100027)	3e-28	MTLPIPSPDTLAQRFAAALAQQEFTASDGSVVRLDATAPQTLEQALSIISALDLYQVYLYARDIGLELIVSTSTESGLLPNHAEIWGVPRESASSAIGNFIFATSQAVDIPVGTLITIDGSTQWAVTTATDIAANATASVPVMATSAGTAGNLAANTSAQLVSPIAGVVSIVSDQSGIAGGAAIESAKAWKARIISVIQNRSSGGTLANYETWALAAGAAYVYAVRAYDGPGTVGIIVAMAGPTAPTPAQIVAIQTYIDSVRPVRGNATVYSAQIVPQNMTIALNPDTSAAQAAVQAALAPVFLAAGIGGKNTSGRITIAALEAAIAAVAGTQNTLIAPANDLLVPINQLTILGTITWQAGGGSS
41	1809529..1810083	PHAGE_Entero_SfMu_NC_027382: hypothetical protein; PP_01956; phage(gi849255278)	6e-06	MLAPRTADQIATQWVEELTPSGNAWSRDRATNLAALYRTLAIPRAQLEADIAALTSEIWPGSAVTLLSDYQSLLGPDPLGRDVGDLSQAQLQQLLGQRWVASSGQTFEFYERMAASYGVTITIIEPDPAICGPAVCGEAICSDYTLRFYWIVNMDQDSANLRAAIKLNAPADTIVVFMVQGVYV
42	1810084..1811178	PHAGE_Mycoba_FlagStaff_NC_028861: minor tail protein; PP_01957; phage(gi971750077)	5e-25	MDRTQASGYTTNAAGKRVYADKVPGQAQGTSLVAADRTATQEEIVGAIEASGQTPDPVNLAQLQAAIKVLGNAPVWSAAFAKLIGGYPNRFLVQDASSAGVFWLSTVANNLTTPGESGASWGNLFAGLATETYAAQYNPGRYLNTTVITSSQTYTVPAGVYKIRVRLQAAGGAAGGSADNTGGNGSSCASSGGAGAYVEAIFPVTPGQQIPISIGVGGVGVTGKAGGTGGATTFGPFGSFAALSCPGGLGGYAGIQTSSSAASSIPGCPGNGMPSGPNIVYAVAAAGGLPGVAVLGTAAAPPGSNSPMGAGGSGITGYNGSTSQPGGNAGGWGGGGGAHANQQAAQNAGGAGANGVGIIDEFSA
43	1811212..1811595	hypothetical; PP_01958	0.0	VIRARLQAQRNRLDAGQQALTLVDQSQKQQAMLSAALERSLANELSARAREVATGDLLQEIHVHLIGARLRCHDVEMRFGLEPTVFPLIPAFPWKIASDDTALTTGTGDRSTTNGVDETASAGKVHS
44	1811599..1811751	hypothetical; PP_01959	0.0	MTFVGIPRRRSTQINSAQMAAWMASLPFSPPSAGGWWSNANIPTLTGIIQ
45	1811752..1813524	PHAGE_Gordon_Ghobes_NC_031028: hypothetical protein; PP_01960; phage(gi100027)	2e-06	MKRFLFLLLAVGTMPAAALAQPSTAQFVPPNGLPMNTPLGTARNADGSGVVTFATLQAGISSAVTSDQMQSALADYLTTSAAASTYTTPAAVSAAVQTEANRAAAAEAANAGNIAALQSGTLSKAEAATSYLSLSGGSLTGSVTTSGDPMKAGFVVLDPQQSGMFTGLWYDANKGEFTIENNTGSNNALAIKTTNANGFAAIAFDGPDMTYGGNFEHGAVGWGPRVAYGPDVGVDYFEISRFTYDGTFNRQPVPFMWQTTGTELVPWGMTTAYGIVTKGSATITCVGGCTFPGDTGQILDTPAEYGLFPAGTTIVSGAGTKTMTLSKAALASSASATAGTYFRFGNAEGSQHDFLVYTPMGNADYYRFSDAKWGNFTNAPYFSIDRVNGRLGVLNPLPA…
Region 5, total : 12 CDS.
#	CDS_POSITION	BLAST_HIT	E-VALUE	SEQUENCE
1	2051277..2051290	attL GCGCTATCTCGGCA	0.0	GCGCTATCTCGGCA
2	2051545..2052309	PHAGE_Mycoba_Bobi_NC_022055: integrase; PP_02235; phage(gi530545402)	1e-13	VPLEEALGHLRIDQIDQKRWDAFAASRFKKRGEANVPISPGTLRREFNVLRAALRRAWKDGYLVRPPEIEPPRDSAPRDRFLTKEEARRLIDAAQTPHVRLFMALAIYTGARKGSILALTWDRVHWTTNMIDFQEPGRALTRKRRATVPMTKALRDEMEAAFDERNGDYVVNWHGKQIPTGLRWSFNKACERAGLTWKPTPHHLKHSLASWFAMDGVPIDQTSDWLATDPQTLRRVYRKFDPSYLKTIAEGFKL
3	2052310..2052483	hypothetical; PP_02236	0.0	VAVEARISTSTLGFLIKGQNSTINTVLSVMAALKAPPEVMAAIYADFVEHRKERADG
4	2052484..2052717	hypothetical; PP_02237	0.0	MGEWEKAQATKNAIVGFAKHDPEISVHLGALYGVADIAKDEITIINDWGGEVSFPRSEFERLGGYLAGVMIEEAAHD
5	2052718..2053497	hypothetical; PP_02238	0.0	VTQHEQKPESAEFRTRADQVRELCASCSHEEVATAHILEAEARGAAEQRQKDEEKRELISANLDKPGLIEWSVHILGPDDVHPCGSRAEAEVLAEETNILAGSTNKGRSDDEFVTYAAYVVPRFKADREAEQRRKDAEGAEPDGWQYEYARGDWHDTRSPEWFIERGTKVRPLYLRPANVATLEDRVKELEGVLKEAAYALERVKDGKRGGYNARNGKFVSLQMSDGERGDIIHSEVTLHCEYALEALRSAIRAGGEHG
6	2053498..2054292	PHAGE_Verruc_P8625_NC_029047: hypothetical protein; PP_02239; phage(gi981221153)	4e-36	MTLEQKKEIVGQKIAVWFSCGAASAVAARETIRLYGARNSVRVLNNPVMEEGWDNRRFLADVEEWIGRKIETVTHPKWPMASAAAVWEKKRYMAGVRGAPCTALLKKEARQKWEAENPCDWHVLGFHAGESRRHRNFTITERANVLPVLIDAGFTKERCAQILVDAGIRLPEAYALGLPNANCIGCVKATSPTYWNLIRQVAPDVFHARCEQSRRIGARLVEVRKERIFLDELSPDVMGGPLKAIQMPECGIFCEERETAEITQ
7	2054293..2054883	PHAGE_Vibrio_VvAW1_NC_020488: exonuclease; PP_02240; phage(gi460042915)	1e-29	VSILFFDTETTGLPNYGLPTNHEDQPHVVQLAAILTDERGEEQAQLSVIIKPDGWVIPEGAARVHGITTEKASRYGIREVVAAGAMYDLCCAADTIVAHNIKFDRQIVGTMFARAGRGWKLPERQACTMMNASPIVNLPPTERMIAAGYGDKPKAPSLAECIRHFYGEELDGAHDALVDVRACKRIYFEMLEQVPA
8	2054890..2055405	PHAGE_Salmon_epsilon15_NC_004775: RecT; PP_02241; phage(gi30387413)	5e-28	MLAGIQKRIRNSGEIASIQAHVIYENDHFIWHQGIDASIEHRPLFPGDRGKAIGAYAVAKFKDGSDPQFEVMDVAAIEKVRAVSRAGKSGPWVQWWDEMARKTVFRRLSKWLPMDTEAEDLMRRDDENDAQDVAAPTIRVEAEAPSKLDALEHDDDGVVLEETRELEGSAA
9	complement(2055394..2056350)	PHAGE_Cyanop_PSS2_NC_013021: tail tape measure protein; PP_02242; phage(gi254729539)	9e-05	VLGHLGSIIPGIGTLLGGLIGGGAGGLLGGLFGHKKNPYTIDQVLLEGDQFSIGKTWNQKQTDTITAQLKADIASLNTMMSSMGLKAGNAYLGTVRDDPNNKDPDQRSVSLKDLLGGVQLRSDDNATFSQALAQGMPASFDSVAAFQTAVTQLKGMADTVDALGVAVSKFNSDGTVTVSGFTEATGDLRTALDAMLNGKTVSTSDLQSQVATITEFVSNTMPNLMKATVDGQQSWVEQMEALKKTYADAASQAGSYGLDGNALNDKFSALYREGYEQNMRSLSESGQSVKARLLAAQGDQQGADLLDFDLSASQQSRC
10	2056339..2057118	hypothetical; PP_02243	0.0	VTQHEQKPESAEFRTRADQVRELCASCSHEEVATAHILEAEARGAAEQRQKDEEKRELISANLDKPGLIEWSVHILGPDDVHPCGSRAEAEVLAEETNILAGSTNKGRSDDEFVTYAAYVVPRFKADREAEQRRKDAEGAEPDGWQYEYARGDWHDTRSPEWFIERGTKVRPLYLRPANVATLEDRVKELEGVLKEAAYALERVKDGKRGGYNARNGKFVSLQMSDGERGDIIHSEVTLHCEYALEALRSAIRAGGEHG
11	2057119..2057913	PHAGE_Verruc_P8625_NC_029047: hypothetical protein; PP_02244; phage(gi981221153)	4e-36	MTLEQKKEIVGQKIAVWFSCGAASAVAARETIRLYGARNSVRVLNNPVMEEGWDNRRFLADVEEWIGRKIETVTHPKWPMASAAAVWEKKRYMAGVRGAPCTALLKKEARQKWEAENPCDWHVLGFHAGESRRHRNFTITERANVLPVLIDAGFTKERCAQILVDAGIRLPEAYALGLPNANCIGCVKATSPTYWNLIRQVAPDVFHARCEQSRRIGARLVEVRKERIFLDELSPDVMGGPLKAIQMPECGIFCEERETAEITQ
12	2057917..2058120	PHAGE_Pseudo_F116_NC_006552: exonuclease; PP_02245; phage(gi56692916)	3e-05	MNASPIVNLPPTERMIAAGYGDKPKAPSLAECIRHFYGEELDGAHDALVDVRACKRIYFEMLEQVPA
13	2058121..2059326	PHAGE_Xantho_CP1_NC_019933: putative head protein; PP_02246; phage(gi431811003)	9e-95	MSDYEQAIRDLKSATDEVKRFAETSTTELRNLGKVTEETKASADKALAEMNGLSARLADIEQKAARGGQEGSRETRSLGQRFVESDEVKAAIGAGDRFKGRVTVEMRAITSGSTTGNSGTTGLVVADRQPNIIQVTPDRRMTIRGLLIPGTTQSGAIDYVRETLFTNSAAPVAENPSANKPQSELKFDLVTLGVKTIAHFVMASKQILADAPMLASYVDGRLCYGLAFKEEDQLLNGDGTGQNLNGLMNQAAAYAQPAGVNVKTETMIDRLRLAQLQATMAELPATGHVLNPTDWTSIEMTKDTQGRYIFANPTGLAGPVLWGLPVAESLSMKAGNFLTGAFAYAAQIFDREDATVTISTEDRDNFVKNMVTILAEERLALAVYRPQALIKGTFAAAAT…
14	2062038..2062051	attR GCGCTATCTCGGCA	0.0	GCGCTATCTCGGCA
Region 6, total : 35 CDS.
#	CDS_POSITION	BLAST_HIT	E-VALUE	SEQUENCE
1	2439649..2441286	PHAGE_Bacill_SP_15_NC_031245: DNA polymerase clamp loader subunit; PP_02615; phage(gi100150)	7e-14	LALSRRSHLLWIASDAGIYSLGEAVQAQPKPIHGRDGKTVSQMARTLALRADDTPWAVIGTSLYRRDADGAWVSVLTEWPNAKDFIPMAMTFSSRDDLWIGGIRAKNGLMHLVLDGNRISRIEQIGADRVGSELIFSLLWDKRHRLWVGTENGLAVYNGLEWIRMTRDDGLLSSNINQQGLSEDEDGSIWVATSRGVSHLLHPERLFERQTLDPVFIRVALGDHLLPEKAVPFSRDPLVVTLGTLNTALANTTYFRYRLEGVDQNWITTTTGEIRYNFVPPGHSRLVVQALNDNRNLISPPITLEIRMQRPWWTTWPLIMLYTLSVVALPYAFTHLRFRYLLKRQHRLEALVDERTIEMRAAQHALEQQARQDGLTRLMNRRTAEASVSRLLERLSRLD…
2	2441287..2441763	ApaG protein [Gluconobacter oxydans H24]. gi|414341381|ref|YP_006982902.1|; PP_02616	2e-54	MSSQKPAPPRLVADPDASFAEAIETAPRYEATTRDITVSVRSFWLEDQSQPEEHSYAWAYHVRIENGGDETVQLLSRSWEITDGRGKTDHIHGDGVVGEQPILVASEIFEYTSGAALPTPCGFMRGVYHMIVPATSERFEVVIPPFSLDSPHRLGLVH
3	2441764..2442951	O-succinylhomoserine sulfhydrylase [Gluconobacter oxydans H24]. gi|414341380|ref|YP_006982901.1|; PP_02617	4e-169	MTDHSYGPSTRLLHQDVSRTEHGETSESIFLTSGFVYESAEQAAATFTGEVTHYQYSRFGNPTTDALQARLALLEGAEACIVTASGMGAVSSALLSHLKQGDRVVASRALFGSCYWIVTTLLPRYGIETVLVDGDDWAGWEEALATPAGAVLIESPSNPMLDVLDVERIATLAHKAGALLMVDNVFASPVGQKPLELGADVVLYSCTKHIDGQGRVLGGAVLGRKQWIEEVLQPFTRNTGNALSPFNAWVLLKGLETLPLRVNAMASNASAVAHFLENQPGIKRVSYPGLASHPQRALVEKQMSNGGSLVAFEVEGGKEAAFRFMNAFRLIAISNNLGDARSLATHPATTTHSKVAAEERARLGITDGAIRLSVGLEDSADLIADLKRSLAALNG
4	2442961..2444703	PHAGE_Delfti_IME_DE1_NC_028702: DNA-directed RNA polymerase; PP_02618; phage(gi966201621)	9e-71	LFSGGFYVHKIPLVRTNRRSFNDKGRASVSAADLDSVNRVQATPWRVNQFILDLQTKAFADRTSLPGVPLELPITPLGSPSYEAWRDSLRTGRRHRAMSDTTWEALTDEQRKEHKSTMAGIYDHNAKVVGRKFAFMDLISVAQELRNERAVYFPHNRCFRGRIYPAINSGPHPQASDVGKGGIHFAEGKKLGSLGYFWLLVRLANCAGKDKMTLNERVSWALDHKDQVRDSAAHPEECLWWAEVNGGDEAWSLLATCHELNLAWSSGNPEDFISHLPVPMDGTCNGLQHLSALALDPIGAAATNLSARNTRQDIYIDVGQSVRERVLSDASQGISEALEWEPRMGDTGFLRSLVKRAVMTTPYGVTARGIRTQILNDDAIMGGISEGKGKAAEYIRGHI…
5	2444704..2444847	hypothetical; PP_02619	0.0	MNNVERTPARKRSQDLLCIKSPNDTSMTCCQLVVSIMLNVAPALDTT
6	complement(2444866..2445018)	hypothetical; PP_02620	0.0	VALRLHGFDQAEEHVLQSCGAVEAITDTKGAVSVLAVGLDKFPLEDLLGK
7	2445082..2445783	PHAGE_Delfti_IME_DE1_NC_028702: ssDNA-binding protein; PP_02621; phage(gi966201627)	2e-14	MAKAPKKILTSPKGTLQFPSLRVPNTKFKPEGAFEAPLILRIDDADTQAFLAKLEPFYKQAEAFAQEQFDALPKGSQKRLGEVNMNPLYSEVYDKDTEEPTGEIKFNFKMKASGERKDGTKWTSKLPVFDAKGKKLDPVPDAWGGTVAKVSFEVKKDFKTGQFGYFLPGTGAGGLTLALEAVQIIELSSGGARDAGGYGFGKEEGYEGSDEAEDTGWSGSDDTGASAGDNDDF
8	2445784..2445993	hypothetical; PP_02622	0.0	MEVIVTKPKATKRRRPGGDVDNLVKGVQDALTQAKVYEDDDNLVSISAHKRWARSGEPAGVRVILGVLN
9	2445994..2446209	PHAGE_Klebsi_vB_KpnM_KB57_NC_028659: hypothetical protein; PP_02623; phage(gi966203339)	1e-07	VHPYRHLKMPFLLALTLLFIGLKLSGIVAWGWALVLFPMLVIPGAWLLFFLLVLLGCAGGSRRARFEPMM
10	2446210..2446431	PHAGE_Mesorh_phagevB_MloP_Lo5R7ANS_NC_025431: hypothetical protein; PP_02624; phage(gi712913242)	7e-12	MTPQAKLVLDHLQHHGSISAVEAAAVYRIRHLPRRILDLKEAGHGIRKEPRKDPTGQRYVRYYLEKPSDSDRA
11	2446432..2446548	hypothetical; PP_02625	0.0	MPACIIVEQDDDFLNLSYEQANILAATLTAFAQELPRV
12	2446786..2448177	PHAGE_Delfti_IME_DE1_NC_028702: primase/helicase protein; PP_02626; phage(gi966201631)	1e-87	MGYRVGTDKHGSTVQIADYRDADGHLVGQKIRGKDKAFSAIGMKDAPLFAQHVWPSKGKRVVVTEGEIDALSVAQVTGLSWPVVSLPNGAQGASKALSAQIAWLEGYEEVVLMFDMDEPGRKAAAECAQLFTPGRCKIAELPRKDANEMLTHGDVKALTTAIYNARTYRPDGIVTLADVRDKILAPVEVGIPYLFPSVTAATYGRRKGQLIGIGAGSGVGKTDLITQMVETDITQLGLKVGILFLEQPIEQTGKRLAGKFAGKRFHIPDGSWTQDELAASLDEVAQEDRLYLYDSFGATTWDVIRGRIKYMVQHLGCESIYLDHLTALTAHMDDERRELEAVLEEMATMAKTLNFVFHFISHLATPKDGPPHEEGGRVKGQHFKGARAIMFWAHMLWGL…
13	2448184..2448321	hypothetical; PP_02627	0.0	MIYTEPQPSKVRLAANGAAIVLGFELLVIVGDGQAVAAKGVFKGL
14	2448322..2448861	hypothetical; PP_02628	0.0	LEPHHHVHISTGFLFVLMLALVALIVAVGFAIYLARKPKVIERVERVSQTRFIEPEADDRPYVRSVSSVGAYRAPPRQVDSTVAPPVRAYSRTAVPEPRQHYTAPYTPPYTPPVQSDRLFEGILLGELMGSSHGSTTVIESAPSYPLSSDSFSSGSDSSGFSYDSGSSSSDSGGFSCDW
15	2448862..2450736	PHAGE_Delfti_IME_DE1_NC_028702: DNA polymerase; PP_02629; phage(gi966201633)	1e-75	MPEEVLIWDCEANGLLDTATKLHSLQIGTVKGADSTIYCDALPGYPSIAEGLQRLSEAPKLIGHNVLKYDFPLIEKLYPGTLRLEQMVDTLVMARLFAPEERAHSLDEWGQRLGVLKGIFNGPWDTCTPAMMEYAAQDVVVTRALYNHVKEVEDWGCLDTELKFAWIMFLQEQNGFTLDIKAAQELEAELRGELADLLTEAQSAFPPRWVPNGKNAQAAMFTPKGDNKRHGYTAGCPMTKVILQDFNPGSRKQVGERLIQLGWKPKAYGNDGNPTIDDEILSRLPFPQAKKLVRYFAVSKQLGQLSDGKYGWLQVVGSDGRIHGRVNSVGCAPGRCSHSGPNLAQVSKKDLRMRSVWTARRDWKLIGCDGASIQARALAHYLAHYDDGLAINREINGDK…
16	2450803..2450955	hypothetical; PP_02630	0.0	LEAVKDAPLHTLENSEQFWIGQALDKAYGIRATFSPGPSTVTFTELANNP
17	2450956..2451558	PHAGE_Prochl_P_SSP7_NC_006882: T7-like exonuclease; PP_02631; phage(gi61806419)	1e-36	VLFTGPHNFRKKILPTYKGNRKGGKPLAYWATVRAVKERFRCDEVDGLEADDLMGILATSKGHEESIVVTLDKDLRTVPGRHFNPVKDSKPCIVTPAQANLKWFTQTLTGDTTDNYAGCPGIGPKRAETILSGWDGCSLTAGWKLVVEAYKGKKLTEADALVQARVAKILTRDDYDRDSKEVILWDLKGPQRLKLEDVVK
18	2451559..2451732	hypothetical; PP_02632	0.0	VEVLKGFLECPCVLSRMEKLKVRRISGVGIPAGEPDMRVSVSVYLIDDALFPNVDLV
19	2451733..2451984	PHAGE_Pseudo_PA11_NC_007808: hypothetical protein ORF022; PP_02633; phage(gi149408181)	2e-12	VPDEPASDAVFRPSHYARWNIEPITFISANNLDFLTGNVIKYVMRHDAKNGLEDLRKAARYLEILIGHVEREKAGAPIKVQAV
20	2451985..2452434	PHAGE_Phage_Gifsy_2_NC_010393: bacteriophage lysis protein; endolysin; lysozyme; PP_02634; phage(gi169257296)	5e-29	MGFPEEAVSLVASFEGFRARPYQDQGGVWTIGYGSTYLLNGKPVTASTPTMSEATAAALLRNVLVSFWDTTERLVKVPLTDRQGAAVLSLVYNIGETAFSRSTMLKKLNAGDLNGAADEFPKWNLIKGKVSRGLSLRRAKERNLFLSAS
21	2452435..2452614	hypothetical; PP_02635	0.0	MKITKTEGAALAAAVATIATAAGAALSTDWSTATITTFAMAVLTAVLKAASTFQTPKAP
22	2452615..2452812	hypothetical; PP_02636	0.0	LVGRMDGKLDMLLTRDKEQDKKIEDHEDRISALENDRAKVLGIWAAVSVGLGWLGDHLLTSFWTK
23	2452813..2453010	hypothetical; PP_02637	0.0	MLAALPLIASILSAVASDIPIIQELIQLLEGIFEAKREPTEDEWAQLVALAERAHADLQGAQIKT
24	2453011..2453166	hypothetical; PP_02638	0.0	VADQKAYNALHPLVLDAQAGASVTSLEATEAQAAVSAFYSYLATHNIGGVK
25	2453269..2454468	PHAGE_Mycoba_FlagStaff_NC_028861: minor tail protein; PP_02639; phage(gi971750077)	2e-22	VGGVSLDALSLRALLPFNSSLASSVGGYGLNAVVPDGSTPGKFWVSTVAGNVSVPGASGASWGDLFAGLVANAGGDLGGIVKASIDTPTGNPAFQDGTGNWHVVQPAGNYQAAGNYQPAGNYQAAGNYLETADTGQQSVAGPVSFMQNPTGTTAPLGTSDKSFATTEFAARLNSGRNLNTTVITSSQTYTVPAGVYKIRVRLQAAGGAAGGSADNTSGGGSSCASSGGAGAYVEAIFPATPGQQIPISIGVGGVGVTGKAGGTGGASTFGPFGSFAALSCPGGLGGYAGTQTSSSAASSIPGCPGNGLPSGPNIVYAVAAAGGLPGIAVLGTAAAPPGSNSPMGAGGAGITVYNGGTSQPGGNAGGWGGGGGAHANQQAAQNAGGAGANGVGIIDEFSA
26	2454478..2454765	hypothetical; PP_02640	0.0	MSGTLSTPGPTQICGSFFYDNTATVAAALDLQTALQVAVPQVTAAAQTAEAIAPTLAEALQSANYFLTGDLRGLPTVPGSVGTLWNNGGEIALVQ
27	2454766..2454912	hypothetical; PP_02641	0.0	MKVASIPAAVFDLWCAQGLDPWNMEAKDIVARLRRDNLEAFLATSKEV
28	2454919..2455704	PHAGE_Pseudo_UFV_P2_NC_018850: major capsid protein; PP_02642; phage(gi410491826)	3e-27	VGQNAQVEGASAPAAQFNPTVMRSNTTQIFTKTASVTGSMQATKTYGRGQELAYQLGLRSKELKRDREWAFIGTGQGKAAGADGTAREMAGYQAMIDPSMVYTAGSGLNATGTAPAATALTEQMLLTTQQASYNAGADANTIMVRPSDANTIAGFSASNRTVFVQNQDTTLNHNISIYKSPYGTLKVVMNRFIRGTGASGTPDTTADALLFDPAMWKLVTFRDWFRQTLAVTGDSTNVQILGEFSLKHMNFKGSALITNLA
29	2455705..2456631	PHAGE_Pseudo_DL54_NC_028919: capsid and scaffold protein; PP_02643; phage(gi971755569)	9e-07	MAPEGAATAPVELDATDAFAAHLEASQAPSEVSEEPRRKPPEPEQTDAAEPERAEAPAEDDDPDVELPFGEEIKTYKLKELRSLIEEHGQFSGRFAEAAKASEAATAQKDRLEAAYTEMWKRAEERYAPYKDLDWLAISRDPNVDPETFKQVRADAEAAYKDLAFLHSEVNGRLEEARKAAEDARQEAAKACAAELTDPMKGIKDFPAVYPKLVEFARKSGVEGIENVTDPTMLRLLHKAYLYDTGSKTVDAQVQKVVNKPSRVIKPGSAGSNADASEKDGLNKALKSLRANPTDPDAITAAFMAKLH
30	2456632..2456883	hypothetical; PP_02644	0.0	LIERGAAAKRLLDDTTFCAVVDDLTNYNLSALCAAKPGEAGREAREYHHLLQYALTEICRELQMRHSAGEQMADALHNHEDTY
31	2456884..2458932	PHAGE_Pseudo_LUZ24_NC_010325: portal protein; PP_02645; phage(gi167600438)	4e-61	LAKLTDAAIAAIAQTGIGQSYGYGGSSKLSKERERVSRYYDAEKPGMLHKGDSDYRSMNVYVGIESMKAQLLEVFSGNTRPVVFNTAPGETDMQAKFRTDYVTRVIFSQNSGFQVFQTVIEDALKARNGVCKVYWEASYEDQFYDLSEPSYEQLMAFLMKDPTSSVEEVEKGDEDGTLKRVLVKCKRNRSQVRLRPIPPEEFGISQMATSIEEANLVFHRQSMTKSELIKHGYPKSIIEDLPDDDGMDERLNPEVVQRFGQTGDIIGLSDLDGDTQDARKLYTVYECYMHLDIEGDGTSQLYKVDLCCNQVLDKEPVSHKPFIDFCALPRSHAFYGANYGLLLVPTQNAQTFLTRSIINHSLITTNPRMMVAQGGVTNPRELMENRLGGIVNVRDVISS…
32	2458933..2460528	PHAGE_Shigel_Ss_VASD_NC_028685: hypothetical protein; PP_02646; phage(gi966200475)	5e-39	VAGQDFRVITQDRQALRRRLYDDFEFYARHALKIRTKKSEIVPFIFNEAQRRLSEIVEKQKAATGRVRVIILKSRQQGLSTYVEGRLYFRVSQRKAKKAMVVTHHATATSTLFDMTQRFHELCPEVLKPSTKTASRRELRFGHLDSGYIVATAGGDTVGRGETLTHVHASEVAFWPKSSSREIFSGLMDAVPKTDDTEVYIESTANGMTGVFYEQWQEAVAGRSEFVPVFLPWFIDPSCRVEPVKGFQRTPMEEDEAAKYDLDDWQLMFRRQKIAEKGLDLWKQEYPATPEEAFLTSGRPVFDPLKLDDMRRLIQPPRSRMAYEGGKFVDHSMGELQQFYPITPGENYFIGADVAAGVNGDWSVAQILDPDMRQVGIFRAQVDPDYFAHILAALGRLYN…
33	2460538..2460798	hypothetical; PP_02647	0.0	MIEEGITTDEGAMADVALAAAVEIVITKDTAPPTEHEARPTSRYLYSPRDRLSAIKTVLEFTKTKPVVKTEAQLSVAEAWLDRISE
34	2460799..2461146	hypothetical; PP_02648	0.0	MNKGASGSSQSQDSLQQNSANQPGVVAGLDNINRVRKSKGKAKKTHYGAHAASLAQAAHDNGKPALASAITAVAHAPHPQDKMQVAQNYLATLPPEEAQQHAHMFTKQLMKQPEQ
35	2461147..2463093	PHAGE_Phage_Gifsy_1_NC_010392: bacteriophage side tail fiber protein; Lambda gpSft (gpN) homolog; PP_02649; phage(gi169257214)	2e-05	MAQNPFDQFDAKPASSGGNPFDQFDAPKGGAQAAPHESTLHHWAGLTGRALTNGVTGLADMFSHAGDTDLAQASAIRPELAEVKPTPVSEQAEAALDRAGVAKPNGAGEQLYSGAVSALPGAALGGAAGALARLGTGAASGAASTGAGMLAHAAGASPSQQAAAELLTGLAVPGGLAAGSKAADIRALSKVAPDRAPVTASVISGIDAHHGSTLNSGPWANSAASYVKDGAESLNGLSDALHKNALITAAQRVTIKNAVQQAAAHQNRISTAPGSAYDTISQMQNLPPSVRGTLLSGLDHLDTASSNKLLRNSKGPLEKVGATAGGLIPFFGHHTALGMLDAPPGVVIGGAIGRGLDNKLGLAKAPAQRLNSAAQRVLDITGQQVPESPLSRARAVSAG…
Region 7, total : 7 CDS.
#	CDS_POSITION	BLAST_HIT	E-VALUE	SEQUENCE
1	2461031..2461043	attL ACCCTCAGGACAA	0.0	ACCCTCAGGACAA
2	2463094..2464965	PHAGE_Gordon_Orchid_NC_030915: holin; PP_02650; phage(gi100062)	7e-08	MSYGRQFLAAFDSSGISPKFLPAAYGMLGQESSNGAASPNLLQVTSSTAANPGYGLAPLSDEDRNDPQKSSAFALNLLKAKADHAGLSFDNPDDYASILRLHNGGGDPNYVQHVAARIPSTPPETALSGPAEGTQMSGSMTQPPPGQVAFQGPQPTQDMLDAADPHSSRTLSQMLLRAGAGFAGGRTFGEGLSGALAGAADTLDQQQQAAYELYRQQQLQSLYGLKADTTNANNETKVGVAGARNATSARNTDVRAGVAERGQDIGHGDRQDAINSRQNYQNAALALRGQIANSRGAQAAALTGAPYTPVTIPQNIGQAPAGVPQSPPAPPPPGVPSTPPATPPQPAPLAPPTLPPAPTTDPWALPPLPTQGGIRGAQQFAQKNQGERDRYARDHASAL…
3	2464966..2466339	PHAGE_Cronob_vB_CsaP_GAP52_NC_019402: putative DNA injection protein; PP_02651; phage(gi414087484)	3e-22	LGSSKTKTQSSSTTSPWAPQASQVQNIFGQAQQNYNQQSANGPYTGQMTAGTNGTLDSAIAGANNWANGTGASLSSGQASAGSTGLGALTPYINNASSLASQGLDSGLSGILSGIANGTTSSSGPTSALSSALNNAAISGTNGLTNAQNTLSNVSSQALSDPTAQLAANAGTYMNSSAVNQAIAANDATIDQTLNQTTLPGINRQAAQGGSLNSSRAGAAAAMAQGQAATAKATQAA
4	2466340..2467947	PHAGE_Cronob_vB_CsaP_GAP52_NC_019402: hypothetical protein; PP_02652; phage(gi414087482)	5e-57	MALVQFRGLSGAGIVSDPNPAELGLNAWSSGANVRFHANKAERAPVLKTAVPLTAAPSYVFSYRPASLNDMIISVSTSAITHVSSGDAVDLTPEAGASYSPGAAFTSTALGDVTYLNQPSAVPLYFGPQSGRFETLPGWDPSWSCRSLRNYGDYMIALGVTKGAQSVPQMFKWSDLTLAGQPPGSWDANDATTNAGENVIEDLTSPIVDGCALKDAFVVYASDQAILVTQTGDQLVFAFTRLGIDGGLIAPNCVVEVAGGHYCFGTSDIYFHDGTTQRSICDGVSRDFIFGTLNRKLAEACFTIYSPVHKEILFCYATTDPAAPWSGLGCNRAAVYSLTSQTWSYLDLPNVCSGSLVSVDQSPTYARYDSDGPTYATTSDTYLGLDGSHSDNVIFGSAS…
5	2467948..2468070	hypothetical; PP_02653	0.0	MLRYRDPVMYAMLFGVEGDRELEVTVKALLEAAEMKPEGK
6	2468071..2468865	PHAGE_Bacter_Lily_NC_028841: antirepressor; PP_02654; phage(gi971748300)	9e-29	MINLQAYEGHEDGGSRAMTFPFEGHSVRVMDRDGEPWWFLADVCAALDIAKPENVAARLDDDEKATTRIEGGGNLNPNRTIINQSGLFSLVLTSRKPDAKRFKKWVTAEVLPAIRKTGGYMVAAPDETPEALALRALTVLQDTVERQKAQLAISEPKAAGFDQITAGNYLPSIRKFFSVFDGVNLIAVPARLVELGYLYRDPQDNYRVRRERPRALELFREHIQQNSAWTSVTISLRAAGQEEMAELYRQGQIPLLKAFQQRLQ
7	2468672..2468684	attR ACCCTCAGGACAA	0.0	ACCCTCAGGACAA
8	2468866..2468997	hypothetical; PP_02655	0.0	VGDLWAADLMVDTGIVWASVEPSMQEAFIALAGATTALLRTGH
9	2468998..2470098	PHAGE_Pseudo_PMG1_NC_016765: integrase; PP_02656; phage(gi374531680)	4e-15	MRAARKAATEIIQKFAEDARPASEKVQGVTIEAALRRYLSWLETERKASSRHAGIHVRKTLGEGFEGRFSLDGRRLLVSLTPADMDEMVRARIAEGNSPQTAAHEVKTLRAAANYVADLGGEFPPAMVSRSGRANPWRLPQVKAKTRYLTREEWQSVYDHLDPFRSTSAVYKNGAQHDLHPSPATVQSRLDIRDLFVILTVTGGRWSEVARLTWDRVDTVEFRHVRFWGSKSNRERVAPLPASASDILRRRYEARETVMVFPGGGGKRFRTDASGRPIIAAMDACGLNREDIVACHGRATVHSLRHTYASWLLQNGADLAEVQEGLGHTTLDMTRRYAHLSQSRTAQRITAVFDALADVKPLGHDA
Asaia platycodi JCM 25414
Genome; Raw sequence .3150973, GC%: 59.29%, length = 3150973 bps
Total : 3 prophage regions have been identified, of which 0 regions are intact, 3 regions are incomplete, 0 regions are questionable.
REGION	REGION_LENGTH	COMPLETENESS	SCORE	#CDS	REGION_POSITION	POSSIBLE PHAGE	GC_PERCENTAGE	DETAIL
1	8.6Kb	incomplete	30	10	86594-95209	PHAGE_Xantho_phiL7_NC_012742, ......	63.63%	Detail
2	12.3Kb	incomplete	60	15	1338747-1351106	PHAGE_Rhodof_P26218_NC_029061, ......	58.60%	Detail
3	9.7Kb	incomplete	10	10	1804183-1813963	PHAGE_Sphing_PAU_NC_019521, ......	59.71%	Detail
Region 1, total : 10 CDS.
#	CDS_POSITION	BLAST_HIT	E-VALUE	SEQUENCE
1	complement(86594..88471)	PHAGE_Xantho_phiL7_NC_012742: P06; PP_00115; phage(gi238695593)	3e-57	MSDYEQAARELKAATDEVKRFAEASTAELKNLGRVTEETKASADKALAEMNGLSARLADIEQKTARRSGDAESRPLSLGEEFMASEAARDLKSSFQGRVRTEMERKALTTGPATMGATTSAGTSLIPAMRLPGIDMIRLPQPTLRSLIPSGATSSPIIEFVRQKSFSNKATPVAEGAAKPYSDMSFELSRANVAVIAHLFKASKQALDDAPELVSIINAQGVAGLEQVEEYQFMYGDGTGANILGLMKQATAFAAPAGLAVPDAALDTIRMAMLQASLSLYPATGIVLHEIDWFRITSVKDGIGRYVLGDPQSVATRSLWGLPVVVSNTIRQGDFWWVPLPPVRRFSTGSLSRSRLPLWVTISRRTWSPFVSKNVPASSFIVSNPSSPVPFRRMPRRQR…
2	complement(88550..89176)	PHAGE_Azospi_Cd_NC_010355: phage head maturation protease; PP_00116; phage(gi168495135)	2e-21	MSEYLAAPFEWKFAPNAPEGSFEGYGSVFGHKDAHGDIVLPGAFAETLAERKAQGRSIPMHVMHGILGGDGLPVGVWDDASEDAHGLHLRGRLSGMDTDYGRRLYGLVKDGALGGLSIGFSLRKNGATFGTDPKGSRRQIKAVNLHEVSLVDDPSNALARVFEMRRRFYPAAAASRADCRNTRCQPGIERGNARQIHPADPRGASRSG
3	complement(89294..90061)	PHAGE_Xantho_phiL7_NC_012742: P04; PP_00118; phage(gi238695591)	5e-50	MTVQRAPNTGALVYRYSYQGKTLVLDEGDIFHIKGFCFDGLMGISPLTAGRQSIGAALAAEETAGRMFRNGLLSQTYISAPTYLTIPQKEQAKTILADYSGAMNAGKTPLLEGGWKVESIGLKAEDLQLLQTRQLGVATLCRWFGVQPAMIGAMEKSTAWGTGLEQMNLWFLQYGLMPWLQRIEQAVSRCLLAPAERDRYFARFNVDALMRGDSTARASYMQSALRSGWMTVNEARANDNLAPMPGGEVLMVQAR
4	complement(90058..90498)	PHAGE_Psychr_Psymv2_NC_023734: phage portal protein, HK97 family; PP_00117; phage(gi593779762)	1e-20	MSIATRLRGMAYKAASAAFQSLTGVSLTDLRLGAFMAGGPSIAGQSVSVDTALQLDTVWACIRLLSETIGSMPLKLHEQQGDGQSSLARDHPLYRVLARAPNADMTPIEFWSCMAACCLAWGNGFARSCGVVTGRLWRSTRCGPTA
5	complement(90495..92042)	PHAGE_Xantho_phiL7_NC_012742: P03; PP_00119; phage(gi238695590)	3e-111	MAEACGDWFREILSALFGALDPNTGARAIQELFLLVPKKNSKTTNGAGLMLTAVIVNERPNAEFLIVAPTKEIADLAFSQALGMVQNDRTLMQRFHAQTHLKRLTFRTTGATLQVKAFSPDVMTGVKPAGVLVDEQHVIAMRNDAGSVMRQIRGGMISQPEAFLAIITTQSDGPPRGVFAQDLIRAREIRDGKRFQPVLPVLYELPPDIQQPSKLPGEAAPWEDPAYWPMVLPNLGRSITLDRLKREYEDAREKGVGELASWASQHLNVEIGLALRSDRWVGADYWQGAGDDTLTLEALIERCEVIVAGIDGGGLDDLLSLAVLGRDRITGQWLHWQKSWVFEGVLALRKREASQLRDFETQGDLVITAEPGTDIDQLVAVLGTIDQSNKLAIVGLDPM…
6	complement(92197..92478)	hypothetical protein B932_0347 [Gluconobacter oxydans H24]. gi|414341366|ref|YP_006982887.1|; PP_00120	1e-15	LLRPRRSDVRRFRYALGASVAAHALFIGFLLVRLPMSKPPEPPEPPPIEMAFEDSGPPATPHKALAAPRDDQPALPGLDSGWGDDLPPINRRN
7	complement(92496..92924)	exbD/TolR family protein [Gluconobacter oxydans H24]. gi|414341367|ref|YP_006982888.1|; PP_00121	1e-59	MSAGGGPARGRRRRPASEINVTPLVDVMLVLLIIFMVTAPMMTSGVNVDLPKTDASPLNADTKPITVSIKADGGIFLGEDPVSADQLVAQLQQAAQNDKEHRIFVRADAHINYGQVMDIMGKITSGGFTHVALLAQQPAAGQ
8	complement(92936..93589)	MotA/TolQ/ExbB proton channel family protein [Gluconobacter oxydans H24]. gi|414341368|ref|YP_006982889.1|; PP_00122	8e-105	LFLHASIVVQLVMLGLILCSAFVWAVIIEKIILMRRVNREATEFEDRFWSGGSLEDLYDSDGAKPLHPMAAVFGAAMGEWRRSARITGIDLARGGVRDRVDRAINITVTREMDRLSRRVVALATIGPVAPFVGLFGTVWGIMHAFGSIAAMHNTNLAVVAPGISEALFATAIGLVTAIPAYVAYNVTSGALDHFAERMDAFGTEFAAILSRQSEERS
9	complement(93751..94164)	4-hydroxybenzoyl-CoA thioesterase [Acetobacter pasteurianus IFO 3283-12]. gi|384043585|ref|YP_005482329.1|; PP_00123	3e-36	MKAHRIGFRVYYEDTDAGGIVYHARYLAFAERARTEALRMAGTPVSALQEETGLVFVVTKLGIEYHAPLRLDDWAEITTTIDSVGAARCQLRQVVTCGDMQAATLTVELACIMQNSGRPARIPPRWRASLMTLSNQS
10	complement(94151..95209)	PHAGE_Bacill_SP_15_NC_031245: hypothetical protein; PP_00124; phage(gi100221)	4e-08	MSETDRGALNPERRMDDSDHGLRPQTLDDFTGQRASCENLSVFIQAARSRGEALDHVLLHGPPGLGKTTLAQIVARELGVGFRATSGPVIQRAGDLAAILTNLQPNDVLFIDEIHRLQPAIEEVLYPAMEDFQLDLIIGEGPAARSVRIDLAPFTLVAATTRAGLLATPLRDRFGIPLRLVFYTPEELRSIVSRGALKLGMNLTEEGAEEIARRSRGTPRIAGRLLRRVRDFAAVGAPEGRAITRHMADAALSRLEVDSVGLDAMDRRYLLRIAEHHHGGPVGVETLAAALAEARDTLEDVIEPYLIQEGLVLRTSRGRMLGERGWAHLGMKAPASASAAQFDLLRESDEGA
Region 2, total : 15 CDS.
#	CDS_POSITION	BLAST_HIT	E-VALUE	SEQUENCE
1	complement(1338747..1340228)	PHAGE_Rhodof_P26218_NC_029061: hypothetical protein; PP_01671; phage(gi985757624)	4e-58	VGSSDGSLMTRINLTGGSYSARFVSVAAQRCLNLYPEPLPQSGQEPVPYGHYPTPGLVSVASPGGTGRCAYQTTQGDVIFVMGKSVILFGRDMSVATIGTITSNSGPVRMSDNGTALFIVDGGVGDGWYCSMPTKAGAGGYGTLAKIVDPAFYGSRTIAILDTFFLFVNPNTTNWYTSPAQFEDEATTPFDSLYVASDSTSLATIEAIEVVGQYIWLFSRNQVELWYDSGAADFPFQRVQGVTVEAGCVAAFSVAKLPSSASTPNGGVMWLSQDRAGQGRVYLGQLTAAVPVSSYPVENALQSMGDLYGAVASVYQQGGHVFYVLTIPGQTSAWVYDLSTALWHERCALDAQGNEAQIRPIFWCSAYGSTWACDRDNGTIYEVSLAATDDAGTPIKRQR…
2	complement(1340204..1341253)	PHAGE_Burkho_BcepMigl_NC_019917: pectin lyase-like protein; PP_01672; phage(gi431809915)	7e-11	VRRTNVDRSEVDGKLGTHGTWFSISDPAINPLQVRFGAVVIDSIAFAQSHPAPSATYPTAWQPTTYQPVIQVLGATGVSLRNIFLDGVYAGIFADGSGRLTLDNIYGQVFNKGIVVQHSLDSDHYGHIHFWPYWSSNPNVLAYTATNLVTFLTGRVDTAFLTDMFTYSANVGLELAEDTATSSYSGSIGPTTKFRAHTVSCDGTRYCVAVAGTGVTAHIDSINEQGQDFAASVGGQSLASLTASQALHIASGQAVLQIGDIQAQFIQQSSLGSTSTTGCSYIKIGSLFVDWKYSASNPYYVDAVQCAGTSAYNTFLFSTPPFGQNSTGTVTGQTSNGGASLMWAAVTAH
3	complement(1341975..1342628)	PHAGE_Rhodof_P26218_NC_029061: hypothetical protein; PP_01673; phage(gi985757625)	2e-07	MSGSQTSAGAQNGTPGTSGYLVSDLVGLALRQIGVGTLGTAPSAADISDGVMHLNMLLAKWQQEKFLVPNLVDIPLMSTGTSVYYVGPGGDFDVANRPARIEAAYVRLATSPGFQQSDLGEFAPTDFSGSDFDTPNDGLGASGNQSRLISLWRSFPRMKSMPQSVSKGCEHGRVQSIIPHHSLRGSCASSQFRRVRCGSCTSLSRISLRIRCKHPTR
4	complement(1342628..1342942)	hypothetical; PP_01674	0.0	MPDAEATAFAGYPISRFHPVHGRREFASPNDYALAGGDDGDWRFTSAGGADQARTHTEALLVIRMNEDRALEALKAEGNVVSNSVQADESARSGYPEPGVVTQG
5	complement(1342942..1343133)	hypothetical; PP_01675	0.0	MANPRYPRDLSHPNGFRTVTVYSPEEEREVNIAFAAARAENAAAHAAAVDGKKIAPSRNREGV
6	complement(1343146..1344417)	PHAGE_Rhodof_P26218_NC_029061: coat protein; PP_01676; phage(gi985757629)	8e-42	VANSLLTIKMITREALRVFRNTNSFPKNVDTQYDSYYARSSAKIGQTLNIRLPNDYVVGSGPTITPQSTNERQTSLSITNQFNVAMSFSSADRALSLDDFSKRIITPAVNRLAGQVARTLMSTVDAATMGGQGPAQHFVHNTDASNNTISPTAATVLQAGAILTNNGVPEGIRRVAMVDPMTEARLVNGFTGLFNPQAKIGDQYETGLLSKNTLGFDWYRDQTIIKHATGNLAGVTVNGAGQTGTVLAVSVGSGGALTLNPGDVFTIAGVFGVNFTTGDSTGTARQFTYNGTTPLTIAAGASGSVPIYPGIVPTGAGAGSQVAYGTVTTSPAAGAALTLANVAGETYRSNLLYVPEAFTMATADLPMDSQQGVEMHREAWDGVSMRMAQQYNIMTDQFI…
7	complement(1344592..1345404)	PHAGE_Entero_HK633_NC_019719: hypothetical protein; PP_01677; phage(gi428782562)	3e-05	MSETLTAPADTAGDAETDDRFAGMEFETDRQERESALPQDDAGQSEEEKQDEQSSGQKNTGTPARLQKKFDRMTFELREAERQAAAAREEAEPEPAPRTERQIEQETRGRVERESHEAREIETFNQTARTLAEAVGAAYGNDAITASTHTLEREVGLDFSNAEHRQLVTDIAELPNAAAVYRGLADDLDKADEIFNAAPRRQYAMLQEFARSLDKAAPPPAPAQRAMPAPVSQAPRPVARPPASARASSRTGYEDESSMEDFVAAREKRR
8	complement(1345401..1346510)	PHAGE_Rhodof_P26218_NC_029061: portal protein; PP_01678; phage(gi985757631)	1e-24	MGLANVSPPGVLISNSKDPDTGSDIAGAPTPVPPPQLSPGYLQAMQTSEQQMGMASGQYQAEFGQQSNEASGRAIGERQRQSDTATYHFTDNQGMALRRIGAMLIFAIPRVYDVTRAVQVLGVDGTMTQAVIDPGLAQAHQQMTPDGPVQSDPSAQAEAERAVKGAILAVNPKIGKYAVVADVGPSWASQTQETFNALMQVVQASPGLIAQCGDLLFRSAPFPLASEIADRLKPAADNPQAQALQQQLQQAGQVIEQLKKKIADKDRDFALRSDKQKHDQVIDLMNADAKTREQQTDEMAAIGSIAPMELLPVLRGLVRRILSEQGVPDAPIPPEDPEPMGAELPRMPSTNPPGGLIHAPDPVNGAVDV
9	complement(1346474..1347613)	PHAGE_Rhodof_P26218_NC_029061: portal protein; PP_01679; phage(gi985757631)	7e-44	MTQKDSDILTKVVERHRRSVDVEASARSNYQSDLRFLYGDARNQSQWDAATVMGRTSTGRPCLTVNKTLQHVLQVTNASRQQTMGVKVRATGYGASQMAAELLEGVIRHIEAQSNAQQIAYANAIMGQVGGGIGYVHLTTDYVRDADTFDQDIFIEPVIDPLCVVLDPDATQLDKSDANWGMIIEAIPRSEWDLAYPREKDLDNTAPFDGVGEFGEDWEGKDTVRVARYYRRSEVEDTLWNVPPIPDLQVAGGPMRESVMPEELLDLCREIGAQSRTVTDHSVEWFLIGGSRVVDKGDTVFNQIPIVPFVGIEVTIDGNLDRKGLTRFLLDPQAMFNYSASKFIEGLAAQTLGSWQATDAMVAGRENEWAWLTSRRLAC
10	complement(1347664..1348266)	PHAGE_Rhodof_P26218_NC_029061: terminase large subunit; PP_01680; phage(gi985757633)	5e-38	MDAIKGGEQTRLCRVPYDPSVPVYVSWDLGIADSMAFWCAQIVGREIHLIDYYEASGEAISYYCEWLDGRGYRYAEDLFPHDARARELGTGKTREEIARANGRKVRIVPHIGVDDGINAVRLFLARCWFDEDRCKRGVECLTNYRREWNDKLAQFKASPVHDWASHGSDAFRYLAVGLRERTKIAPQQPARAPVSNWMAR
11	complement(1348295..1349083)	PHAGE_Punice_HMO_2011_NC_021864: phage terminase large subunit; PP_01681; phage(gi526244987)	7e-45	VTNVVWSPTDRQQVFLAAEEEEVLYGGAAGGGKTDAFIVDALGLWQSAPLVPRYKALILRRSYQQLREVIDRARALYPTIQGLEGVTWNEQKHEFRFPSGAKVIMGYAERDADVFQFQGEEFQWIGVEELTQYPSDFVWTYLRSRLRGTNLKRLMRANCNPGGIGSKWVQQYWSIPDDGRDTCLASSVEIEGQTITARRRFIGARVTDNPYIDVKYRANLATMPEMQRRALLDGRWEMGDGRWEMGDGRWEMGDGRWEMGCA
12	complement(1349080..1349454)	bacteriophage protein [Azorhizobium caulinodans ORS 571]. gi|158422461|ref|YP_001523753.1|; PP_01682	6e-19	MVFLYIGRGFCDNRGMPKPTNPADATAPKQRKAALGRPFQRGQSGNPAGRPKGTRNKLSENFIAALYADFEENGIQAIQDMRVERPGDYVKVVASLIPAQFQQVDEDGKVQTLGVIALPVKGSK
13	1350062..1350175	hypothetical; PP_01683	0.0	VQKEAHRMTINKSFIPKHQSSLGVNARCVPQGFRLHL
14	complement(1350241..1350699)	PHAGE_Sinorh_phiLM21_NC_029046: DnaB replicative DNA helicase; PP_01684; phage(gi981221066)	1e-18	VKRSGNRTAEVTEISRDVASMARELNVPVIALSQLNRQSENREDRRPFLADIRDSGAIEQDARGVMALYREEMALRLLVGADGQVSRNSGESDAAYEKRAAEMTERLAKSAGTAEVIVLKNRGGRTGIVGMQFDGPSTWFRGDDERQNSAAW
15	complement(1350696..1351106)	PHAGE_Mycoba_PegLeg_NC_021299: DnaB-like helicase; PP_01685; phage(gi508177926)	1e-12	VYVVAARPRVGKSSLMLGLAMRAAQTSGRGLIWSGEMSTEELMSKAVAGKTGLPVDVVMTGHWKFPNGERRPVSREDMDRIVSAGMAAHDIPMMVDDREGATVQQILTRAPRMKRQKQGLAFIALDYLQLMEPVRP
Region 3, total : 10 CDS.
#	CDS_POSITION	BLAST_HIT	E-VALUE	SEQUENCE
1	1804183..1805904	PHAGE_Mycoba_Minerva_NC_026584: FtsK; PP_02241; phage(gi764159392)	1e-21	MRGVQRIAQAQEDVNLALLSRWFSPANASPRLRSQFHDRLTELGGFVLLALALALGVALWSYNPQDPSFDTATTAVPTNLLGQPGATLADGLVQWLGLASALPIIVMLCWAWQIVRHHALSVPILRFVAFLCLLPVAAALIATLQVLMPVLTTSWPSRAGLGGQLGLVLADHLVATGRATLGRAGGVLFSLLGLLLTVLLVPLAVGLRRSEWRALFSGARSVGKGSEHLARRMGNSARQTTPPDWSSYEPVEANAYRHEHPYPSPRQTSETSRQPFIPANTGWLQPPEKNEEALPALANAQTQTAHAQKPQTRPQTVPVTEPPTPANPYAMQLAQISRDQESGPRPAAVTRYAEIEDSAPYAEEPPTRPQPQEEPKRGFFGFGRARAERPSQEQPAAAA…
2	1805901..1806923	PHAGE_Mycoba_Courthouse_NC_023690: gp201; PP_02242; phage(gi593774477)	2e-51	MILSLLYRLTPEECRLIMIDPKILELSIYDGIPHLLTPVVTEPNKAVAALKWTVREMDKRYRSMAHLQVRNITGYNQRVRQVRSTGELVTRRVQTGFDPETGQPVFDEQQLALETMPHIVVVIDEMADLMMVAGKEIEAAVQRLAQKARAAGIHVIMATQRPSVDVITGTIKANFPTRISFQVISKFDSRTILGEQGSEQLLGQGDMLYMQGAARITRVHGPFVTDSEVEDVVADLRSKGEPIYNDEVISNLEDEGGSASSSGNGMSGGGYDAEASLFDQAVDLVTREGKASTSFIQRHLSIGYNRAAKIIEQMEKEGIVSAANHVGKREVLARRQRDED
3	1806937..1807593	pseudouridine synthase [Gluconacetobacter diazotrophicus PA1 5]. gi|209544152|ref|YP_002276381.1|; PP_02243	1e-59	MTPFPYPILYQSPRLVVIDKPAGLPVHPGPKTTHSVEALFPLLSRRKDGPWLVHRLDADTSGCLMIALRKQALVEAQALFAAGLVRKTYWAVVGKAPKENEGIIDAPLRKVTTKEGWRMAPHVEGQKAVTAWHVVSRSQGRALMELTLLTGRTHQARVHCAVLGCPIIGDERYGGSTGSLHLMSRSLEATLTTEQIAARAEPSENFRRTCHDFGLALP
4	complement(1807566..1808585)	glycosyltransferase [Gluconobacter oxydans H24]. gi|414342089|ref|YP_006983610.1|; PP_02244	8e-76	VTGQIKTISAAPRLYAVGGRDTKRAASVPPVAILLSVYNGEAFLNQQLDSFLAQSDTNWCLYWRDDGSQDASRAIMLSFQEHRGQGRCIEIDTEPGNIGVARSYALLLDAAPHEALIAFADQDDVWVPQKLAWARKKILGLSGPALYCARQFLTDEKLAVKGPSLPLRRKTDFHAALIQNIATGHTILLNPEAAALIRPVLPPEGVLHDWWSYALVLGAGGEIVFDERCVSLYRQHRRNVVGVERSVVVRGMRALRRGPTAFMALLVALTARLQDADCARALTPEARAFLSRVQSTLGGGFMTRLRFLLAERGFIRQRPAETWLFRFWFLFYGSARPKS
5	complement(1808588..1809490)	PHAGE_Escher_phAPEC8_NC_020079: putative dTDP-4-dehydrorhamnose reductase; PP_02245; phage(gi448260370)	9e-30	MSTSTEKRILVTGGQGQLATSLKRLGGDRVVVVGRPEFDLAQPETLAATLERVNPSLVVNAAAWTAVDLAESEVEGATAANETGPAELARLCAASNTPLIHVSTDYVYAGDKGTPYVETDPVTPQTVYGRTKAAGEQAVLKAQPRSIVLRTSWVYSGHCKNFVRTMVNAGAKNTHLKVVGDQYGNPTSADDLAKAILSIADQVEAGWQDRFAGLFHASGTGETSWHGLAVAALEEAARHGQTMPVEIAAIRTQDWPTPAKRPQDSRLDCSKLEQVFGIRLPEWRDSVARAVDEHFATKPA
6	complement(1809490..1810047)	PHAGE_Entero_phi92_NC_023693: Phi92_gp065; PP_02246; phage(gi726646998)	7e-39	MKVERLAIPDVILVTPQRFSDSRGFFSETYNHQKMVDAGIDLTFVQDNQSLSVQKGVLRGLHSQVAPFVQGKLVRCTKGAIWDVAIDARTGSPTYGKWVAAELSEENWSQLWVPPGFLHGFVTLQENTEVQYKCTSLYDKASERAVIWNCPHLAIDWPISESEVVLSDKDKVAPHFTEAKGWFQY
7	complement(1810059..1810967)	PHAGE_Escher_phAPEC8_NC_020079: putative glucose-1-phosphate thymidylyltransferase; PP_02247; phage(gi448260372)	8e-85	MSAEKTKPMKGILLAGGSGTRLHPMTLATSKQLLPVYDKPMIYYPLTTLMLAGIQDIMIISTPHDLPQFKRLLGDGSQFGVRFEYREQPSPDGLAQAFLIAEDWIDGAPCALALGDNLIFADHLSVLLRAAAARPEGATVFAYQVRDPERYGVVSFDESGRAQRIIEKPSEPESTWAVTGLYFYDHRVVEFAKKVKPSPRGELEITDLNQMYLEEGSLQVDRLGRGCAWLDAGMPDSLMQAGLFVQTIQSRQGMLVGSPTEVAYRMGFIDRDQLIVQGNAKKKTELGRMLLELAHQTQSGRN
8	complement(1810964..1811512)	PHAGE_Entero_phi92_NC_023693: Phi92_gp067; PP_02248; phage(gi726647000)	3e-51	VRAWYHTYGLPTFVTNTTNNYGVWHFPEKLIPLVTINALEGKELPVYGKGENIRDWLFVEDHAEALVKAVERGQPGETYAIGARQPRTNLEVVKAICTVLDELSPDPAGPRERLIRFVTDRPGHDFRYEIDPSHAEKALDWKAKHDFETGIRRTVQWYLDNRHWWEGIRSRRYTGQRLGTKA
9	complement(1811470..1812006)	PHAGE_Escher_phAPEC8_NC_020079: putative dTDP-glucose 4,6-dehydratase; PP_02249; phage(gi448260373)	4e-20	LTGGCGFIGSAVVRHLIRQTSHEVLNVDCMTYAASEETVGEVAADPRYHHAAVNIINGVELQKLFDEYRPDAVMHLAAESHVDRSIDGPGVFVETNVTGTYALLEPLAATGSRLMPMPRKHSVSIISQPMKCSAISNSMIRHSPRRRRMIRAARIRRRRRLRIIWCALGIIPMACPLS
10	complement(1812566..1813963)	PHAGE_Pyroba_virus_NC_005872: hypothetical protein; PP_02250; phage(gi47131172)	2e-05	MSLTSSSPDKISPDELTSQEPAPEVDLKATRPARFVHGSIMRHVVVMAGTGAIGLMAVFAVDLLNFWYISHLHDPALTAAIGFAAALGYVQVAVSIGMTIGLGAIIGRLIGARRVIRARRFASAFMVVMVAVTAVLGCLTAVLASFLLTLLGARGEALVQAVGFLHLVSPFLPLVCYGMAQSALLRCVGDARRSMQVTLVGALVSAILDPILIFGFHMGLTGAAISTIASRGTVVAFGFFSLRGHRMLEWPRLWAIAPATRQIGGVALPAIATNLATPIGGLFTTHFMSRFGLEAISGQATIDRIVPVAFAFVFALTGSVGPIMSQNLGAGKKDRVRETLYASLKLTALCVVLTWAILAAFHTPILHLFASKGVAIRIVTLFCCWLVASYFFVGLLFVS…
Asaia platycodi SF2.1
Genome; Raw sequence .3420650, GC%: 59.89%, length = 3420650 bps
Total : 2 prophage regions have been identified, of which 0 regions are intact, 2 regions are incomplete, 0 regions are questionable.
REGION	REGION_LENGTH	COMPLETENESS	SCORE	#CDS	REGION_POSITION	POSSIBLE PHAGE	GC_PERCENTAGE	DETAIL
1	16.6Kb	incomplete	30	18	1616424-1633072	PHAGE_Pseudo_MD8_NC_031091, ......	59.60%	Detail
2	14.3Kb	incomplete	50	16	1644629-1659008	PHAGE_Salmon_SEN34_NC_028699, ......	59.35%	Detail
Region 1, total : 18 CDS.
#	CDS_POSITION	BLAST_HIT	E-VALUE	SEQUENCE
1	1616424..1616438	attL GGGCTGCGGGTATCA	0.0	GGGCTGCGGGTATCA
2	1625454..1625831	PHAGE_Strept_phiSASD1_NC_014229: gp4; PP_01533; phage(gi298103512)	7e-06	MAVDLRLPYDPQNIFAKILRGEIPVKPIYEDDFALAFPDIAPQAPVHVLIIPKGQYVSAQDFGLHASAAEIAGFARAISKVAEALDVTETGYRLISNAGGDAGQEVPHYHVHLLAGEKLSAKLVR
3	1625889..1625964	tRNA	0.0	GTCCCATTCGTCTAGAGGCCTAGGACACCGCCCTCTCACGGCGGCAACAGGGGTTCGAATCCCCTATGGGACGCCA
4	complement(1626023..1626853)	PHAGE_Salmon_SEN22_NC_028696: integrase; PP_01534; phage(gi966201337)	5e-13	MGKVEAMKRLIECTVPLKEKMGHLRVDQVGQRQWNEYASTRVRKPNPRRKSLDGYEPQPVSPGTLRREFNVMRAALRQSWKDGNLTKPPVLEVPRDSAPRDRFLTKQEARRLLDACETPHVRIFLALAMFTGARKGSILALTWDRVHFDSGRVDFQEPGRSLTVKRRAVVPMAPALRKELEEASRLRTCDFVVEWNSKRVTYGLRWSFKRLCERAGLTWMPTPHHFKHSVASWMAMNKVPIDQAADWLATDPKTLWNVYRKFDPSYLEEVTSTFDL
5	complement(1626934..1627242)	hypothetical; PP_01535	0.0	MGEGMPRLLTVNAAASIVGYHPETLRKAIREGRLEAYRRPRGTRIEPDALKAYMDLYLCPASDQTDHFSSYTGARTALSGGKAARDGAPRRAMRMNAALDRH
6	complement(1627235..1627492)	hypothetical; PP_01536	0.0	MTDPTPFNRLLGERVRRMIVAQGRSQESVAVEAGISTSTLGFLIKGQNSTINTVLSVFAALKAPPEVMAGIYADFVEHWKERADG
7	complement(1627485..1627628)	PHAGE_Gordon_Nymphadora_NC_031061: DNA polymerase III subunit epsilon; PP_01538; phage(gi100067)	5e-10	MIFKWNEHEIAVGRILDLTPERPLFGNRCGKTAKSHWLVFMKGAPHD
8	1627605..1627841	hypothetical; PP_01537	0.0	MLIPLENHRTSRLQHSETLSKPGTQVVLPSLPELPIFLRKPSGLAVPHEMRRVEYNQIERTVSEGQIAKIHLCIWRND
9	complement(1627984..1628346)	hypothetical; PP_01539	0.0	MIIEPTAYHHKLLNDETALIVSERLTLSPRFPVHIGDSDNREGLSRETEPLVPLAKALDYAAALVAAERIKTANAFEEFVKHLARDWGRFLSGDGPVIMESIATRVEREAAAIREGGEHG
10	complement(1628343..1628873)	PHAGE_Salmon_SEN22_NC_028696: hypothetical protein; PP_01540; phage(gi966201341)	5e-06	MTHEQKPESAEFRTREAQVARMCQLFHFPDADALNVTSASIITRNILEAEARGAAEQRRKDEPEFEKIIAERDEAEDFIRKMAETVLGEEVEWSNVYGFQNALNDVSERIFFLEKDTANVTALEARVKELEGENKAWSDAAANALTWLENGRQANARDELKAAQRRAAALSEGDQL
11	complement(1628870..1629013)	hypothetical; PP_01541	0.0	MTDPGDEEIADRLTREQAAQDAIRDRIAAQEQAQEAVKGRSAGERRG
12	complement(1629010..1629600)	PHAGE_Vibrio_VvAW1_NC_020488: exonuclease; PP_01542; phage(gi460042915)	2e-29	VSILFFDTETTGLPNYGLPTNHEDQPHVVQLAAILTDDRGEEQAQLSVIIKPDGWVIPEGAARVHGITTEKASRYGIREVVAAGAMYDLCCAADTIVAHNIKFDRQIVGTMFARAGRGWKLPERQACTMMNASPIVNLPPTERMIAAGYGDKPKAPSLAECIRHFYGEELDGAHDALVDVRACKRIYFEMLEQVCA
13	complement(1629597..1630238)	PHAGE_Salmon_SEN22_NC_028696: hypothetical protein; PP_01543; phage(gi966201344)	6e-30	MVDLSKTIIAKSDQLNADDLLGGPITVTIQAVKEGNTDQPIAIFYKDCNGKPFYPCKSMRRVLVNVWGKDGADYVGKSMTLFRDAAVKFGGIMVGGIRISHMSGLEKDMPMALQVTKGSKKLYTVKPLKVEAAEPKAEQAAPRRMTPAQFVDQRIQRINACETIEALEAETGSDSYKATLARLENASPDDRIRLVQAAAQRAEALSFVREEMA
14	complement(1630238..1630921)	PHAGE_Gordon_Lucky10_NC_031267: tail tape measure protein; PP_01544; phage(gi100049)	9e-32	VKIYRDLEQGSDEWLQARCGIITASIIGKILTSTGKAAKNDHSRRVVSDLLAQRITGLADPSMSSRTLERGHEDEMEAKLKYSQEIAPVEEVGFITEDFGGVIIGYSPDGLVGDDGLIECKSRLSGLQLRTIISLEVPSEYMAQIQTGLMVTGRKWLDFISYPAMGGGKMMVMRVYPDPEFQAVLLDAAREAETEIRRQHAEYENAIKSNKARFFDTERREELEIIL
15	complement(1630918..1631163)	hypothetical; PP_01545	0.0	MKFTLLDDEQSQANARLIATSPELAEALKELYADARELLVSATSCADREALNADDLEERGFAPDSFAKARAALAKAKGEGA
16	complement(1631256..1631432)	hypothetical; PP_01547	0.0	MTPAQHDLAKANAILKHLRNEAWGLDATPLRKSLIQQWEAQRVAADRRMISELWGERS
17	complement(1631429..1631638)	hypothetical; PP_01546	0.0	VMKHERITVWQDDIVLPLDLLKGARDVLARAADRLEALAKDDQDWEVLRELDEQQFMLGKRCDEREAAQ
18	complement(1631635..1631913)	hypothetical; PP_01548	0.0	MAYPDGMQFQSSDTRSPYYRASAMSNYQAAVSQDAEIAEEIRELITRTEQQVNAKLSRVNDRGAFDTDELDCLFCRLGEALPNRAVLEQRAG
19	1631864..1631878	attR GGGCTGCGGGTATCA	0.0	GGGCTGCGGGTATCA
20	complement(1631994..1632185)	hypothetical; PP_01549	0.0	MSDDRKDYEFDHAFFVSSRNTWRDVGIDRARQTHEYLTDLVESSDAIGQFTVSEIIEYLDRYL
21	complement(1632185..1633072)	PHAGE_Pseudo_MD8_NC_031091: hypothetical protein; PP_01550; phage(gi100053)	7e-22	MANDPTITDAFSALTMSSREIAELTGKRHDHVIRDIKTMLVGVYGAEEVERRIPDHKRNRHSEFIRENADSILSAIQEGFGGSPNWGADQEHPFKWERNTRGMISIIHLDRSLTYTLVTGYDVEKRKKIIDRWLQLEAAASAPIASHDFYVPQTKAEALRLAADLTEQVEEQRQRLEVTEPKAEALDQMSAMNAEPMGVRDVGRHLEIGQTKVADLVVQWGWACRESNKLKPTHYGREQGYTVLTSRIFTNKITHEEHVVLDFKMTRKGINRMAVRLAQEARRKPRLIAEAQGAK
Region 2, total : 16 CDS.
#	CDS_POSITION	BLAST_HIT	E-VALUE	SEQUENCE
1	1644629..1645927	PHAGE_Strept_mu1/6_NC_007967: terminase large subunit; PP_01573; phage(gi93007440)	1e-36	MAFRLNPGQAEANKLLASPATHILLRGGSRSGKTFVLIRAMAMRAMRVPGTRHGVFRHRFNALKHSVIFDTFPKVMSLCFPGAPYSLNKTDWFVTFPNGSEILFHGLDSSDRTEKILGLEFATVYLNEASQISYGARNMLLTRLAQKSDLRVREYIDANPPTTSHWLYGLFEEKIEPKSGEPLRDTGDYVTMQINPGSNRENLSEAYLSQLESLPEKERQRFLYGNYQTAIEGALWVLDHIKRAPMVADGNLDAVRDQMSRIVVAVDPSGCEGQEDYRSDEIGISVCGLDPDGVGHVLEDLSGRYGPSQWANVAISAYDRWRADVIVAERNFGGALVEANLRSVRDTVPVKVVTASRGKVARAQPVAGLYEQGRVVHHGRLPDLEEQLVQFSTAGYQGA…
2	1646211..1647386	PHAGE_Salmon_SEN34_NC_028699: putative portal protein; PP_01574; phage(gi966201420)	6e-100	VSRLYGGMSRLGVWQALADTIKWSRLYGGALAVMMIKGQDPSTPLRPATVRKGDFLGLYAIDRWIVTPDYADTIDDFGPALGQPKYYRVIPDADAFKGQVVHHSRVIRIDGVRLPMYQRQYENGWGMSIVERIMDVLMAFDSATLGAAQLVYKAHLRVMKVKGYKTVMGSLDERAKRGVMAQIDNIRAFQSNEGMSVIDSEDEFQALTYTFSGLNDVLMQFAQQIAGAIQIPMTRLLGQSPAGFSTGESDLRQYYDGVAQKQENLLRRGVHSLLEVMCYSELDEPPPKDFDFRFASLWGLSDKEKAEIMTARTTATVGAFDAGLVDRATALSELRSGSEIDGMWHSITEESIRSAESAPPDPGEVEGPPSPVVVPVGEENLQNEPPEASVR
3	1647680..1648150	phage putative head morphogenesis protein, SPP1 gp7 family [Frateuria aurantia DSM 6220]. gi|383316748|ref|YP_005377590.1|; PP_01575	1e-32	MLGRELRREIETAPTGATMQALQREQVDLITSLPREAAERIQKLTREGLISGSRSRSMVEEIMRSGEVAESRAICIARTETARASSVLTQARAQAAGCTHFRWRSHRDTRTRASHKAMNGAICEYANPPVVDGQPLMPGGIYNCRCYQVPILDGEM
4	complement(1648305..1648565)	hypothetical; PP_01576	0.0	VIEELRMVAHENADCGALEPALMVRESPEYAGAWLIVQWWRYLIEAAPRDTKAAAMLSLIKGKITEDDWPEGADDRRAPDLSIFGL
5	1648600..1650120	PHAGE_Salmon_SEN34_NC_028699: hypothetical protein; PP_01577; phage(gi966201422)	1e-46	VLKQISTCDFAPKRGADVYTVQRIGETRERLPDGSLLCRDVPIARLGQMTYDQSELPVDPAKDGTITVHRDAETLFHPDTITSFEGVPITLNHPPGVMLNPANYQSFSRGTLTHLRRGEGEKKDMLVGDAIIRDERAIEAIEKRGWREVSPGYDADYEPIEGAPGHYKQRNIIGNHLALVMRGRGGAQCAVGDQLSPLLEGRMAFKKKSWGHKLLTALSTNDADGVEEAIREGSQEEPEGGSTTTDRRTRDNGERIEPTIAKPATDADPLAEIKEQIAALAAKIEAMVKPATDAEPTEPTEQSAADRMAEKMRAEGMSEDKIRECLAVCGLTPSDIARADESAGARATADEESAAVSEIEDEAERLDDTNRAPTGDAAFTTVFRDAIATAEVLNPGQKT…
6	1650130..1650642	PHAGE_Salmon_SEN34_NC_028699: hypothetical protein; PP_01578; phage(gi966201423)	1e-13	MTAYKFRIDTGYAGTLSREPAPGDITPESLDPAANWSAYGFGLPVKYNGSGQITPLTGGETASQIAGLLVRSYPGRAVTNTGRTAYPQINGGAQDTARRGFMSVVLNGAGTPVKGSPVYVRVANPGTGEFIGGFEATVDATAGNQIELPNARFEGPAGSDGITEISFNLQ
7	1650682..1651743	PHAGE_Salmon_SEN34_NC_028699: hypothetical protein; PP_01579; phage(gi966201424)	1e-72	MEYPYMLTSSVKGGASTALSSPSIVRARTLDSAFTFDAATMDSVGNFFIGELERLDPTLHEPLAMVTWGRDIDLREDVSVSDDLSSFTRSSFGSVGGINPAGKNWIGAESTAIPAAQVDIDKIAQPLREWGSTLQYTYRELEKAMRLGRPIDAQKLAAINLKHQMDIDEMVYIGEPSFQGAYGMLNNPAAVSSQVADTGANGGTSFASKIDTPAQIQADVLALQSDVWATSGWKYVPSHILMPPAQFSLLNQTVSSAGTQSILEYLRVNNPYTQSTGERLSILPCKWCIGRGTGGADMMFAYTKDLNLIRYPLVPLQKTPITYQDMWLRTTYWSLLGQVEFVYAETTGSRYGI
8	1651973..1652419	hypothetical protein X636_20740 [Pandoraea sp. RB-44]. gi|564914709|ref|YP_008881675.1|; PP_01580	1e-21	MQTQPNLGLNSSQDVVAGVTNSGMTASDFLTLFPEFSDATRFPMPTVSLWLQMGRSFVDETRWGASTNLGIGLFVAHQLTVGAQTAAAVQGGATPGVGVISSKSVGPLSKSYDTSIGGYDDAGFWNTTSYGRQYWAFVSLFGAGGTQL
9	1652428..1652976	PHAGE_Salmon_SEN34_NC_028699: hypothetical protein; PP_01581; phage(gi966201427)	2e-33	VTIKANRLPEMRKAVTALTSKRVLVGIPEENAERNEGGDASNALIGYVLETGDPSRNLPARPFLVPGVAEVEQQSIDRLRKAGEAALRGDAAAVETALAAIGLSAEAAVKDKMDVGPFVPLSDATLQARIRAKKAGDAGAAQELQNRRAGMAPSTELAQPLIDTGDLQAHVTYVIRDIRTRR
10	1652976..1653350	PHAGE_Salmon_SEN34_NC_028699: hypothetical protein; PP_01582; phage(gi966201428)	7e-14	MPMLDVSDLLDDPDFCQTIVVTRMQDGTDGRGEATVEKTTFEFHGVVVPITSQELLRLPDAERLSGGISLYSRFNLLAGDGALSADEIIANNKTYTVVSVDDWGAFGAGFSVARCALLALQNED
11	1653354..1653932	PHAGE_Salmon_SEN34_NC_028699: hypothetical protein; PP_01583; phage(gi966201429)	2e-32	MTSATGAVLPSAAENIDQDAALDLLLGDFVAAITGLPRDYVRRRWQPRPPKQLPPDTDWCALGVVSQSHDVNAYQTINQDGSIDVGRHETFELLASFYGPNGAGFASRLRDGLTLGVNRGVLQANGMAMLDIGRIDRVPSLVNQQWLPRTDIRLRIRRHAVRTYPLQSVLSSEGTFQTETTTDTFNTENAAS
12	1653929..1655047	PHAGE_Salmon_SEN34_NC_028699: hypothetical protein; PP_01584; phage(gi966201430)	5e-92	MSAGLPVSDIVSVTVTLSPTAAGTRNFGALLVIGSSGVLGATENLRAYTSLAALAEDFGTTAPEYLAGDMFFSQSPQPSTLYVGEERQGEALTDTIARLASASGDWYGCVIALAAAPADSAVVSAAQMIEGLSPSRALFVTTQEAGAMDPTSTTDLAYLLKQANLSRTACQYSSSSPYAAASLFGRNATVDYAANNSVITLKFKSEPGVAAETLSQTQANALDAKNCNYFVNYQNGTAIIQQGVMSNGTFIDVRIGADAYQNSLQTAGFNRLYAATKIPQTDAGMTTLKADYDSVSQAYVANGFFAPGVWEGPPIGAINTGDTLTDGYYIYKPPIASQSAADRAARKAVTMQIACKLAGAVHSSNVLVNIVN
13	1655059..1655511	PHAGE_Salmon_SEN34_NC_028699: hypothetical protein; PP_01585; phage(gi966201431)	7e-32	MATGSTYSFLDVTASIVGVGLACSMGNEAGASEEGISIEMEGDKTNLTVGADGSYMHSLHAGNAGSVTVRLLKTSPYNAILMAAYNAQRITSAAWGKNVITINQNNSDDSIVCAGCAFTRQPNLDYAQDGGTVTWAFRSGKITGFLGTYS
14	1655511..1655927	PHAGE_Salmon_SEN34_NC_028699: hypothetical protein; PP_01586; phage(gi966201432)	7e-11	MADIEIGEKAFITGRLSARQQFHVARRLAPLFAAMVSNGGKSDLDGIAGGGDVDLSKVASSIANLSDADCDYVLDTCLSVVKYRDNGTVCNVALPSGQLRYDWIDMQMMLRLAGAVVQDNLAGFMPTAPSGSNDAAVA
15	1656121..1658319	PHAGE_Salmon_SEN34_NC_028699: tail tape measure protein; PP_01587; phage(gi966201433)	6e-70	MAEAGVMREFLVSLGWTVDQTGQKRFQNSLKGADQAATSLGDTLKILAEVLIDIHEQLTSASGAAHLYRDALSKVGTAVEQTSKKSSFLTKAGEAANQMMVIGQRIALSAGAAFLAESAAVFKTASAYSRLGYESQIAMSSVSGMQSFSYAVGQMGGSAEAARGSLQAMGNFLRSNPGGESFIARLGVQTRDTHGELRDTADVMQDLAKQFQAEPYYQAKAQAGVLGIDENTLQAMRRGLGQFGSEYRDIYRRAGVDQNQAARSSATFMQQLRSLGLVFQALRDKVAISLERGVGGDIVRFRKLMLENFDRITDIIVRATRFILALGDALAQLFGRGVGILSDLWDHFNNLDQSTRTWIVTIGALGAAWRLLNRGFLATPLGRLLAIGGAIIALYDDYK…
16	1658355..1659008	PHAGE_Salmon_SEN34_NC_028699: hypothetical protein; PP_01588; phage(gi966201434)	5e-24	LASLLFTGSRSITGAGDVNDEKGNPVSPITVIPDLAIRERHRDALGITAQPVQKGAAITDHAYKLPAELELEYGWSNSSIQALTSDFTDSTSITGLMDNFGEGYVRQVYQTLLQLQESRQLCTIVTGKRLYKNMLIAEVSTETTADTAYSMFVTCRCVEVFIVNTQTASVGALENQKNPADTASVQKGGTRALIPVANPPQSLLSVVFGGVSGLASR
Asaia prunellae JCM 25354
Genome; Raw sequence .3182743, GC%: 55.76%, length = 3182743 bps
Total : 2 prophage regions have been identified, of which 0 regions are intact, 2 regions are incomplete, 0 regions are questionable.
REGION	REGION_LENGTH	COMPLETENESS	SCORE	#CDS	REGION_POSITION	POSSIBLE PHAGE	GC_PERCENTAGE	DETAIL
1	13.6Kb	incomplete	30	21	256301-269916	PHAGE_Pseudo_vB_PaeM_MAG1_NC_031073, ......	55.19%	Detail
2	20.7Kb	incomplete	40	12	1602765-1623524	PHAGE_Edward_GF_2_NC_026611, ......	54.80%	Detail
Region 1, total : 21 CDS.
#	CDS_POSITION	BLAST_HIT	E-VALUE	SEQUENCE
1	256301..257230	PHAGE_Cronob_vB_CsaP_GAP52_NC_019402: scaffolding protein; PP_00307; phage(gi414087470)	2e-14	MAPEGAPEGAPEFDATEAFAARFTPSEASEGAAEDPHKKLPEPKAEEEATVSAEEAPAPEDDDPDVELPFGEESRTFKLKALRSIIEEHGQFSGRFEEAAKASEAATAQRARLEAAYSEMWRRAEERYAPYKDIDWLAISRDPSIDTETFRQIRADAEAAHADLAFLHSEVNGRLEETRKAAETAREEAAKACVEVLKDPVKGIKDFPAVYPKLIEFGRKSGVEGVENIVDPAVLRLLHKAYLYDTGSKTVDAQIQKVVNKPSRVIKPGSARASADTAEKAELNKAISNLRSHPSDVDAITAAFSAKFH
2	257240..258163	PHAGE_Pseudo_PhiCHU_NC_028933: major capsid protein; PP_00308; phage(gi971757328)	6e-35	LTTISSYDVVGTKEDVSDIISNIAPTSTPFQSMIGSDKCGQRLFDWQEDSLMNVGENAQTEGATAPDAQSKPTVMRENTTQIFTKTASVTGSMQKTQTYGRRDEMAYQLGLRSKELKRDREWAFIGTGQGKEAGAAGTARKMAGYQAMIDPSMIYTAGAGMNASETPAASPLTEQMVLTTQQACYDNGADPTTIIVRPSDAATIADFSASNRTVMVQNQDTTLNHNISIYKSPFGTLKVVMDRFVRGTNASGSKDTTADALLFDPAMWKLVTFRDWFTQDLAITGDTKNKQILGEFSLKHMNFKGSA
3	258301..258540	acriflavin resistance protein [Candidatus Puniceispirillum marinum IMCC1322]. gi|294083942|ref|YP_003550699.1|; PP_00309	1e-07	VILRKQELSDDFLAALRDERLASKNVREREYMKVASIPAAVFDLWCAQGYDPWNMEAREIVALLRRDNLEAFLATSKEI
4	258540..258815	hypothetical; PP_00310	0.0	MSYSPITIYKSTNLTLSSGSASAQPVSTASRAIRVVGTVDAWISLNGPAAVGQGLFLPTGHVEYLNAAPGTVLAAVPDNGAVGTINISEIG
5	259399..260019	PHAGE_Pseudo_tf_NC_017971: phage particle protein; PP_00311; phage(gi388604630)	2e-08	MSTLQDILSDFNGELNRDDCPQERAIAFVNRAVMRVQRTLRVPSMERSRLILAQGEMTYVTVPDDLLEMIDVFSSTTCQDRSRPLDRKAFRQIVELPKLGAPSAYARVGSTLHFRGAIPNGGSVLLHYYGSVDRLQDLSDTNAFSLSCPDLLTYGALKYAGLWCDHPSTQTWEDTFVGILGDVQGQTIAMENSGGPSAIQPLYPLD
6	260026..260313	hypothetical; PP_00312	0.0	MTTPSLKTPAKCCGSFFYDNTLSIAAALDIQNALQAALPLAQDANEAAQKALSDAQQALINANYFLTGDLRGLPTSDEGLPSGTLWNNGGTIAVV
7	260306..260866	PHAGE_Paenib_PG1_NC_021558: hypothetical protein; PP_00313; phage(gi514231206)	2e-06	LYRGLCGGTLLWLLASSSAYALPAPTFDKLTIKQGLTSGGLLQPPFVSILAKGAKCDGTTDDTVAINAVLSAYNNVAIPQGISKCLVSSPINITRNGTTLVGAGQTSVTFVSNSATAPVISVAAGLSNYTLSGFSVDRSVAPTSDTARGIDTSGGGGGFATCGTSMPPINGPDFIWAGWLMALHQT
8	260839..261660	parallel beta-helix repeat-containing protein [Methanobacterium paludis]. gi|333986509|ref|YP_004519116.1|; PP_00314	4e-06	MAYGVASNLTAQNNYGDGFYLSNNATYTTAQWNLTNTISQTNDGYGYSVVSNTKNPMILLPWWDTQAFANGLGGARFVGTPEGYISNINIEGGIFSTDGNNELFFNTYSGHITVSGGTFIEAAGTAATGRSFRLPKSNIGRGIYVTGNVADIQIGDVIVFDNSQEGYVGSAFRTQIVGAEFLQNGANGAAGTCSINLINTNQASTALITGTRSGALNSNLSTTAGICAVNGAGVTITGNDLAYNSQVGVYFSGDKTGAHVEAMPVISRSAVAR
9	261899..262153	hypothetical protein AZC_3577 [Azorhizobium caulinodans ORS 571]. gi|158425201|ref|YP_001526493.1|; PP_00315	6e-05	MLSPEERTDIPNTLLLLVGRIEGKLDMLLTRDKEQDRKLKDLEERISTIENDRAKVLGIWAAVSLGIGGVGWIGETLFNHFWTK
10	262153..262329	hypothetical; PP_00316	0.0	MKITKLEGAAIAGGIATVAAAAESAITSGSSDAIRAVILAAVTAIIKIIAAFKTPKAT
11	262329..262781	PHAGE_Acinet_AP22_NC_017984: putative endolysin/autolysin; PP_00317; phage(gi388570824)	1e-24	MGFPEEAVALVASFEGFRSRPYRDQGGVWTIGYGSTYLLNGKPVTAATPTMSEPMAAALLRNVLVSFWDTIERLVKVPLTDRQGAAVLSLVYNIGESAFSRSTLLKRLNAGDFKGAANEFPKWNLIKGEVSRGLSLRRAKNVICSCPQVK
12	complement(262835..262990)	PHAGE_Entero_K30_NC_015719: hypothetical protein; PP_00318; phage(gi338826833)	3e-09	VSETVTITVERHSELLDAERELDALHAGGVDNWEWYSESLREAGFYDEDDE
13	complement(262987..263178)	PHAGE_Caulob_Cr30_NC_025422: hypothetical protein; PP_00319; phage(gi725949290)	5e-17	MDWSNCLASLKRHLASWEMGTDNDAETGRMHMAHVMWNAMALVTYALRGIGTDDRPQIRAHTV
14	complement(263481..263735)	hypothetical; PP_00320	0.0	VAFDDGAYDDGRLTDFEFLHPAVNTEALKADLMAAVEAGEGASVWDTLGSHAKPAFAKELLEKHFNLVRVPASAAKWVEKESAA
15	complement(263862..264464)	PHAGE_Prochl_P_SSP7_NC_006882: T7-like exonuclease; PP_00322; phage(gi61806419)	1e-38	VLFTGPHNFRKKILPTYKGNRKGGKPLAYWATVRAVKERFKCDEVDGLEADDLMGILATSEGHEDSIVVTLDKDLRTVPGRHFNPVKDAKPCIITPSQANLKWFTQTLTGDTTDNYAGCPGIGPKRAEAILKGWDGRSLTAGWKMVVEAYKSKKLTEADALVQARVAKILTRDDYDKESKEVILWGLKGPQRLKLEDVMK
16	264525..264638	hypothetical; PP_00321	0.0	LGFFFVCVYGRLNGAEVESLLNRCCGSEGAYIAVNQS
17	complement(264635..265120)	hypothetical protein [Rhodopseudomonas palustris DX-1]. gi|316934303|ref|YP_004109285.1|; PP_00323	1e-07	LRDLCWGFHVKDLDIFVDAADGPLEERLPDLQKIFGACAFCSLDYIPSSAPEVGASAVFPDCAFGPLPINVIEIQRPHGVNDFETFVRRRMDFAACQISYDDNLVRMTDQGFADLRDKVMRLVRKETPEGVERSLRRAERFQQRMPGIRFELGMEAPSPSA
18	complement(265218..265391)	hypothetical; PP_00324	0.0	VVVGEEDVWEIPKSRISSSNLCLKSDGPRPPTQWNGYMIKISDILCPPTFTELSNNP
19	complement(265654..267534)	PHAGE_Delfti_IME_DE1_NC_028702: DNA polymerase; PP_00325; phage(gi966201633)	9e-72	MSVSEEVLIWDCEADGLLDTASKLHSLQIGTVTGTDSTVYCDAMPGYPSIAKGLKRLSEAPKLIGHNVLKYDFPLIEKLYPGTLRLEQMVDTLVMARLFSPEERAHSLDEWGQRLGVLKGTFKGPWDTCTPAMLEYAAQDVIVTRALYNHVKEVEEWGCLDTELKFAWIMFLQEQNGFTLDIKAAQELEAELRGELADLLTEAQSAFPPRWVPNGKNAQAALFVPKSDNKRHGYTAGCPMTKVILQDFNPGSRKQVGERLMQLGWKPKAYGNDGNPTIDDEILSRLPFPQAKKLVRYFAVSKQLGQLSDGKYGWLQVVGSDGRIHGRVNSVGCAPGRCSHSAPNMAQVSKKDLRMRSVWIARKGWKLIGCDGASIQARALAHYLAHYDGGLAINREING…
20	268371..268493	hypothetical; PP_00326	0.0	VVVVYAQPQTSEVSLTANGTAVVLVLELLVIIGDGQAVAP
21	complement(268525..269916)	PHAGE_Delfti_IME_DE1_NC_028702: primase/helicase protein; PP_00327; phage(gi966201631)	1e-86	MGYKVGKDKHGNVVQIADYRGADGHLVGQKLRGKDKAFSAIGMKNAPLFAQHVWPNKGKRVVVTEGEIDALSVAQITGLSWPVVSLPNGAQSAAKALSAQIEWLEGYEEVVLMFDMDEPGRKAAAECAQLFTPGRCKIAELPRKDANEMLMANEAKALTTAIYNARTYRPDGIVTLADVRDKILAPIEVGIPYLFPGVTAATYGRGRGQLIGIGAGSGVGKTDLVTQMVETDITQLGLKVGILFLEQPVEQTGKRLAGKFAGKRFHIPDGSWTQEELEAALGTVAQEDRLYLYDSFGGATWSVIRGHIKYMVQHLGCDCIYLDNLTALTAHMDDERQELDAMLEEMATMAKTLDFVFHFISHLATPKDGPPHEEGGRVKGQHFKGSRTIMFWAHMLWGL…
Region 2, total : 12 CDS.
#	CDS_POSITION	BLAST_HIT	E-VALUE	SEQUENCE
1	1602765..1602776	attL TCAGCGTCATAT	0.0	TCAGCGTCATAT
2	complement(1617674..1618225)	PHAGE_Aeromo_vB_AsaM_56_NC_019527: putative tail-fiber/lysozyme protein; PP_01880; phage(gi422937553)	3e-12	MSVIDRFVVELALDPKKFSGPAKKAVEDLRTFEKQAGNTGNSIEGVGRKGADAFAGVRREALAMFAVFTAGRSLKAFVSDTTKANMQLDYMSQRLNMDPGGLTRLETAAKAAGGTLGEVTQSFAALQQRLTDPQQWAQVTRAFTQLGVSDFTDEHGRLRADIVLRLNQAFMPIMSIMLSRLDT
3	1618301..1618414	hypothetical; PP_01881	0.0	MLYRAIQKQGLRKGRALSDADLLQTQVCYIDGKMTDA
4	complement(1618524..1618655)	hypothetical; PP_01882	0.0	MVVCGIGAVSDHLSLQKPEQRAFLIFRKGYEHRHMRMAKKFGV
5	1619267..1619740	hypothetical; PP_01883	0.0	MEAEEIFREAVAVHGGANAEQVYGEYLAQDKKRKDEAQTLDSIGRYGADLVSKCGGNPVAMAPLMAFDDPYALKGKCYTALISDQWGGKQWIDENTILLMTVIPGTTQSYSTVFMDPRSHLRFGHRALVIGASPTSYTAISGAQTVAPTFIVLKYLD
6	1620114..1620326	hypothetical; PP_01884	0.0	LNDTAENAYDILYQKTTEKLLALGLCNACASGVAEEYLKKPNGACGIMAARALHGDTSAVDFLNDGSVCR
7	1620551..1620883	PHAGE_Pseudo_YMC11/07/P54_PAE_BP_NC_030909: tail tape measure protein; PP_01885; phage(gi100049)	2e-10	MRRCEDAKKTGTVDGVAFKITPKGLDFLQDDGGLSAILNVVTVRLEAETLRELVTARIDASSEPAAKKAEAKSLLRGLSEEALKAVVAKLVEMGIGTLHDPAQHLLSLIK
8	1621064..1621318	PHAGE_Burkho_ST79_NC_021343: HicA protein; PP_01886; phage(gi509141624)	2e-13	MKAKHRRTLELIFKRPVSGNVAWSEIEALFVVLGAEISERKGSRVGVFLFGEVRVFHRPHPKPDTDKGAVAAVRKWLEANGVTP
9	1621327..1621647	PHAGE_Burkho_ST79_NC_021343: HicB protein; PP_01887; phage(gi509141623)	1e-09	MTIGGHQAVIQFDPEIGMFRGEFLGLNGGADFYADSVAGLVAEGETSLRVFLEMCAEKGIEPVRRYSGKFQVRVPEGVHAQAVTAAAARGVSLNQFVQDAIEQAAR
10	complement(1621654..1621785)	hypothetical; PP_01888	0.0	VSRPIAYVVGSGLATLHELETIYDTEDLLDLMEIGQVRDFNGG
11	complement(1621788..1622249)	PHAGE_Acinet_phiAC_1_NC_028995: hypothetical protein; PP_01889; phage(gi971763825)	4e-06	MALKQTELTLTDGGVDKRFIITRMTAMQADRWARHLVTALTRAGVQLPSEAMEMGMAGLGGIAQALYGQLDDEAADVAIAELRKTVKIARDPSNPAATSGLTEFDIVDAEALGKLDQEAFRLHVDFIRAAARFISPLVGMLVPVASPDPSPAA
12	complement(1622249..1622740)	PHAGE_Aeromo_vB_AsaM_56_NC_019527: hypothetical protein; PP_01890; phage(gi422937550)	2e-23	LIADILPRLLSTYRDKHSVMAAFITSADAIFVLTIDTLFNAPITLENWSADRAWEAAAIEQVQTRMSIDGKLNAGWVPNPVDMTLNIQPNSLSIPVFEALQTAQATARTPYQLGAEITLPGLKRKYTLTTGYLVTGSVMPAAGRLLEERSFTLRWERVIGLGI
13	1622485..1622496	attR TCAGCGTCATAT	0.0	TCAGCGTCATAT
14	1622757..1623524	PHAGE_Mycoba_Bobi_NC_022055: integrase; PP_01891; phage(gi530545402)	2e-13	VVPLADAFGHLRIDQIDQKRWDTYASGRVKKNGGENVPVSAGTLRREFNVLRAALRRAWKDGFLVRPPEIEPPRDSAPRDRFLTKEEARRLIEAAKTPHVRLFMALAIYTGARKGSILALTWDRVHWTTNMIDFQEPGRALTRKRRATVPMTRALRDEMESAYQERNGDYVVNWHGKPIPSGLRWSFSKACERAGLTWKPTPHHLKHSLASWFAMDGVPIDQTSDWLATDPQTLRRVYRKFDPSYLKNIAEGFKL
Links to the Asaia PHAST information:
Asaia astilbis JCM 15831
http://phast.wishartlab.com/cgi-bin/Results.cgi?num=1534179759&multi=1
Asaia prunellae JCM 25354
http://phast.wishartlab.com/cgi-bin/Results.cgi?num=1534179822&multi=1
Asaia platycodi JCM 25414
http://phast.wishartlab.com/cgi-bin/Results.cgi?num=1534179827&multi=1
Asaia platycodi SF2.1
http://phast.wishartlab.com/cgi-bin/Results.cgi?num=1534179848&multi=1
Asaia bogorensis NBRC 16594
http://phast.wishartlab.com/cgi-bin/Results.cgi?num=1534179864&multi=1
Asaia bogorensis W12
http://phast.wishartlab.com/cgi-bin/Results.cgi?num=1534259351&multi=1
